# Supplementary material
Source: publisher figshare collection journal article supplement (https://gsajournals.figshare.com/ndownloader/files/14690753)
Supplement: Supplementary file 1 [file 14690753]

	Goss1_W0B14.htseq	Goss2_W0B14.htseq	Goss3_W0B14.htseq	Goss4_W8B14.htseq	Goss5_W8B14.htseq	Goss6_W8B14.htseq	Goss7_W15B14.htseq	Goss8_W15B14.htseq	Goss9_W15B14.htseq	Goss10_CMN0B14.htseq	Goss11_CMN0B14.htseq	Goss12_CMN0B14.htseq	Goss13_CMN8B14.htseq	Goss14_CMN8B14.htseq	Goss15_CMN8B14.htseq	Goss16_CMN15B14.htseq	Goss17_CMN15B14.htseq	Goss18_CMN15B14.htseq	Goss19_W0N551.htseq	Goss20_W0N551.htseq	Goss21_W0N551.htseq	Goss22_W8N551.htseq	Goss23_W8N551.htseq	Goss24_W8N551.htseq	Goss25_W15N551.htseq	Goss26_W15N551.htseq	Goss27_W15N551.htseq	Goss28_CMN0N551.htseq	Goss29_CMN0N551.htseq	Goss30_CMN0N551.htseq	Goss31_CMN8N551.htseq	Goss32_CMN8N551.htseq	Goss33_CMN8N551.htseq	Goss34_CMN15N551.htseq	Goss35_CMN15N551.htseq	Goss36_CMN15N551.htseq
gene:Zm00001d000001	11	8	19	6	19	19	15	18	11	13	10	13	18	26	28	21	19	23	41	44	42	49	34	35	17	5	30	35	28	28	38	39	51	22	16	10
gene:Zm00001d000002	5	5	11	8	12	12	6	7	7	11	11	15	14	24	25	8	13	13	30	31	39	7	8	5	1	0	3	20	6	4	20	18	22	24	22	23
gene:Zm00001d000003	1	0	0	0	0	0	1	0	0	0	0	0	0	0	0	0	0	0	1	0	0	0	0	0	0	0	0	0	0	0	0	0	0	0	0	0
gene:Zm00001d000004	106	110	123	90	209	184	81	106	80	150	139	155	178	206	164	138	139	120	137	153	163	229	195	275	177	51	241	192	212	219	233	235	253	179	173	147
gene:Zm00001d000005	13	24	39	12	26	34	6	11	3	24	22	23	26	35	32	11	9	14	10	17	11	23	26	21	14	4	13	10	20	18	22	14	14	6	10	17
gene:Zm00001d000006	0	0	0	0	6	5	1	0	1	1	1	3	0	0	1	10	8	13	0	0	1	3	3	1	0	0	1	1	1	0	1	2	2	0	3	2
gene:Zm00001d000008	0	0	0	8	17	10	2	1	2	3	0	0	0	4	3	6	13	13	0	0	0	3	3	3	1	1	2	0	0	0	4	0	2	2	0	3
gene:Zm00001d000009	0	0	0	1	0	0	0	0	0	0	0	1	0	1	0	0	0	0	0	0	0	0	0	0	0	0	0	0	0	0	0	0	0	0	0	0
gene:Zm00001d000011	149	146	151	82	241	173	205	306	171	147	157	171	172	212	177	246	256	242	53	44	58	77	49	57	109	32	144	47	50	41	61	55	59	67	66	120
gene:Zm00001d000012	2	7	5	1	1	2	2	0	5	17	7	8	0	2	2	7	9	12	7	6	2	5	3	1	2	0	3	13	5	4	5	11	3	4	8	2
gene:Zm00001d000013	0	0	0	0	0	0	0	0	0	0	0	0	0	0	1	0	0	0	0	0	1	0	0	0	0	0	0	1	1	0	1	0	2	0	0	0
gene:Zm00001d000016	0	0	0	0	0	0	0	0	0	0	0	0	0	0	0	0	0	0	1	0	0	0	0	0	1	0	1	1	0	0	0	0	1	1	1	0
gene:Zm00001d000017	0	0	1	0	2	1	1	2	1	0	1	2	1	1	2	2	4	7	3	0	1	1	0	1	0	0	0	0	0	2	0	3	0	0	0	1
gene:Zm00001d000018	20	17	20	3	6	3	7	18	5	29	34	17	1	2	3	14	18	13	11	7	10	6	7	3	5	1	2	11	11	12	12	15	8	5	12	9
gene:Zm00001d000019	152	125	148	186	501	438	147	220	116	265	265	261	449	509	449	222	209	206	127	115	133	345	361	339	80	14	78	174	275	286	356	368	439	210	154	193
gene:Zm00001d000020	297	236	263	1	1	4	504	607	456	28	29	23	3	3	2	738	622	576	521	522	602	18	4	21	473	158	513	332	94	91	6	18	12	764	654	626
gene:Zm00001d000021	1481	1509	1622	320	752	698	460	643	390	928	924	910	573	598	607	626	613	573	1203	1201	1288	866	816	866	881	246	1074	1061	934	886	847	792	836	915	757	725
gene:Zm00001d000023	234	197	190	143	383	305	222	410	263	288	259	310	305	361	368	348	364	319	235	243	263	327	333	319	403	106	494	295	282	307	363	325	372	386	379	355
gene:Zm00001d000025	0	0	0	0	0	0	0	0	0	0	0	0	0	0	0	0	0	0	0	0	0	0	0	0	0	0	0	0	0	0	0	0	0	0	0	0
gene:Zm00001d000026	0	0	0	0	0	0	0	0	0	0	0	0	1	0	0	0	0	0	0	0	0	0	0	0	0	0	0	0	0	0	0	0	0	0	0	0
gene:Zm00001d000027	0	0	0	0	0	1	0	0	0	0	2	0	0	0	0	0	1	0	7	9	6	14	11	11	9	2	22	11	9	8	20	11	8	13	11	11
gene:Zm00001d000028	40	43	47	55	118	86	81	94	57	22	39	31	72	90	93	81	82	81	63	52	49	95	122	108	162	55	184	37	32	32	100	98	140	125	109	128
gene:Zm00001d000029	848	882	896	360	955	867	592	914	539	1018	972	979	833	968	913	873	860	815	1035	932	997	1286	1204	1346	1505	366	1853	1224	1407	1379	1310	1312	1500	1325	1252	1237
gene:Zm00001d000030	532	502	541	262	626	567	289	432	256	654	546	605	507	653	633	410	438	415	746	683	807	731	738	798	602	150	750	762	893	893	805	807	887	600	542	552
gene:Zm00001d000032	0	0	0	0	0	0	0	0	0	0	0	0	0	0	0	0	0	0	0	0	0	0	0	0	0	0	0	0	0	0	0	0	0	0	0	0
gene:Zm00001d000034	9	4	7	5	4	7	3	7	1	5	3	4	4	10	3	3	8	7	12	6	12	6	5	6	5	1	8	6	6	7	4	5	7	7	8	7
gene:Zm00001d000035	15	25	11	30	75	81	17	31	16	35	22	26	63	74	67	31	35	28	42	43	52	129	114	152	86	15	137	52	56	55	114	148	172	88	74	73
gene:Zm00001d000036	91	79	93	12	17	22	0	0	1	205	245	202	22	34	27	1	1	0	0	0	0	0	0	0	0	0	0	0	0	0	0	0	0	0	0	0
gene:Zm00001d000037	42	42	44	81	198	190	50	62	38	23	23	26	146	190	172	51	47	51	8	4	10	35	31	42	12	2	9	7	6	6	48	38	45	11	12	11
gene:Zm00001d000038	4	3	2	5	2	3	1	0	1	1	0	1	2	2	1	1	3	2	3	2	0	0	3	2	2	1	1	2	3	3	2	1	1	2	0	1
gene:Zm00001d000039	17	16	21	4	14	8	3	1	3	16	13	17	14	16	18	2	5	3	7	6	6	10	13	10	3	0	7	6	14	11	16	8	13	7	6	6
gene:Zm00001d000040	27	31	27	20	42	34	23	21	13	69	70	72	38	28	35	29	51	39	139	124	127	203	225	214	277	86	427	149	152	159	181	130	176	274	264	399
gene:Zm00001d000041	72	84	89	51	114	113	53	105	35	131	122	128	83	114	98	121	128	113	97	100	107	143	138	147	337	81	474	114	107	129	101	113	125	203	182	244
gene:Zm00001d000042	50	47	40	54	156	163	39	89	53	55	57	52	117	167	98	63	80	73	21	25	24	58	56	49	48	12	68	18	24	12	67	59	62	75	57	80
gene:Zm00001d000044	0	0	0	0	0	1	0	0	0	0	0	0	0	0	0	0	0	0	5	2	3	1	1	1	0	0	1	1	3	0	1	1	0	0	1	0
gene:Zm00001d000045	99	62	82	38	78	71	52	92	54	76	69	79	89	105	80	68	84	79	82	78	99	101	65	93	80	36	90	90	95	86	86	88	85	91	56	78
gene:Zm00001d000046	183	183	176	166	471	408	391	593	386	204	195	220	402	465	469	631	621	668	140	132	133	406	388	460	592	127	921	156	142	161	398	408	506	446	425	554
gene:Zm00001d000051	0	0	0	0	0	0	0	0	0	0	0	0	0	0	0	0	0	0	0	0	0	0	0	0	0	0	0	0	0	0	0	0	0	0	0	0
gene:Zm00001d000052	87	82	85	116	270	214	91	134	64	158	135	130	212	284	251	164	200	137	103	94	107	231	217	231	165	46	242	117	176	169	244	212	273	188	146	207
gene:Zm00001d000053	101	114	116	156	340	313	232	345	210	145	154	155	255	335	314	302	297	298	135	110	132	312	261	304	411	128	547	119	167	141	273	290	307	286	280	321
gene:Zm00001d000055	1	0	1	0	0	1	4	0	3	0	0	0	2	4	0	1	5	0	0	4	0	6	1	1	4	1	3	3	2	0	5	4	3	3	1	2
gene:Zm00001d000058	0	0	0	0	0	0	0	0	0	0	0	0	0	0	0	0	0	0	0	0	0	0	0	0	0	0	0	0	0	0	0	0	0	0	0	0
gene:Zm00001d000060	2715	2557	2896	490	1130	1137	840	1161	738	1465	1434	1482	632	734	719	566	615	569	1537	1579	1727	935	796	951	1152	307	1391	1464	1123	1107	686	644	733	725	702	748
gene:Zm00001d000061	0	0	1	0	0	1	0	0	0	0	1	0	0	1	0	0	0	0	0	0	0	3	0	1	0	0	1	0	1	0	0	1	2	0	0	1
gene:Zm00001d000062	2	0	1	0	1	1	2	0	0	0	0	0	0	0	0	0	0	0	0	0	0	0	0	0	0	0	0	0	0	0	0	0	0	0	0	0
gene:Zm00001d000064	1	0	0	0	0	0	0	1	0	1	0	0	0	0	0	1	0	0	0	0	0	0	0	0	1	0	0	0	0	0	0	0	0	0	0	0
gene:Zm00001d000065	2	4	6	1	1	0	0	1	0	9	12	3	1	2	0	0	1	1	2	5	1	3	3	3	0	1	2	5	1	11	0	0	0	0	0	0
gene:Zm00001d000066	0	0	0	0	0	0	0	0	0	0	0	0	0	0	0	0	0	0	0	0	0	0	1	0	0	0	0	0	0	0	0	0	0	0	0	0
gene:Zm00001d000067	0	0	0	0	0	0	0	0	0	0	0	0	0	0	0	0	0	0	0	0	0	0	0	0	1	0	0	0	0	0	0	0	0	0	0	0
gene:Zm00001d000070	58	33	34	10	25	25	8	6	7	47	47	45	19	24	20	9	10	7	42	56	36	18	26	27	27	9	52	43	39	29	17	25	24	21	16	11
gene:Zm00001d000071	277	290	359	464	1248	1124	684	1033	564	1082	1034	1108	1020	1163	1021	853	1057	904	378	340	371	844	747	831	646	185	720	646	985	858	887	790	940	750	671	700
gene:Zm00001d000072	110	115	109	229	576	559	163	254	151	304	305	313	495	515	523	173	200	216	56	46	62	260	230	252	121	37	127	82	120	129	228	213	254	158	152	148
gene:Zm00001d000074	2	3	3	3	13	6	2	4	1	6	8	6	5	6	6	3	3	7	0	1	0	5	4	8	8	2	5	4	4	4	6	5	3	5	4	1
gene:Zm00001d000076	8	3	6	6	10	7	8	11	1	8	5	6	11	11	8	6	7	8	6	6	7	11	2	3	2	0	6	3	3	6	5	6	9	9	5	9
gene:Zm00001d000077	18	25	22	23	41	41	18	35	25	43	38	30	26	64	42	21	28	44	26	34	22	41	41	44	34	6	50	28	49	31	28	38	43	32	23	29
gene:Zm00001d000079	0	0	0	0	0	0	0	0	0	0	0	0	0	0	0	0	0	0	0	0	0	0	0	0	0	0	0	0	0	0	0	0	0	0	0	0
gene:Zm00001d000080	308	282	319	170	417	398	373	537	329	177	164	173	331	401	348	576	558	541	314	325	349	343	322	424	610	156	962	265	198	160	323	339	340	519	481	618
gene:Zm00001d000081	0	0	0	0	0	0	0	0	1	0	0	0	0	0	0	0	0	0	0	0	0	0	0	1	0	0	0	0	0	0	0	0	1	0	0	0
gene:Zm00001d000082	0	0	0	0	0	0	0	0	0	0	0	0	0	0	0	0	0	0	0	0	0	0	0	1	0	0	0	0	0	0	0	0	0	0	0	0
gene:Zm00001d000083	0	0	0	0	0	0	0	0	0	0	0	0	0	0	0	0	0	0	0	0	0	0	0	0	0	0	0	0	0	0	0	0	0	0	0	0
gene:Zm00001d000085	45	46	60	22	34	37	21	32	15	48	47	60	37	53	43	36	27	39	15	24	26	17	20	26	14	8	27	25	26	35	21	12	31	22	11	19
gene:Zm00001d000086	80	66	71	25	80	61	40	68	36	66	73	75	57	56	86	67	56	61	0	0	0	0	1	0	0	0	0	0	0	0	0	0	0	0	0	0
gene:Zm00001d000087	8	4	7	8	18	17	13	12	14	7	7	6	16	21	8	9	8	7	0	2	0	3	0	3	6	0	0	0	0	0	2	0	0	0	0	1
gene:Zm00001d000089	0	0	0	0	0	0	0	0	0	0	0	4	0	0	1	0	0	0	0	0	0	0	0	0	0	0	0	0	0	0	0	2	0	0	0	0
gene:Zm00001d000092	0	0	1	0	0	0	0	1	0	0	2	0	0	0	0	1	0	0	0	0	1	1	0	0	1	0	0	0	0	1	0	0	0	0	0	0
gene:Zm00001d000093	3	5	3	11	20	22	1	3	4	16	10	6	13	15	11	7	7	5	9	2	3	6	3	5	5	0	0	2	5	4	5	3	6	2	1	3
gene:Zm00001d000094	11	15	21	6	23	22	31	7	4	13	17	13	7	14	16	15	7	7	11	18	8	13	18	14	7	1	11	12	16	12	19	15	17	21	14	9
gene:Zm00001d000095	0	0	0	0	0	0	2	1	0	0	0	0	0	0	0	1	0	1	0	0	0	0	0	0	0	0	0	0	0	0	0	0	0	0	0	0
gene:Zm00001d000096	0	0	0	0	0	0	0	0	0	0	0	0	0	0	0	1	0	0	0	0	0	0	0	0	0	0	0	0	0	0	0	0	0	0	0	0
gene:Zm00001d000097	0	0	0	0	0	0	0	0	0	0	0	0	0	0	0	0	0	0	0	0	0	0	0	0	0	0	0	0	0	0	0	0	0	0	0	0
gene:Zm00001d000098	62	72	79	32	101	97	51	68	36	29	39	25	82	112	81	94	112	101	70	57	49	80	86	92	127	19	139	48	38	42	86	84	124	149	138	118
gene:Zm00001d000099	46	55	61	25	62	57	23	29	27	44	37	43	50	43	40	76	75	80	71	67	66	143	107	147	119	26	141	56	57	72	136	139	149	106	109	106
gene:Zm00001d000101	0	0	0	0	0	0	0	0	0	0	0	0	0	0	0	0	0	0	0	0	0	0	0	0	0	0	0	0	0	0	0	0	0	0	0	0
gene:Zm00001d000102	170	146	169	63	211	170	112	162	71	160	156	168	203	239	196	183	166	133	163	177	149	195	162	213	142	33	151	170	249	224	214	252	255	143	160	121
gene:Zm00001d000104	1	1	0	0	0	0	0	0	0	0	0	0	0	0	0	0	0	0	0	0	0	0	0	0	0	0	0	0	0	0	0	0	0	0	0	0
gene:Zm00001d000105	0	0	0	0	0	0	0	0	0	0	0	0	0	1	0	0	1	0	0	0	0	0	0	0	0	0	0	0	0	0	0	0	0	0	1	0
gene:Zm00001d000106	0	0	0	0	0	0	0	0	0	0	0	0	0	0	0	0	0	0	0	0	0	0	0	0	0	0	0	0	0	0	0	0	0	0	0	0
gene:Zm00001d000107	0	1	0	0	0	0	0	0	0	0	0	0	1	0	0	0	0	0	0	0	0	0	0	0	0	0	0	0	0	0	0	0	0	0	1	0
gene:Zm00001d000109	17	10	10	13	40	33	18	39	22	18	24	20	27	30	20	28	30	36	13	11	10	27	20	25	20	6	40	6	13	11	18	19	17	8	9	20
gene:Zm00001d000110	741	750	784	320	808	836	395	616	385	708	642	736	714	883	731	674	725	668	814	784	845	698	692	699	688	172	955	764	841	788	800	729	878	665	566	765
gene:Zm00001d000111	0	0	0	0	0	0	0	0	0	0	0	0	1	0	0	1	0	0	0	0	0	0	0	0	0	0	0	0	0	0	0	0	0	0	0	0
gene:Zm00001d000112	381	296	358	64	179	154	87	141	77	133	143	136	234	310	235	178	180	175	498	488	480	290	276	288	258	58	286	400	290	306	349	312	396	248	190	228
gene:Zm00001d000113	21	6	15	3	13	7	1	7	4	9	9	11	17	15	7	6	14	5	189	178	190	156	140	166	116	28	183	165	118	142	176	183	175	92	79	110
gene:Zm00001d000115	0	0	0	0	0	0	0	0	0	0	0	0	0	0	0	0	0	0	0	0	0	0	0	0	0	0	0	0	0	0	0	0	0	0	0	0
gene:Zm00001d000116	1720	1567	1622	806	1840	1785	246	301	177	2977	2840	3086	1512	1647	1673	424	435	390	2002	1974	2124	2377	2257	2456	629	156	792	2982	3889	3839	2945	2812	3075	906	804	886
gene:Zm00001d000117	12	10	10	4	8	6	19	30	14	10	14	18	1	4	8	30	44	50	12	13	14	6	1	7	30	10	41	15	24	22	5	16	10	30	24	22
gene:Zm00001d000118	0	1	0	0	0	0	1	0	1	0	1	0	0	2	0	0	0	0	1	2	0	3	2	1	0	0	0	3	3	2	4	1	3	2	3	1
gene:Zm00001d000120	288	311	317	122	343	275	159	237	119	274	240	249	270	337	291	262	225	248	250	213	248	272	241	274	215	59	303	249	227	230	273	300	296	202	205	202
gene:Zm00001d000121	0	0	0	0	0	1	0	0	1	0	0	0	2	1	1	1	1	1	0	0	0	0	0	1	0	0	0	0	0	0	1	0	0	1	1	0
gene:Zm00001d000122	69	70	58	21	37	40	40	47	26	45	69	59	46	46	48	41	35	32	59	55	72	33	23	31	43	15	60	62	44	45	34	18	27	46	53	40
gene:Zm00001d000123	5343	5387	5765	451	1146	1011	1438	2069	1187	3952	4041	4008	1222	1478	1347	2190	2087	2034	5829	5441	6044	931	893	982	2358	538	2943	5450	4942	5237	1241	1179	1271	2434	2260	2433
gene:Zm00001d000124	1210	1202	1244	291	802	714	828	1212	713	818	803	813	764	876	794	1577	1456	1402	1354	1348	1419	977	845	972	1492	322	2409	1189	946	992	1079	988	1210	1597	1475	1549
gene:Zm00001d000126	42	44	36	15	33	30	121	152	118	15	15	15	24	34	42	234	254	200	42	47	61	39	30	35	124	41	189	40	6	4	33	38	41	172	128	143
gene:Zm00001d000128	5	1	2	1	1	1	2	0	2	2	1	1	0	1	0	2	1	4	4	3	2	0	3	1	1	2	3	3	1	2	2	1	3	5	2	0
gene:Zm00001d000133	4883	4843	4961	1001	2251	2066	2784	4367	2622	3641	3527	3552	1777	1915	1956	5215	5228	4737	5039	4736	4900	1626	1562	1587	3074	739	4053	4480	4259	4003	2187	2065	2261	4908	4662	5684
gene:Zm00001d000134	0	0	0	0	0	0	0	0	0	0	0	0	0	0	0	0	0	0	0	0	0	0	0	0	0	0	0	0	0	0	0	0	0	0	0	0
gene:Zm00001d000135	99	58	100	67	139	136	51	86	44	93	125	96	104	111	109	106	89	107	109	111	115	203	161	230	83	16	91	109	132	115	187	197	209	129	111	147
gene:Zm00001d000137	73	79	61	46	136	106	27	50	42	108	104	114	95	116	107	55	48	41	100	106	108	126	127	123	82	20	110	93	129	112	118	126	143	69	62	77
gene:Zm00001d000139	0	0	0	0	0	0	0	0	1	0	1	0	0	0	0	0	0	0	0	1	0	0	0	0	0	0	0	0	0	0	0	0	0	0	0	0
gene:Zm00001d000140	0	0	0	0	0	0	0	0	0	0	0	0	0	0	0	0	0	0	0	0	0	0	0	0	0	0	0	0	0	0	0	0	0	0	0	0
gene:Zm00001d000141	0	0	0	0	2	0	0	0	0	0	0	0	0	0	1	0	0	0	0	1	0	1	0	0	0	0	0	1	1	0	0	0	0	0	0	0
gene:Zm00001d000142	0	0	1	0	0	0	0	0	0	0	0	0	0	1	0	0	0	0	0	0	0	0	0	0	0	0	0	0	0	1	0	0	0	0	0	0
gene:Zm00001d000143	63	79	64	23	52	46	16	18	11	46	32	20	39	30	33	28	13	14	86	88	98	45	46	43	30	5	41	79	52	65	60	55	48	26	19	23
gene:Zm00001d000145	0	0	0	0	0	0	0	0	0	0	0	0	0	0	0	0	0	0	0	0	0	0	0	0	0	0	0	0	0	0	0	0	0	0	0	0
gene:Zm00001d000147	0	0	2	0	1	2	1	1	2	0	0	0	2	3	4	1	2	1	0	2	0	5	5	2	12	3	9	0	0	0	3	7	1	8	6	2
gene:Zm00001d000150	3	0	3	1	4	5	0	1	2	4	2	4	3	5	2	2	2	3	2	3	4	0	5	6	3	0	7	6	6	0	5	4	4	0	2	0
gene:Zm00001d000152	25	38	37	25	65	48	27	43	21	47	29	44	67	65	64	37	33	37	41	35	41	68	55	68	53	7	66	43	49	57	70	49	77	42	46	38
gene:Zm00001d000153	214	223	252	205	517	426	131	216	148	241	200	238	341	416	399	244	237	224	179	202	190	449	449	519	194	41	243	243	236	229	401	375	440	216	162	186
gene:Zm00001d000154	0	0	0	0	0	0	0	0	0	0	0	0	0	0	0	0	0	0	0	0	0	0	0	0	0	0	0	0	0	0	0	0	0	0	0	0
gene:Zm00001d000156	0	0	0	0	0	0	0	0	0	0	0	0	0	0	0	0	0	0	0	0	0	0	0	1	0	0	0	0	0	0	2	0	0	0	0	0
gene:Zm00001d000157	0	0	0	0	0	0	0	0	0	0	0	0	0	0	0	0	0	0	0	0	0	0	0	0	0	0	0	0	0	0	0	0	0	0	0	0
gene:Zm00001d000158	114	90	72	20	57	51	116	178	120	65	42	61	29	47	28	155	177	164	123	112	107	47	43	32	180	39	253	96	58	63	42	38	41	146	121	123
gene:Zm00001d000159	0	0	0	0	0	0	0	0	0	0	0	0	0	0	0	0	0	0	0	0	0	0	0	0	0	0	0	0	0	0	0	0	0	0	0	0
gene:Zm00001d000160	0	0	0	1	0	2	0	0	1	0	1	1	0	3	1	2	4	1	0	1	0	0	1	1	0	0	0	1	0	0	1	0	3	0	0	0
gene:Zm00001d000161	0	0	0	0	0	0	0	0	0	0	0	0	0	0	0	0	0	0	0	0	0	0	0	0	0	0	0	0	0	0	0	0	0	0	0	0
gene:Zm00001d000162	0	0	0	0	0	0	0	1	0	0	0	0	0	0	0	0	0	0	0	0	0	0	0	1	0	0	0	0	0	0	0	0	0	0	0	0
gene:Zm00001d000163	0	0	0	0	0	1	0	0	0	0	0	0	0	0	0	0	0	0	0	0	0	0	0	0	0	0	0	0	0	0	0	0	0	0	0	0
gene:Zm00001d000164	3183	3032	3216	1822	4456	4096	3403	4842	3070	3121	3175	3170	3733	4463	4069	4776	4875	4397	2627	2512	2779	3467	3345	3565	5199	1264	6326	2663	2789	2618	3523	3390	3836	3640	3366	3569
gene:Zm00001d000165	1	3	3	1	12	13	2	0	2	6	4	4	8	13	6	1	0	6	1	0	2	11	14	18	1	0	2	3	2	3	14	10	12	2	4	2
gene:Zm00001d000166	275	280	266	160	451	444	303	478	252	290	303	305	443	509	417	497	485	469	332	327	357	510	479	526	627	126	875	336	344	369	542	512	588	623	516	561
gene:Zm00001d000168	3	3	5	20	52	61	8	18	6	6	10	4	38	57	42	8	18	15	4	5	5	89	87	81	32	9	37	7	3	7	40	39	59	30	23	39
gene:Zm00001d000169	859	875	937	245	654	601	323	511	273	1126	1090	1111	715	791	732	521	519	451	849	776	921	610	566	633	916	217	1210	1004	1192	1142	904	833	942	855	783	1077
gene:Zm00001d000170	43	40	36	25	48	49	16	28	22	60	61	53	50	66	57	39	38	32	43	34	44	55	38	42	36	12	46	42	61	63	47	53	60	38	25	43
gene:Zm00001d000174	0	0	0	0	0	0	0	0	0	0	0	0	0	0	0	0	0	0	0	0	0	0	0	0	0	0	0	0	0	0	0	0	0	0	0	0
gene:Zm00001d000175	125	119	135	6	17	15	64	105	48	44	32	37	10	14	18	50	64	55	119	109	155	21	25	20	101	35	141	74	28	25	10	13	18	74	57	73
gene:Zm00001d000176	71	60	59	0	2	0	188	357	223	17	21	33	1	3	7	782	826	703	72	71	90	1	2	3	248	79	332	50	9	16	4	3	4	349	343	459
gene:Zm00001d000178	480	468	488	234	578	583	360	494	305	563	572	546	522	621	588	543	504	497	237	200	242	226	190	225	185	37	251	262	277	339	278	276	289	234	218	213
gene:Zm00001d000179	86	76	77	9	22	21	5	7	0	7	10	4	35	39	45	11	19	16	33	31	34	24	20	22	15	0	7	17	9	2	38	36	32	23	12	12
gene:Zm00001d000180	9	3	4	4	7	8	3	2	3	2	3	7	3	5	2	2	4	3	7	1	6	5	2	5	1	0	2	5	0	0	3	3	1	2	0	1
gene:Zm00001d000181	0	0	0	0	0	0	0	0	0	0	0	0	0	0	0	0	0	0	0	0	0	0	0	0	0	0	0	0	0	0	0	0	0	0	0	0
gene:Zm00001d000183	761	737	777	1211	3067	2637	1646	2442	1538	1156	1143	1200	1995	2404	2211	2105	2362	2095	1132	1113	1158	2954	2702	2987	2778	750	3578	1144	1221	1279	2403	2185	2710	2592	2274	2944
gene:Zm00001d000184	327	275	337	269	629	582	1065	1434	790	260	266	279	509	541	514	1609	1524	1381	368	370	357	550	475	564	1532	318	2164	286	245	215	574	573	573	1283	1148	1079
gene:Zm00001d000185	0	0	0	0	0	0	0	0	0	0	0	0	0	0	0	0	0	0	0	0	0	0	0	0	0	0	0	0	0	0	0	0	0	0	0	0
gene:Zm00001d000186	0	0	0	0	0	0	0	0	0	0	0	0	0	0	0	0	0	0	0	0	0	0	0	0	0	0	0	1	0	0	0	0	1	0	0	0
gene:Zm00001d000188	0	0	0	0	0	0	0	0	0	0	0	0	0	0	0	0	0	0	0	0	0	0	0	0	0	0	0	0	0	0	0	0	0	0	0	0
gene:Zm00001d000189	0	0	0	0	0	0	0	0	0	0	0	0	0	0	0	0	0	0	0	0	0	0	0	0	0	0	0	0	0	0	0	0	0	0	0	0
gene:Zm00001d000191	1095	1117	1137	699	1690	1525	831	1336	786	1308	1189	1314	1446	1732	1559	1474	1454	1345	1180	1056	1226	1674	1636	1754	1202	284	1720	1385	1610	1599	1923	1762	1904	1577	1466	1926
gene:Zm00001d000193	0	1	0	8	33	17	2	2	0	12	13	18	46	43	42	1	0	0	1	0	0	18	16	22	1	0	4	15	29	29	19	24	20	0	0	0
gene:Zm00001d000194	0	0	0	0	0	0	0	0	0	0	0	0	0	0	0	0	0	0	0	0	0	0	0	0	0	0	0	0	0	0	0	0	0	0	0	0
gene:Zm00001d000195	0	0	0	0	1	1	3	0	0	1	2	0	0	0	0	4	1	3	2	0	2	4	3	3	1	0	4	0	1	4	1	0	1	0	5	3
gene:Zm00001d000196	1	3	0	6	14	9	5	6	1	17	11	6	16	14	13	16	15	15	7	10	9	11	13	13	1	1	4	15	13	14	14	20	22	8	5	10
gene:Zm00001d000197	357	441	413	96	172	162	107	200	127	235	278	269	152	154	152	158	173	121	240	243	242	156	134	150	162	49	152	189	180	152	148	120	125	181	147	150
gene:Zm00001d000199	535	508	527	170	467	377	398	630	381	336	336	338	396	459	418	718	737	652	583	581	602	338	361	377	953	242	1418	457	422	387	440	453	483	739	692	830
gene:Zm00001d000200	0	0	0	0	0	0	0	0	0	0	0	0	0	0	0	0	0	0	0	0	0	0	0	0	0	0	0	0	0	0	0	0	0	0	0	0
gene:Zm00001d000202	0	0	0	0	0	0	0	0	0	1	0	1	0	1	0	0	0	0	0	0	0	0	0	0	0	0	0	0	0	0	2	2	2	1	2	0
gene:Zm00001d000203	0	0	0	0	0	0	0	0	0	0	0	0	0	0	0	0	0	0	0	0	0	0	0	0	0	0	1	0	0	0	0	0	0	0	1	0
gene:Zm00001d000204	26	22	23	6	11	17	12	16	5	9	16	7	8	14	7	6	7	8	51	66	55	95	86	70	182	49	190	40	17	11	79	106	116	170	133	175
gene:Zm00001d000205	41	32	52	49	120	123	46	74	40	62	88	50	101	123	134	125	102	94	113	96	111	244	238	241	185	49	269	150	121	156	230	192	235	195	147	203
gene:Zm00001d000208	0	0	0	0	0	0	0	0	0	0	0	0	0	0	0	0	0	0	0	0	0	0	0	0	0	0	0	0	0	0	0	0	0	0	0	0
gene:Zm00001d000209	0	0	0	0	0	0	0	0	0	0	0	0	0	0	1	0	0	0	0	0	0	0	0	0	0	0	0	0	0	0	0	0	0	0	0	0
gene:Zm00001d000211	0	0	0	0	0	0	0	0	0	0	0	0	0	0	0	1	0	0	0	0	0	0	0	0	0	0	0	0	0	0	0	0	0	0	0	0
gene:Zm00001d000213	26	23	21	33	63	47	5	7	7	29	35	21	69	81	76	16	12	14	25	23	32	167	145	182	18	5	34	48	67	73	198	183	200	25	17	36
gene:Zm00001d000214	1	0	1	0	1	0	0	0	0	4	4	10	0	2	3	0	0	0	63	65	68	10	5	16	0	0	1	269	487	490	14	20	21	0	0	1
gene:Zm00001d000216	0	0	0	1	0	0	0	0	0	1	0	0	0	0	0	0	0	0	0	0	0	0	0	0	0	0	0	0	0	0	0	0	0	0	0	0
gene:Zm00001d000217	0	0	0	0	0	0	0	0	0	0	0	0	0	0	0	0	0	0	0	0	0	0	0	0	0	0	0	0	0	0	0	0	0	0	0	0
gene:Zm00001d000219	0	0	1	0	0	0	0	0	0	0	0	0	0	0	0	0	0	0	0	0	2	0	0	0	0	0	0	0	0	0	0	0	0	0	0	0
gene:Zm00001d000220	7	3	2	25	63	69	1	5	1	14	17	17	58	74	68	4	5	5	3	2	2	32	46	29	1	1	4	7	21	17	43	42	42	1	7	4
gene:Zm00001d000221	0	0	0	0	0	0	0	0	0	0	0	0	0	0	0	0	0	0	0	0	0	0	0	2	0	0	0	0	0	0	0	0	0	0	0	0
gene:Zm00001d000222	1080	1005	1144	2245	5362	4631	591	809	513	3847	3888	3819	4627	5089	5156	1460	1489	1371	951	932	1009	3819	3372	3700	669	207	724	2635	4564	4322	6972	6886	7639	1092	949	956
gene:Zm00001d000223	130	117	132	81	210	223	76	159	102	142	139	157	186	217	191	163	182	147	153	125	127	231	213	241	184	39	317	172	192	198	249	262	285	191	195	202
gene:Zm00001d000224	105	103	98	10	26	22	38	45	32	105	98	100	28	28	39	36	37	29	154	140	172	22	13	24	29	14	31	127	102	98	30	36	42	37	31	32
gene:Zm00001d000226	96	92	115	66	172	160	64	134	72	103	103	128	128	175	138	114	116	143	97	119	118	169	140	156	148	39	210	117	128	143	174	156	172	120	128	175
gene:Zm00001d000227	970	1001	1100	441	1017	981	544	795	486	784	828	759	895	994	949	864	915	766	728	673	774	1029	925	990	622	177	614	723	759	693	1016	985	1067	925	812	814
gene:Zm00001d000228	241	236	214	170	420	305	235	341	222	210	216	241	334	439	335	316	329	314	335	300	388	533	471	477	552	142	837	311	355	373	509	387	521	438	381	616
gene:Zm00001d000229	17	25	22	24	41	46	42	70	39	16	26	21	68	77	77	132	118	126	12	10	20	73	71	93	92	21	116	18	12	18	58	76	99	106	75	70
gene:Zm00001d000230	819	758	854	297	608	572	270	405	241	842	747	812	521	573	535	514	493	491	1134	1153	1274	861	792	871	755	203	870	1184	1222	1231	912	919	1029	706	640	728
gene:Zm00001d000231	0	0	0	0	3	0	0	0	1	0	0	1	1	1	0	1	1	2	0	0	2	0	0	0	2	0	3	0	0	1	1	1	1	1	2	1
gene:Zm00001d000232	0	0	0	0	0	0	0	0	0	0	0	0	0	0	0	0	0	0	0	0	0	0	0	0	0	0	0	0	0	0	0	0	0	0	0	0
gene:Zm00001d000233	0	0	0	0	0	0	0	0	0	1	0	0	0	0	0	0	0	0	0	0	0	0	0	0	0	0	0	0	0	0	0	0	0	0	0	0
gene:Zm00001d000235	0	0	0	0	0	0	0	0	0	0	0	0	0	0	0	0	0	0	0	0	0	1	0	0	0	0	0	0	1	0	0	0	0	0	0	0
gene:Zm00001d000236	1	0	0	0	0	0	0	0	0	0	0	0	0	0	0	0	0	0	0	0	0	0	2	0	0	0	1	0	0	0	1	0	0	0	0	0
gene:Zm00001d000237	38	46	39	25	37	37	29	30	13	43	42	50	31	27	23	39	29	31	60	63	74	44	32	44	36	9	42	51	30	30	49	56	47	48	37	39
gene:Zm00001d000238	2	0	1	0	5	5	3	6	2	2	0	0	1	3	4	5	5	4	1	1	3	1	4	5	11	3	1	1	0	1	2	2	1	4	1	8
gene:Zm00001d000240	366	339	367	150	397	358	241	397	262	311	287	278	322	376	350	474	505	464	337	300	326	447	388	432	457	105	851	339	304	294	451	397	461	478	457	442
gene:Zm00001d000241	43	49	35	65	182	146	13	20	10	39	41	67	132	141	121	33	21	30	35	29	42	168	137	132	39	11	35	51	38	41	142	131	163	30	33	29
gene:Zm00001d000242	0	0	1	1	1	0	0	0	0	1	0	0	2	0	0	0	1	0	1	0	0	0	0	0	0	0	0	0	0	0	0	0	0	0	0	0
gene:Zm00001d000243	0	0	0	0	0	0	0	0	0	0	0	0	0	0	0	0	0	0	0	0	0	0	0	0	0	0	0	0	0	0	0	0	0	0	0	0
gene:Zm00001d000247	97	101	108	82	188	149	74	130	73	131	125	149	172	175	164	216	206	162	77	81	88	144	126	145	84	34	103	90	88	89	177	178	166	103	75	125
gene:Zm00001d000250	2	4	6	3	3	4	4	3	4	3	9	7	3	3	3	2	4	2	0	0	0	0	0	0	0	0	0	0	0	0	0	0	0	0	0	0
gene:Zm00001d000254	0	1	1	0	1	0	0	0	0	0	0	0	1	1	1	0	0	0	1	0	1	0	1	0	0	0	0	1	0	0	0	1	1	3	0	0
gene:Zm00001d000255	0	12	0	0	0	0	10	0	0	0	4	0	0	0	0	0	0	1	8	7	5	7	4	3	0	0	5	16	31	20	6	7	9	4	5	8
gene:Zm00001d000256	0	0	0	0	0	0	0	0	0	0	0	0	0	0	0	2	0	0	0	0	0	0	0	0	0	0	0	0	0	0	0	0	1	0	0	0
gene:Zm00001d000257	360	393	395	406	1040	892	308	403	237	539	508	541	903	982	991	543	490	468	372	365	343	1305	1186	1416	528	95	675	511	617	635	1343	1262	1407	694	637	686
gene:Zm00001d000260	40	48	54	753	43	36	567	47	779	62	33	38	60	67	41	42	56	62	65	33	66	43	48	41	143	1249	132	56	62	68	59	63	65	62	60	83
gene:Zm00001d000270	76	95	91	956	110	110	719	108	1080	149	86	131	140	156	127	97	134	110	177	118	134	96	97	108	201	1041	432	113	114	126	113	87	139	110	97	102
gene:Zm00001d000272	0	0	0	0	0	0	0	0	0	0	0	0	0	0	0	0	0	0	0	0	0	0	0	0	0	0	0	0	0	0	0	0	0	0	0	0
gene:Zm00001d000277	3	4	4	68	6	3	53	7	85	10	12	8	5	7	4	11	8	6	9	7	5	4	5	5	20	135	33	5	8	13	9	4	10	10	4	11
gene:Zm00001d000279	0	0	0	0	0	0	0	0	0	0	0	0	0	0	0	0	0	0	0	0	0	0	0	0	0	0	0	0	0	0	0	0	0	0	0	0
gene:Zm00001d000282	0	0	0	0	0	0	0	0	0	0	0	0	0	0	0	0	0	0	0	0	0	0	0	0	0	0	0	0	0	0	0	0	0	0	0	0
gene:Zm00001d000288	1	1	1	0	0	0	1	0	0	2	2	2	1	1	1	0	0	0	5	0	5	2	3	3	2	0	2	7	8	9	0	5	1	1	1	3
gene:Zm00001d000291	11	9	11	4	8	9	4	6	6	15	20	21	13	9	9	3	4	2	5	12	6	4	4	6	6	3	20	14	9	6	8	4	14	4	1	5
gene:Zm00001d000293	15	12	17	9	13	14	12	20	7	12	15	11	22	23	18	19	22	26	19	22	30	29	14	23	42	3	56	13	17	17	22	28	16	29	23	25
gene:Zm00001d000294	23	25	30	22	39	32	82	94	66	120	89	117	80	97	103	431	477	395	117	123	123	283	253	222	175	47	169	123	150	106	541	593	600	423	356	422
gene:Zm00001d000295	471	490	557	235	600	532	285	419	223	370	348	358	490	574	531	458	446	415	383	394	395	671	613	666	398	86	500	375	337	365	715	646	703	500	481	452
gene:Zm00001d000296	0	0	0	0	0	0	0	0	0	0	0	0	0	0	0	0	0	0	0	0	0	0	0	0	0	0	0	0	0	0	0	0	0	0	0	0
gene:Zm00001d000297	0	0	0	0	0	0	0	0	0	0	0	0	0	0	0	0	0	0	0	0	0	0	0	0	0	0	0	0	0	0	0	0	0	0	0	0
gene:Zm00001d000298	1	0	0	4	11	6	22	35	22	1	2	1	3	10	4	41	42	34	4	5	5	106	97	114	60	16	109	5	14	16	60	55	63	85	76	55
gene:Zm00001d000299	382	352	421	471	1175	1042	777	1167	637	736	720	730	909	1016	869	971	906	879	1003	889	984	1657	1673	1774	2361	568	2637	1121	1331	1225	1518	1400	1691	1838	1644	2217
gene:Zm00001d000300	9196	8879	9529	1754	4318	4102	2180	3192	1850	7139	7041	7146	3514	3875	3797	2738	2598	2405	6723	6239	6852	3129	3094	3500	2906	693	3554	7042	7249	7165	3919	3769	3962	2902	2757	2595
gene:Zm00001d000301	52	59	64	63	141	137	64	113	50	53	57	61	124	147	155	110	100	77	46	46	66	101	87	96	107	27	132	65	43	69	81	95	115	74	63	69
gene:Zm00001d000302	1762	1964	1967	1458	3493	3171	3328	4654	2924	1867	1714	1901	2945	3475	3194	6333	6573	5906	2278	2152	2243	3817	3455	3815	5872	1497	7710	1937	1786	1814	3911	3818	4326	7085	6271	6896
gene:Zm00001d000303	0	0	0	0	0	0	0	0	0	0	0	0	0	0	0	0	0	0	0	0	2	0	1	1	1	0	0	0	0	1	2	0	2	0	0	0
gene:Zm00001d000304	0	2	2	1	4	3	5	7	6	0	0	0	5	7	5	5	7	4	0	2	0	1	0	2	0	0	0	1	0	0	4	0	1	0	0	1
gene:Zm00001d000305	31	16	40	24	82	72	24	40	22	22	34	39	54	82	69	43	47	50	65	45	48	187	140	188	130	31	161	58	58	50	202	181	199	154	137	133
gene:Zm00001d000306	36	27	43	27	78	78	29	49	25	52	46	29	48	78	65	40	58	60	0	1	0	0	0	0	0	0	0	0	0	0	0	0	0	1	1	1
gene:Zm00001d000307	200	155	176	78	186	148	162	240	155	141	127	146	142	160	163	202	203	214	147	107	124	120	113	141	225	43	234	140	98	104	137	132	150	207	160	176
gene:Zm00001d000308	7	9	10	5	6	4	21	24	19	4	9	6	3	3	3	40	47	34	15	8	8	1	5	1	17	14	17	2	2	4	8	2	7	14	19	15
gene:Zm00001d000310	1277	1249	1428	86	158	147	370	550	324	293	329	342	122	140	150	690	633	576	902	853	970	173	138	155	365	127	365	698	377	350	173	170	172	610	507	503
gene:Zm00001d000311	166	168	156	127	323	260	68	122	62	177	229	194	279	326	275	156	156	141	153	139	153	299	272	343	197	42	231	161	203	212	337	302	330	138	144	165
gene:Zm00001d000312	53	59	54	46	121	80	60	80	35	87	86	108	77	89	106	76	73	90	95	97	119	101	98	94	65	20	63	109	132	103	110	88	128	91	74	82
gene:Zm00001d000313	256	226	249	167	365	421	194	285	168	404	378	379	355	432	388	292	278	245	444	400	432	377	399	414	432	110	571	493	482	488	403	423	491	384	301	390
gene:Zm00001d000314	28	24	17	11	33	23	11	23	10	20	24	14	27	25	31	13	18	15	9	13	16	33	40	26	22	7	25	5	20	21	30	27	43	20	23	21
gene:Zm00001d000315	0	0	0	0	0	0	0	0	0	0	0	0	0	0	0	0	0	0	0	0	0	0	0	0	0	0	0	0	0	0	0	0	0	0	0	0
gene:Zm00001d000316	294934	276101	292927	77130	204332	180554	212132	324587	191411	207548	200802	208719	154733	168972	165465	312799	320814	287156	222608	203535	221230	164539	155793	164625	199843	48254	219283	185430	166585	152246	183781	179228	196538	254996	230357	290299
gene:Zm00001d000317	0	0	0	0	0	0	0	0	0	0	0	0	0	0	0	0	0	0	0	0	0	0	0	0	0	0	0	0	0	0	0	0	0	0	0	0
gene:Zm00001d000318	0	0	1	0	0	0	0	1	0	1	0	0	0	0	0	2	0	0	25	16	29	31	40	32	11	2	18	18	19	24	35	42	41	29	21	33
gene:Zm00001d000319	2	6	3	0	5	4	4	2	4	4	5	6	6	4	4	6	1	3	6	3	11	11	2	8	8	3	4	4	6	11	8	3	5	5	6	2
gene:Zm00001d000320	0	0	0	1	1	2	0	0	0	0	0	0	2	0	1	1	0	0	0	0	2	0	1	1	1	0	0	0	0	0	1	1	3	0	1	1
gene:Zm00001d000321	0	0	0	0	0	0	0	0	0	0	0	0	0	0	0	0	0	0	0	0	0	0	0	0	0	0	0	0	0	0	0	0	0	0	0	0
gene:Zm00001d000322	0	0	0	0	0	0	0	0	0	0	0	0	0	0	0	0	0	0	0	0	0	0	0	0	0	0	0	0	0	0	0	0	0	0	0	0
gene:Zm00001d000324	0	0	0	0	0	0	0	0	0	0	0	0	0	0	0	0	0	0	0	0	0	0	0	0	0	0	0	0	0	0	0	0	0	0	0	0
gene:Zm00001d000325	0	0	0	0	0	0	0	0	0	0	0	0	0	0	0	0	0	0	0	0	0	0	0	0	0	0	0	0	0	0	0	0	0	0	0	0
gene:Zm00001d000326	0	0	0	0	0	0	0	0	0	0	0	0	0	0	0	0	0	0	0	0	0	0	0	0	0	0	0	0	0	0	0	0	0	0	0	0
gene:Zm00001d000327	0	0	0	0	0	0	0	0	0	0	0	0	0	0	0	0	0	0	0	0	0	0	0	0	0	0	0	0	0	0	0	0	0	0	0	0
gene:Zm00001d000328	449	355	392	354	910	824	430	762	381	533	522	538	778	1007	794	550	616	612	324	324	348	459	448	505	402	86	508	388	438	461	470	438	520	358	337	373
gene:Zm00001d000329	60	57	56	104	267	230	196	266	180	77	75	62	178	211	169	250	282	279	90	85	117	287	322	305	594	139	841	113	136	148	236	248	304	394	335	522
gene:Zm00001d000330	0	0	0	0	0	1	0	0	0	0	0	0	0	0	0	0	0	0	0	0	0	0	0	0	0	0	0	0	0	0	0	0	0	0	0	0
gene:Zm00001d000331	0	0	0	0	0	0	0	0	0	0	0	0	0	0	0	0	0	0	0	0	0	0	0	0	0	0	0	0	0	0	0	0	0	0	0	0
gene:Zm00001d000332	0	0	0	0	0	0	0	1	0	0	0	0	0	0	0	0	1	1	0	0	0	0	0	0	0	0	0	0	0	0	0	0	0	0	0	0
gene:Zm00001d000333	0	0	0	0	0	0	0	0	0	0	0	0	0	0	0	0	0	0	0	0	0	0	0	0	0	0	0	0	0	0	0	0	0	0	0	0
gene:Zm00001d000335	0	0	0	0	0	0	0	0	0	0	0	0	0	0	0	0	0	0	0	0	0	0	0	0	0	0	0	0	0	0	0	0	0	0	0	0
gene:Zm00001d000337	0	0	0	0	0	0	0	0	0	0	0	0	0	0	0	0	0	0	0	0	0	0	0	0	0	0	0	0	0	0	0	0	0	0	0	0
gene:Zm00001d000339	42	29	42	10	9	14	33	45	41	8	11	12	12	15	17	96	84	59	27	31	43	33	24	31	46	13	52	26	18	15	20	31	35	57	51	41
gene:Zm00001d000343	0	0	0	0	0	0	0	0	0	0	0	0	0	0	0	0	0	0	0	0	0	0	0	0	0	0	0	0	0	0	0	0	0	0	0	0
gene:Zm00001d000344	2	2	3	0	9	4	5	3	3	1	2	0	0	0	0	2	5	3	0	0	1	0	0	0	0	0	0	0	0	0	0	0	0	0	0	0
gene:Zm00001d000345	77	74	62	33	82	66	31	41	27	80	93	70	73	86	73	40	50	37	70	40	60	96	73	69	72	11	81	78	78	62	78	116	80	54	50	47
gene:Zm00001d000346	112	88	86	49	92	73	72	92	81	73	73	81	75	86	50	82	85	83	87	90	94	68	77	71	138	37	179	64	83	83	72	50	72	113	107	128
gene:Zm00001d000347	0	0	0	0	0	0	0	0	0	0	0	0	0	0	0	0	0	0	0	0	0	0	0	0	0	0	0	0	0	0	0	0	0	0	0	0
gene:Zm00001d000349	1327	1300	1345	668	1692	1518	942	1349	687	1388	1230	1272	1356	1631	1465	1468	1412	1339	1254	1190	1203	1309	1281	1438	1450	368	1929	1150	1232	1215	1450	1456	1574	1162	1106	1176
gene:Zm00001d000350	1352	1298	1407	635	1632	1539	813	1301	729	1269	1271	1344	1330	1481	1466	1426	1379	1360	1198	1047	1063	1428	1193	1414	480	83	620	1176	1262	1218	1470	1508	1543	1326	1085	1192
gene:Zm00001d000351	0	0	0	0	0	0	0	0	0	0	0	0	0	1	0	0	0	0	0	0	0	0	0	0	0	0	0	0	0	0	0	0	0	0	0	0
gene:Zm00001d000352	0	0	0	0	0	0	2	0	0	0	3	0	0	0	1	0	0	1	0	0	1	1	1	0	0	0	1	0	0	0	0	5	1	1	0	1
gene:Zm00001d000355	0	0	0	0	0	0	0	0	0	0	0	0	0	0	0	0	0	0	0	0	0	0	0	0	0	0	0	0	0	0	0	0	0	0	0	0
gene:Zm00001d000357	349	318	345	105	222	269	207	328	157	170	151	169	192	272	246	373	415	352	252	278	313	253	273	326	364	78	543	232	205	228	316	298	334	402	356	431
gene:Zm00001d000358	652	590	588	130	356	349	446	618	339	109	103	130	285	350	350	615	715	618	300	303	311	312	223	291	716	232	785	186	98	79	267	262	360	564	545	611
gene:Zm00001d000360	163	143	140	97	195	173	100	154	89	137	145	157	167	176	167	154	174	136	100	88	98	95	81	88	154	29	218	110	112	104	138	114	120	81	103	106
gene:Zm00001d000361	67	64	93	30	95	83	55	74	42	60	59	66	79	81	70	78	96	72	94	101	86	89	86	103	111	23	196	90	97	84	134	96	114	108	94	104
gene:Zm00001d000362	0	0	0	0	0	0	0	0	0	0	0	0	0	0	0	0	0	0	0	0	0	0	0	0	0	0	0	0	0	0	0	0	0	0	0	0
gene:Zm00001d000363	0	0	0	0	0	0	0	0	0	0	0	0	0	0	0	0	0	0	0	0	0	0	0	0	0	0	0	0	0	0	0	0	0	0	0	0
gene:Zm00001d000364	6	2	6	3	11	9	5	5	3	5	10	8	7	5	8	3	11	7	0	0	0	0	0	0	0	0	0	0	0	0	0	0	0	0	0	0
gene:Zm00001d000365	0	0	0	0	0	0	0	0	0	0	0	0	0	0	0	0	0	0	0	0	0	0	0	0	0	0	0	0	0	0	0	0	0	0	0	0
gene:Zm00001d000366	0	0	1	1	0	0	0	1	1	0	0	1	0	1	0	0	0	0	0	0	0	0	0	0	0	0	0	0	0	0	0	0	0	0	0	0
gene:Zm00001d000367	0	0	0	0	0	0	0	0	0	0	0	0	0	0	0	0	0	0	0	0	0	0	0	0	0	0	0	0	0	0	0	0	0	0	0	0
gene:Zm00001d000368	0	0	0	0	0	0	0	0	0	0	0	0	0	0	0	0	0	0	2	6	3	5	4	6	1	0	5	8	2	4	0	1	2	2	0	10
gene:Zm00001d000370	163	141	152	89	198	184	119	188	142	157	133	151	177	216	183	207	234	202	194	193	226	220	212	214	172	58	221	196	163	175	227	182	243	179	178	239
gene:Zm00001d000371	0	0	0	0	0	0	0	0	0	0	0	0	0	0	0	0	0	0	0	0	0	0	0	0	0	0	0	0	0	0	0	0	0	0	0	0
gene:Zm00001d000373	1	0	0	0	1	0	0	0	0	0	0	0	0	0	2	0	0	0	0	1	0	0	0	1	0	0	0	0	0	0	0	0	0	0	0	1
gene:Zm00001d000377	2	0	1	0	1	0	0	0	0	0	0	0	1	0	0	0	0	0	0	1	0	0	1	0	0	0	0	0	0	0	1	0	1	0	1	1
gene:Zm00001d000379	210	186	223	85	236	208	99	188	90	202	190	180	176	226	201	205	239	153	166	155	167	247	218	256	246	48	291	203	204	181	227	257	287	234	207	214
gene:Zm00001d000380	2	1	1	0	5	1	7	9	4	0	1	2	2	5	1	4	4	7	1	1	0	4	2	2	10	1	6	1	1	0	1	1	3	7	10	5
gene:Zm00001d000381	443	437	467	8	31	19	12	15	10	23	17	25	36	36	31	36	24	22	75	68	72	18	26	20	27	7	41	45	7	11	36	28	40	26	33	26
gene:Zm00001d000382	347	386	366	292	809	672	269	443	228	454	424	506	596	648	627	495	467	477	25	16	14	81	63	67	47	7	41	37	52	42	104	90	109	33	26	45
gene:Zm00001d000383	0	0	0	0	0	0	0	0	0	0	0	0	0	0	0	0	0	0	0	0	0	0	0	0	0	0	0	0	0	0	0	0	0	0	0	0
gene:Zm00001d000384	0	0	0	0	0	0	0	0	0	0	0	0	0	0	0	0	0	0	0	0	0	0	0	0	0	0	0	0	0	0	0	0	0	0	0	0
gene:Zm00001d000385	0	0	0	0	0	0	0	0	0	0	0	0	0	0	0	0	0	0	0	0	0	0	0	0	0	0	0	0	0	0	0	0	0	0	0	0
gene:Zm00001d000387	0	0	0	0	2	1	2	4	0	0	0	1	1	0	1	2	0	3	0	0	0	0	0	0	0	0	1	0	0	2	0	0	1	0	1	0
gene:Zm00001d000388	0	0	0	0	0	0	0	0	0	0	0	0	0	0	0	0	0	0	0	0	0	0	0	0	0	0	0	0	0	0	0	0	0	0	0	0
gene:Zm00001d000389	0	2	0	0	0	0	0	0	1	0	1	0	1	0	0	1	0	0	0	1	5	0	0	0	1	0	0	0	0	0	0	0	0	0	0	0
gene:Zm00001d000390	10	15	12	5	13	5	4	12	4	10	5	15	12	15	10	8	8	7	16	9	10	9	11	12	6	4	4	4	10	10	14	11	17	6	5	9
gene:Zm00001d000391	127	138	143	80	201	186	116	155	103	176	145	161	180	238	206	231	242	222	127	120	135	197	198	201	323	80	472	131	169	188	282	229	303	193	187	275
gene:Zm00001d000392	0	0	0	0	0	0	0	0	0	0	0	0	0	0	0	0	0	0	0	0	0	0	0	0	0	0	0	0	0	1	0	0	0	0	0	0
gene:Zm00001d000394	0	0	0	0	0	0	0	0	0	0	0	0	0	0	0	0	0	0	0	0	0	0	0	0	0	0	0	0	0	0	0	0	0	0	0	0
gene:Zm00001d000395	0	0	0	0	0	0	0	0	0	0	0	0	0	0	0	0	0	0	0	0	0	0	0	0	0	0	0	0	0	0	0	0	0	0	0	0
gene:Zm00001d000396	470	432	443	329	874	749	1224	1733	968	287	284	298	643	731	713	2086	2169	1955	395	380	408	781	712	741	1663	420	1872	310	217	216	827	823	923	1611	1567	1580
gene:Zm00001d000397	0	0	0	0	0	0	0	0	0	0	0	0	0	0	0	0	0	0	0	0	0	0	0	0	0	0	0	0	0	0	0	0	0	0	0	0
gene:Zm00001d000398	0	0	0	0	0	0	0	0	0	0	0	0	0	0	0	0	0	0	0	0	0	0	0	0	0	0	0	0	0	0	0	0	0	0	0	0
gene:Zm00001d000399	1711	1745	1790	1415	3618	3386	317	444	265	1268	1139	1193	2666	2944	2956	554	544	487	1154	1081	1139	2778	2675	2914	368	70	418	1015	879	902	2684	2486	2722	889	762	777
gene:Zm00001d000400	0	0	0	0	0	0	0	0	0	0	0	0	0	0	0	0	0	0	0	0	0	0	0	0	0	0	0	0	0	0	0	0	0	0	0	0
gene:Zm00001d000401	705	718	765	450	1222	1053	118	184	78	1836	1688	1792	937	1124	1032	172	195	152	817	749	832	1153	1083	1220	262	58	269	1564	2104	2253	1355	1374	1556	229	208	285
gene:Zm00001d000402	3	2	5	8	13	15	6	4	6	1	2	4	8	19	20	9	11	6	3	8	0	22	21	21	9	3	25	7	6	5	25	24	24	16	15	13
gene:Zm00001d000403	564	557	594	455	1251	1122	432	647	360	686	761	770	1113	1347	1204	862	825	812	391	361	378	1163	1011	1206	663	180	1000	605	956	870	1317	1257	1402	653	555	548
gene:Zm00001d000406	0	0	0	0	0	0	0	0	0	0	0	0	0	0	0	0	0	0	0	0	0	0	0	0	0	0	0	0	0	0	0	0	0	0	0	0
gene:Zm00001d000407	289	328	333	50	108	105	252	396	226	141	149	157	85	88	69	321	342	266	305	257	283	181	137	135	569	163	751	263	256	251	100	125	91	548	456	552
gene:Zm00001d000408	82	82	83	70	147	138	98	123	79	52	39	43	124	167	163	136	153	135	90	88	84	237	189	222	317	77	327	67	48	55	236	237	279	312	219	238
gene:Zm00001d000409	1	0	0	0	0	0	0	0	0	0	0	0	0	0	0	0	0	0	0	0	0	0	0	0	0	0	0	0	0	0	1	1	1	1	0	0
gene:Zm00001d000410	0	0	0	0	0	0	0	0	0	0	0	0	0	0	0	0	0	0	0	0	0	0	0	0	0	0	0	0	0	0	0	0	0	0	0	0
gene:Zm00001d000411	0	0	0	0	0	0	0	0	0	0	0	0	0	0	0	0	0	0	0	0	0	0	0	0	0	0	0	0	0	0	0	0	0	0	0	0
gene:Zm00001d000412	0	0	0	0	0	0	0	0	0	0	0	0	0	0	0	0	0	0	0	0	0	3	3	0	0	0	0	1	0	0	2	1	0	1	1	1
gene:Zm00001d000413	0	0	0	0	0	0	0	0	0	0	0	0	0	0	0	0	0	0	0	0	0	0	0	0	0	0	0	0	0	0	0	0	0	0	0	0
gene:Zm00001d000414	0	0	0	0	0	0	0	0	0	0	0	0	0	0	0	0	0	0	0	0	0	0	0	0	0	0	0	0	0	0	0	0	0	0	0	0
gene:Zm00001d000417	1	1	0	8	1	0	4	0	7	1	1	0	0	0	0	0	1	1	0	0	0	0	1	1	3	8	5	0	1	0	0	0	1	0	4	0
gene:Zm00001d000418	0	0	0	0	0	0	0	0	1	0	0	0	0	0	0	0	0	0	0	0	0	0	0	0	0	0	0	0	0	0	0	0	0	0	0	0
gene:Zm00001d000419	354	310	344	168	357	302	225	364	210	361	345	395	300	327	321	360	357	348	301	301	318	348	269	320	153	47	210	362	430	400	387	350	379	350	355	398
gene:Zm00001d000422	0	0	0	0	0	0	0	0	0	0	0	0	0	0	0	0	0	0	2	2	4	1	0	1	0	1	0	0	1	0	0	2	2	1	0	0
gene:Zm00001d000424	128	118	131	75	168	152	42	61	39	185	182	192	160	159	146	138	120	110	187	171	232	181	139	172	71	27	68	227	224	254	183	168	181	109	81	83
gene:Zm00001d000425	0	0	0	1	6	0	0	0	0	0	0	0	0	0	0	0	0	0	0	1	0	0	0	0	0	0	0	0	0	0	0	0	0	0	0	0
gene:Zm00001d000428	49	54	45	59	145	138	22	48	22	68	51	55	122	133	117	82	76	66	26	24	28	184	176	184	92	24	78	46	62	63	168	175	185	89	56	70
gene:Zm00001d000429	0	0	0	0	0	0	0	0	0	0	0	0	1	1	0	0	0	0	0	1	1	0	0	0	0	0	1	1	1	1	0	0	1	0	0	0
gene:Zm00001d000430	658	593	624	423	1026	921	862	1318	775	522	488	484	736	1038	824	1241	1195	1096	622	587	622	906	864	932	1645	349	1986	589	609	593	759	755	864	1422	1211	1151
gene:Zm00001d000431	2	1	2	1	0	0	0	2	0	1	1	3	3	0	0	0	0	0	0	1	0	1	0	1	0	0	0	0	0	1	0	0	1	1	0	0
gene:Zm00001d000432	169	164	202	188	513	486	72	113	74	262	208	232	452	532	425	146	133	157	168	172	178	522	543	567	211	29	320	205	239	238	496	472	562	144	155	161
gene:Zm00001d000433	0	0	0	0	0	0	0	0	0	0	0	0	0	0	0	0	0	0	0	0	0	0	0	0	0	0	0	0	0	0	0	0	0	1	0	0
gene:Zm00001d000434	30	37	49	12	29	35	1	2	3	171	191	170	49	50	65	8	7	11	157	163	152	68	54	72	1	1	6	221	311	286	114	137	114	13	11	17
gene:Zm00001d000435	431	358	360	293	703	665	350	573	356	562	529	674	600	729	678	437	520	421	442	477	499	868	822	908	742	199	955	540	731	679	813	716	894	696	588	786
gene:Zm00001d000436	462	472	525	311	849	746	432	664	365	610	568	550	715	896	805	685	723	657	462	427	495	739	744	769	844	181	956	554	599	636	861	827	959	818	732	774
gene:Zm00001d000437	0	0	0	0	0	0	0	0	0	0	0	0	0	0	0	0	0	0	1	0	1	5	2	6	2	0	1	3	3	5	1	1	4	2	1	3
gene:Zm00001d000438	0	0	0	0	0	0	0	0	0	0	0	0	0	0	0	0	0	0	0	0	0	0	0	0	0	0	0	0	0	0	0	0	0	0	0	0
gene:Zm00001d000439	735	756	801	550	1431	1318	401	639	381	817	767	813	1110	1215	1126	717	719	621	713	715	737	1277	1045	1239	857	180	1055	803	814	811	1222	1130	1237	817	761	690
gene:Zm00001d000442	0	0	0	0	0	0	0	0	0	1	0	0	0	0	0	0	0	0	0	0	0	0	0	0	0	0	0	0	0	0	0	0	0	0	0	0
gene:Zm00001d000443	199	203	185	36	88	81	25	37	31	60	47	53	76	91	86	47	47	38	83	80	85	81	62	76	47	12	72	54	28	19	83	87	82	48	46	45
gene:Zm00001d000444	0	0	0	0	0	0	0	0	0	0	0	0	0	0	0	0	0	0	0	0	0	0	0	0	0	0	0	0	0	0	0	0	0	0	0	0
gene:Zm00001d000445	0	0	0	0	0	0	0	0	0	0	0	0	0	0	0	0	0	0	0	0	0	0	0	0	0	0	0	0	0	0	0	0	0	0	0	0
gene:Zm00001d000447	1	0	1	0	0	1	0	0	0	0	4	5	12	4	3	3	4	6	0	1	3	4	0	1	1	0	0	0	0	1	1	0	1	3	6	2
gene:Zm00001d000448	0	0	0	0	0	0	0	0	0	0	0	0	0	0	0	0	0	0	0	0	0	0	0	0	0	0	0	0	0	0	0	0	0	0	0	0
gene:Zm00001d000449	0	0	0	0	0	0	0	0	0	0	0	0	0	0	0	0	0	0	0	0	0	0	0	0	0	0	0	0	0	0	0	0	0	0	0	0
gene:Zm00001d000452	139	143	119	122	372	315	184	248	158	254	237	262	241	321	271	220	229	192	104	95	137	258	301	366	180	44	293	153	170	174	201	190	226	218	191	329
gene:Zm00001d000455	0	0	0	0	0	1	0	0	0	0	0	0	0	0	0	0	0	0	0	0	0	0	0	0	0	0	0	0	0	0	0	0	0	0	0	0
gene:Zm00001d000458	4	4	3	0	5	1	0	0	0	0	0	0	2	2	2	0	0	0	0	0	1	0	3	1	0	0	1	0	0	1	3	2	3	0	0	0
gene:Zm00001d000460	0	0	1	0	1	1	0	0	0	2	1	0	0	0	2	0	0	0	0	0	0	1	0	0	0	0	1	1	4	2	3	3	7	1	0	2
gene:Zm00001d001763	8	4	4	9	14	11	6	10	2	13	25	16	15	11	16	6	7	9	7	12	8	23	14	25	6	1	6	8	10	21	15	21	22	8	3	5
gene:Zm00001d001765	1515	1536	1549	539	1311	1185	524	762	427	1151	1091	1176	1257	1420	1360	932	914	858	1183	1225	1245	1583	1616	1727	940	217	1354	1207	1230	1273	1739	1682	1980	1220	1074	1255
gene:Zm00001d001766	160	148	178	97	185	205	112	161	78	121	147	139	152	195	203	197	178	172	174	190	224	225	186	195	126	44	83	144	133	137	171	180	214	113	122	129
gene:Zm00001d001767	23	28	21	6	9	10	7	10	3	15	14	12	20	19	10	7	4	7	4	0	1	1	1	0	0	1	1	1	3	2	1	3	2	0	2	2
gene:Zm00001d001769	1	0	0	0	0	2	1	0	0	3	2	5	3	2	2	3	2	5	3	1	4	15	13	11	7	2	7	3	0	5	10	3	6	2	2	4
gene:Zm00001d001770	47	50	48	65	127	132	53	101	71	74	61	71	111	136	113	98	130	125	14	13	31	31	36	30	52	12	97	37	19	16	27	28	32	32	44	49
gene:Zm00001d001771	40	35	49	21	39	43	16	32	27	13	40	25	30	36	42	27	27	19	30	28	41	31	36	33	26	8	9	30	20	25	44	52	64	31	28	14
gene:Zm00001d001772	2	0	1	1	0	2	0	0	0	1	2	3	1	0	0	0	0	1	1	2	0	0	1	1	0	0	0	1	2	2	1	1	1	0	0	0
gene:Zm00001d001773	8	7	5	14	36	43	2	1	6	40	40	38	51	56	45	21	19	14	14	11	14	46	52	48	7	2	19	24	37	26	53	47	57	8	6	10
gene:Zm00001d001774	20	18	24	8	8	13	2	5	4	69	58	59	19	21	20	39	46	52	69	75	98	36	37	33	14	2	12	97	110	100	64	47	53	17	13	11
gene:Zm00001d001775	0	0	0	0	0	0	0	0	0	0	0	0	0	0	0	0	0	0	0	0	0	0	0	0	0	0	0	0	0	0	0	0	0	0	0	0
gene:Zm00001d001776	2	0	2	0	0	0	0	0	1	0	0	1	1	0	0	0	0	0	1	1	0	0	0	0	0	0	0	0	0	0	1	0	0	0	0	2
gene:Zm00001d001777	0	0	0	0	0	0	0	0	0	0	0	0	0	0	0	0	0	0	0	0	0	0	0	0	0	0	0	0	0	0	0	0	0	0	0	0
gene:Zm00001d001779	5	4	2	0	1	0	1	4	3	1	1	0	1	1	0	0	1	1	16	18	17	50	49	55	54	20	58	26	31	23	34	45	54	56	51	43
gene:Zm00001d001780	453	405	460	131	365	344	153	223	120	444	365	398	320	359	335	184	210	176	303	266	277	379	341	299	298	54	435	329	384	344	416	370	406	266	268	285
gene:Zm00001d001781	268	279	280	198	430	408	211	339	232	340	343	343	390	512	445	380	418	382	498	559	566	720	618	748	451	129	531	748	962	939	925	881	1035	640	544	579
gene:Zm00001d001784	621	564	612	577	1344	1263	289	372	254	1377	1422	1432	1339	1519	1420	387	353	360	710	649	689	1053	998	1070	407	104	463	944	1329	1316	1209	1259	1348	435	386	431
gene:Zm00001d001785	17	13	21	4	21	24	4	6	8	25	18	7	35	51	43	11	13	13	8	5	8	19	12	21	2	1	5	6	12	8	19	30	21	5	8	8
gene:Zm00001d001786	132	98	104	44	129	106	56	61	41	84	71	77	143	114	131	93	85	83	65	60	59	108	106	85	106	13	142	59	53	59	146	124	158	106	121	137
gene:Zm00001d001787	237	237	284	346	777	735	278	339	214	405	364	378	678	767	623	403	376	416	256	257	218	642	672	700	463	91	597	272	379	360	564	552	645	390	392	340
gene:Zm00001d001788	3830	3700	3974	2072	5172	4701	2433	3796	2143	3974	3711	4025	4028	4690	4494	3810	3946	3624	3777	3398	3669	5703	5509	5634	5168	1236	5869	3802	4255	3763	6674	6273	7132	5397	4847	6368
gene:Zm00001d001789	643	644	642	495	1192	1217	456	728	423	884	786	876	1143	1289	1152	1044	1029	1027	351	311	300	704	631	735	461	98	934	413	434	543	813	827	822	499	442	450
gene:Zm00001d001790	203	206	249	159	407	400	146	201	126	330	343	342	389	454	441	255	248	212	257	275	290	481	405	448	344	85	476	351	457	465	540	542	585	337	364	357
gene:Zm00001d001791	1	1	0	0	0	0	0	1	0	1	5	1	1	1	3	0	0	0	2	2	0	0	1	0	0	0	0	2	3	1	7	11	6	0	2	2
gene:Zm00001d001792	0	0	0	0	0	0	0	0	0	0	0	0	0	0	0	0	0	0	0	0	0	0	0	1	0	0	0	0	0	0	0	0	0	0	0	0
gene:Zm00001d001793	1	0	0	0	0	0	1	2	0	0	0	0	0	1	0	1	0	1	2	2	1	0	0	2	2	1	3	0	0	0	0	1	0	0	0	0
gene:Zm00001d001796	0	0	0	0	0	14	0	0	0	0	0	0	0	0	1	2	0	0	0	0	0	7	0	0	3	0	0	0	0	0	2	8	0	0	0	5
gene:Zm00001d001797	28	33	22	25	60	46	17	30	11	41	39	43	53	80	58	43	37	23	26	26	14	76	59	83	48	12	84	26	35	44	58	60	72	30	31	50
gene:Zm00001d001798	164	184	171	121	285	274	144	217	119	201	240	229	272	282	269	216	215	182	161	188	180	304	306	301	304	54	372	200	267	307	327	294	350	266	229	222
gene:Zm00001d001799	82	81	97	16	72	75	20	18	20	66	53	58	59	60	73	36	54	39	137	91	138	79	68	83	56	18	101	86	49	61	82	67	72	49	47	54
gene:Zm00001d001800	137	141	143	78	187	174	37	54	20	89	86	82	133	164	149	64	55	46	130	101	116	132	125	161	111	24	160	109	106	87	150	138	135	112	127	108
gene:Zm00001d001802	27	31	35	25	36	26	5	7	7	13	15	15	23	22	36	7	12	7	23	22	27	37	24	33	16	5	8	13	26	26	25	35	30	20	25	16
gene:Zm00001d001803	45	30	35	15	53	43	14	12	12	50	33	49	40	32	32	12	20	12	17	14	12	33	37	44	19	7	50	13	18	19	42	51	55	21	21	12
gene:Zm00001d001804	55	46	52	16	29	32	23	32	23	40	41	39	28	25	21	22	30	33	116	114	142	55	59	58	98	25	130	137	135	147	72	63	96	106	94	105
gene:Zm00001d001806	552	555	612	850	2063	1832	917	1457	829	930	933	959	1713	2125	1764	1274	1386	1287	2190	2165	2400	2769	2695	2938	2686	616	3700	2506	2618	2643	2975	2768	3400	2322	2047	2560
gene:Zm00001d001807	94	107	101	62	145	147	87	92	62	163	167	140	118	160	164	119	125	102	170	174	179	179	132	171	236	50	328	185	161	182	170	139	200	197	155	156
gene:Zm00001d001808	224	187	192	83	186	176	55	79	53	168	165	171	169	215	200	115	96	98	197	200	184	184	151	191	124	32	173	186	168	186	219	202	205	97	80	81
gene:Zm00001d001809	1196	1136	1224	777	1976	1664	1080	1607	966	1308	1260	1378	1689	2098	1752	1530	1708	1485	1083	1057	1137	1337	1267	1342	1995	478	2546	980	973	1053	1186	1135	1395	1527	1459	2016
gene:Zm00001d001811	75	77	66	18	50	46	13	28	15	31	25	29	41	53	45	46	37	25	96	64	91	31	41	30	55	16	90	43	22	11	35	33	48	46	34	43
gene:Zm00001d001812	510	476	506	256	562	481	242	330	188	429	454	410	490	591	572	320	335	294	232	263	237	415	350	380	273	81	234	224	234	214	426	476	466	302	260	248
gene:Zm00001d001813	172	138	178	60	145	129	132	158	112	140	149	148	143	157	144	202	206	213	197	213	261	187	148	182	233	64	259	201	211	196	183	207	225	204	183	181
gene:Zm00001d001814	750	710	777	319	812	714	397	574	369	830	724	818	788	931	848	668	667	606	674	643	647	824	710	832	696	199	1192	680	730	745	811	801	915	665	640	736
gene:Zm00001d001817	0	0	0	0	1	1	0	0	0	0	0	0	0	0	1	0	0	0	0	0	0	0	0	0	0	0	0	1	0	0	0	1	0	0	0	0
gene:Zm00001d001818	0	0	0	0	0	1	1	0	0	0	2	0	0	1	0	0	1	1	1	1	0	3	1	1	1	0	1	0	1	3	2	4	3	2	4	3
gene:Zm00001d001819	7	3	3	1	14	10	8	6	3	11	6	11	8	12	4	10	7	12	6	10	4	18	21	18	11	3	13	5	11	8	17	16	17	6	7	11
gene:Zm00001d001820	810	765	876	32	53	51	52	70	38	719	779	751	20	30	29	71	57	54	134	138	139	20	15	26	116	34	84	153	198	171	47	42	44	121	114	119
gene:Zm00001d001823	0	0	0	0	0	0	0	0	0	0	0	0	0	0	0	0	0	0	0	0	0	0	0	0	0	0	0	0	0	0	6	0	0	0	0	0
gene:Zm00001d001824	110	130	104	51	107	108	28	29	15	92	80	85	113	153	129	33	36	28	126	136	141	191	186	211	52	16	43	97	91	67	200	216	224	53	42	47
gene:Zm00001d001825	53	44	61	17	39	31	10	14	8	34	43	61	43	39	47	19	22	20	13	19	23	27	26	22	33	8	16	15	29	21	42	31	61	34	20	12
gene:Zm00001d001826	89	66	75	261	530	531	260	341	183	299	298	311	484	566	520	333	339	297	25	28	26	144	120	148	78	27	76	29	35	44	166	179	170	101	64	82
gene:Zm00001d001827	253	249	250	206	544	468	216	322	189	1009	1040	1072	511	645	602	290	344	320	251	214	234	242	227	261	188	60	285	259	252	321	241	264	292	255	221	232
gene:Zm00001d001828	95	72	86	38	123	77	36	53	21	109	72	95	93	104	105	77	87	53	98	88	102	45	77	97	90	9	126	88	118	109	131	135	130	158	130	159
gene:Zm00001d001829	2	1	0	0	0	2	0	2	1	2	1	2	0	0	3	0	0	0	0	0	1	1	0	0	1	0	0	1	2	4	1	2	3	6	2	2
gene:Zm00001d001830	168	143	142	60	143	168	95	156	108	155	149	141	170	205	177	140	154	157	159	129	140	178	171	196	264	62	429	125	124	125	172	182	183	192	139	160
gene:Zm00001d001831	89	115	122	31	94	70	50	47	32	120	110	92	81	83	82	98	112	86	102	91	96	121	139	134	139	27	168	96	122	98	175	185	215	169	153	134
gene:Zm00001d001832	1	1	1	0	0	0	1	1	0	3	0	1	1	1	1	1	2	0	16	8	3	5	5	8	1	1	7	9	4	2	11	17	17	15	14	13
gene:Zm00001d001833	2	0	0	1	1	0	0	1	0	1	0	1	2	4	3	2	1	0	0	0	0	0	0	1	0	0	0	0	0	0	1	0	0	0	1	1
gene:Zm00001d001834	78	102	79	43	109	73	41	71	29	72	61	102	98	92	87	77	94	84	144	143	159	222	212	228	289	69	379	152	140	140	290	250	296	312	237	362
gene:Zm00001d001835	0	0	0	0	0	0	0	0	0	0	1	0	0	0	0	0	0	0	0	0	0	0	0	0	0	0	0	0	0	0	0	0	0	0	0	0
gene:Zm00001d001836	0	0	0	0	0	0	0	0	0	0	0	0	0	0	0	0	0	0	0	0	0	0	0	0	0	0	0	0	0	0	0	0	0	0	0	0
gene:Zm00001d001837	514	491	549	156	360	351	78	124	82	621	624	602	339	372	340	92	112	105	643	653	722	491	418	470	187	54	252	795	907	809	446	463	537	221	173	172
gene:Zm00001d001838	62	54	66	33	96	96	47	92	55	75	68	64	91	89	74	80	97	88	50	53	82	105	98	87	188	43	245	76	77	80	94	84	105	128	100	155
gene:Zm00001d001839	2	1	0	0	1	1	0	0	0	0	0	2	0	0	0	0	0	0	5	1	8	4	3	6	1	0	1	2	1	1	2	3	0	0	1	0
gene:Zm00001d001840	0	0	0	0	0	0	0	0	0	0	0	0	0	0	0	0	0	0	0	0	0	0	0	0	0	0	0	0	0	0	0	0	0	0	0	0
gene:Zm00001d001841	3	0	0	0	0	0	0	0	0	4	1	1	0	2	0	0	0	0	163	129	149	96	73	103	192	71	321	140	114	109	98	100	96	187	182	202
gene:Zm00001d001842	1	0	0	5	23	20	1	0	1	3	2	1	12	26	15	0	2	1	0	1	1	15	24	17	3	0	1	1	1	4	25	24	25	3	0	2
gene:Zm00001d001843	1535	1583	1609	219	471	426	306	464	249	734	766	809	351	388	439	522	499	434	1701	1651	1832	493	505	536	806	152	984	1342	880	903	584	544	572	581	555	535
gene:Zm00001d001844	25	33	26	32	84	80	19	26	13	21	30	28	84	88	103	30	25	30	26	25	35	96	94	113	87	15	110	24	33	37	111	105	119	63	60	75
gene:Zm00001d001845	4	4	4	5	15	14	4	4	2	10	6	2	15	21	23	5	4	4	2	3	2	14	13	15	7	0	8	4	9	8	24	16	17	4	3	6
gene:Zm00001d001846	162	156	188	120	289	263	155	165	98	215	196	155	259	308	266	198	227	190	209	176	180	439	402	459	287	78	401	229	299	262	439	455	544	345	323	328
gene:Zm00001d001847	576	587	571	643	1490	1294	654	952	599	699	660	735	1201	1433	1283	930	931	884	1079	1014	1155	1781	1637	1853	1618	402	2309	1150	1046	994	1926	1735	2003	1601	1446	1574
gene:Zm00001d001848	2360	2357	2311	2375	4721	4661	2312	3956	2212	3471	3235	3439	3833	5083	4645	3475	3754	3617	1253	1156	1247	2902	2821	2790	2016	484	2341	1490	1903	1558	3502	3129	3547	2428	1922	2504
gene:Zm00001d001849	104	90	104	32	101	84	31	40	20	77	86	73	74	72	64	66	63	65	99	94	136	148	123	134	109	27	106	115	79	86	161	180	183	94	86	88
gene:Zm00001d001850	778	771	894	40	72	89	336	575	288	450	488	428	43	59	49	492	533	491	513	479	521	58	63	79	69	26	56	457	469	338	83	80	65	413	391	365
gene:Zm00001d001851	0	0	0	0	0	0	0	0	0	0	0	0	0	0	0	0	0	0	0	0	0	0	0	0	0	0	0	0	0	0	0	0	0	0	0	0
gene:Zm00001d001852	79	72	93	1	2	3	0	1	0	13	20	18	10	5	13	2	2	0	0	1	1	0	1	0	1	0	0	0	1	0	0	1	0	0	0	0
gene:Zm00001d001855	79	78	71	44	124	125	49	72	46	128	122	139	105	144	114	98	62	78	72	79	74	275	230	281	108	30	136	119	168	133	235	270	304	92	96	76
gene:Zm00001d001856	481	457	499	238	603	462	226	290	195	599	579	594	475	522	501	362	407	316	795	763	796	860	801	854	960	212	1003	794	877	856	782	778	893	736	659	816
gene:Zm00001d001857	5894	5707	6425	62	158	144	598	936	574	4099	4399	3974	161	184	178	969	974	887	2950	2808	3178	365	337	438	532	160	457	2814	3129	2828	296	307	358	541	491	487
gene:Zm00001d001858	27	33	29	7	12	9	18	23	13	17	22	21	16	23	22	32	19	24	43	39	52	60	51	59	26	5	34	60	59	71	71	67	79	38	24	35
gene:Zm00001d001859	854	844	902	268	680	646	551	897	511	727	804	770	670	767	701	1127	1085	963	566	504	597	654	634	628	471	95	571	560	487	495	692	639	739	651	674	822
gene:Zm00001d001860	1347	1357	1364	1466	3728	3462	1634	2436	1400	1474	1376	1413	3079	3536	3316	3048	2989	2635	509	481	516	2265	2080	2330	1455	296	2164	618	661	629	2501	2537	2768	1273	1155	1267
gene:Zm00001d001861	116	149	117	230	651	604	232	405	209	197	156	188	503	638	541	386	367	338	198	180	203	529	544	547	501	107	632	209	282	254	530	518	607	452	369	415
gene:Zm00001d001862	23	25	35	8	8	10	4	5	3	12	20	14	22	19	32	30	22	15	68	67	98	42	29	39	13	4	27	75	52	44	65	82	95	25	23	13
gene:Zm00001d001864	6	6	7	9	31	22	1	4	4	11	16	11	24	28	30	10	3	13	110	106	107	245	254	232	83	10	91	128	184	156	239	242	299	124	103	113
gene:Zm00001d001865	22	19	24	6	26	8	18	14	9	126	97	110	16	17	13	71	64	64	9	8	7	12	13	9	24	9	43	23	43	38	11	15	14	31	21	15
gene:Zm00001d001866	134	116	112	55	135	107	141	167	89	49	44	32	124	145	127	165	169	207	101	103	122	110	95	102	263	79	377	79	78	75	194	150	168	223	226	242
gene:Zm00001d001868	698	665	659	288	823	716	455	628	473	561	486	501	660	809	744	813	805	761	530	519	555	829	716	815	848	200	1107	550	536	543	846	817	913	883	799	843
gene:Zm00001d001869	45	43	39	20	53	37	12	33	19	59	64	77	42	41	50	29	24	17	79	74	81	109	102	104	67	14	77	87	143	111	122	110	129	47	50	59
gene:Zm00001d001870	285	249	244	195	471	429	194	266	184	294	294	310	429	433	444	325	321	305	301	307	327	485	444	487	334	75	546	331	422	381	551	549	561	327	326	344
gene:Zm00001d001871	15	18	14	8	28	32	23	29	25	16	8	11	23	42	29	41	58	29	18	16	19	30	35	32	32	6	67	26	12	18	29	28	32	48	35	34
gene:Zm00001d001872	0	0	0	0	0	0	0	0	0	0	0	0	0	0	0	0	0	0	0	0	0	0	0	0	0	0	0	0	0	0	0	0	0	0	0	0
gene:Zm00001d001873	0	0	0	0	0	0	0	0	0	0	0	0	0	0	0	0	0	0	0	0	0	0	0	0	0	0	0	0	0	0	0	0	0	0	0	0
gene:Zm00001d001875	0	0	0	0	0	0	0	0	0	0	0	0	0	0	0	0	0	0	0	0	0	0	0	0	0	0	0	0	0	0	0	0	0	0	0	0
gene:Zm00001d001876	0	0	0	0	0	0	0	0	0	0	0	0	0	0	0	0	0	0	0	0	0	0	0	0	0	0	0	0	0	0	0	0	0	0	0	0
gene:Zm00001d001877	77	84	85	37	92	76	85	135	85	84	90	76	74	72	86	220	231	212	135	119	118	86	84	117	200	51	169	121	152	139	112	128	124	198	164	151
gene:Zm00001d001879	352	362	381	89	215	168	165	228	143	165	136	150	151	186	195	239	244	246	152	142	158	167	185	176	348	92	359	123	106	115	163	176	199	280	231	357
gene:Zm00001d001880	88	100	118	59	109	153	38	61	34	137	145	130	126	147	129	78	72	77	84	89	107	161	140	155	79	26	110	97	102	97	109	140	171	94	61	75
gene:Zm00001d001881	1790	1684	1856	1177	2953	2769	1231	1918	1103	1300	1257	1232	1966	2362	2230	1650	1566	1439	1939	1904	2008	2881	2544	2814	1736	431	2160	1597	1285	1164	2395	2380	2578	1822	1706	1584
gene:Zm00001d001882	174	171	187	170	385	362	265	401	273	221	205	223	355	399	358	390	418	368	186	173	216	454	430	470	657	158	868	237	283	250	392	389	450	457	418	454
gene:Zm00001d001883	4306	4221	4529	1472	3793	3413	250	343	216	7321	7322	7413	3160	3934	3325	312	313	309	5618	5545	5870	4232	3785	4177	835	236	878	8005	10839	10582	4841	4654	5460	674	567	716
gene:Zm00001d001884	475	542	559	435	1123	955	472	613	391	513	492	542	1007	1221	1067	540	571	528	498	515	510	1017	985	968	880	197	1184	450	528	538	1107	1002	1192	744	674	690
gene:Zm00001d001885	3	1	2	2	1	0	0	0	0	0	2	0	1	3	2	2	0	2	0	0	0	0	0	0	0	0	0	0	0	0	0	0	0	0	0	0
gene:Zm00001d001887	0	0	0	0	0	1	0	1	0	0	0	0	0	0	0	0	0	0	0	0	0	0	0	0	0	0	0	0	0	0	0	0	0	0	0	0
gene:Zm00001d001894	0	0	0	0	0	0	0	0	0	0	0	0	0	0	0	0	0	0	0	0	0	0	0	0	0	0	0	0	0	0	0	0	0	0	0	0
gene:Zm00001d001895	639	662	665	369	871	806	283	396	247	747	765	753	732	880	780	481	489	452	621	538	572	761	735	794	491	106	609	599	661	683	780	808	806	507	440	454
gene:Zm00001d001896	85	66	65	367	923	926	64	78	34	480	494	466	902	1031	976	130	154	154	189	178	231	858	798	892	195	38	276	317	485	454	788	875	930	290	272	233
gene:Zm00001d001897	50	38	36	19	71	53	14	29	18	54	46	49	62	73	53	26	28	30	62	49	68	88	78	95	33	10	68	67	87	101	91	90	113	40	26	46
gene:Zm00001d001898	436	459	448	406	979	912	361	569	318	717	622	733	1008	1140	1033	695	540	654	488	499	520	990	938	1035	698	145	912	641	815	828	1246	1128	1264	793	762	816
gene:Zm00001d001899	24	21	22	9	33	36	6	13	9	16	13	21	16	19	27	9	14	22	52	60	63	75	63	78	67	12	53	53	36	34	84	87	114	49	48	38
gene:Zm00001d001900	12	9	16	20	22	31	10	13	5	22	17	22	29	32	36	16	16	24	20	16	17	16	20	21	11	5	19	22	27	20	33	36	40	30	30	19
gene:Zm00001d001901	120	136	131	86	187	186	93	129	81	179	175	177	160	166	176	111	113	113	94	82	82	142	111	122	125	21	175	92	112	112	124	109	140	89	84	84
gene:Zm00001d001902	16	18	16	8	20	19	16	17	13	15	15	17	19	26	14	25	23	15	36	31	47	121	110	101	132	29	162	56	46	58	114	124	124	83	87	100
gene:Zm00001d001903	518	510	475	320	781	717	336	540	311	523	517	525	578	707	633	523	520	507	303	293	303	488	433	455	508	161	625	266	334	313	424	404	467	404	320	413
gene:Zm00001d001904	3	2	1	1	2	2	2	3	2	5	6	6	1	2	1	4	1	5	0	0	0	0	0	0	0	0	0	0	0	0	0	0	0	0	0	0
gene:Zm00001d001905	22	23	27	18	30	24	39	61	33	30	20	33	26	42	33	52	69	46	13	13	15	12	7	26	98	35	124	12	5	4	14	10	29	109	115	128
gene:Zm00001d001906	5	4	6	1	3	0	1	3	0	5	7	7	2	3	2	4	1	2	1	1	0	1	0	2	0	0	0	1	0	0	0	0	0	1	0	0
gene:Zm00001d001907	41	39	43	1	0	6	9	13	10	63	76	72	4	2	1	13	12	11	42	25	64	1	4	7	18	4	12	45	37	38	8	10	8	17	19	10
gene:Zm00001d001908	2537	2436	2527	1048	2665	2410	1994	2979	1765	2523	2497	2447	2188	2586	2345	3375	3302	2992	2057	1981	2088	1612	1566	1588	2206	522	2989	1638	1338	1308	1699	1556	1771	2094	1890	2000
gene:Zm00001d001909	872	791	864	480	1191	1077	606	831	560	792	723	785	903	988	990	811	791	719	315	311	367	911	846	840	228	51	284	370	418	449	796	703	815	407	408	430
gene:Zm00001d001910	60	64	61	40	100	101	80	105	71	54	39	67	81	127	95	96	121	127	13	4	19	12	32	8	4	0	78	8	33	3	15	23	18	78	17	20
gene:Zm00001d001911	0	0	0	0	0	0	0	0	0	0	0	0	0	0	0	0	0	0	0	0	0	0	0	0	0	0	0	0	0	0	0	0	0	0	0	0
gene:Zm00001d001912	0	0	0	0	0	0	0	0	0	0	0	0	0	0	0	0	0	0	33	41	31	49	47	55	79	29	91	46	21	22	49	56	65	49	27	58
gene:Zm00001d001913	9336	8925	9667	3465	8649	8016	4792	6677	4417	8242	7756	7865	6668	7624	7306	7103	6831	6432	9407	8744	9336	9048	8018	8913	10221	2437	14499	8648	8154	8222	7976	8036	8595	9184	8137	7939
gene:Zm00001d001914	817	769	813	724	1877	1570	569	862	539	1410	1349	1395	1553	2104	1605	802	834	756	1352	1401	1461	2781	2617	2779	2441	621	3262	1684	1937	1970	2683	2449	2956	2047	1717	2237
gene:Zm00001d001915	358	338	336	374	841	858	323	456	272	384	379	392	829	946	953	731	748	682	252	272	293	906	854	953	362	107	362	258	354	343	773	748	843	402	359	393
gene:Zm00001d001916	5	1	3	0	2	0	0	0	1	0	0	1	1	1	0	0	0	0	3	0	0	2	0	0	1	0	0	2	1	0	0	0	3	3	0	0
gene:Zm00001d001917	76	66	81	29	94	80	60	80	50	73	75	76	76	90	87	73	91	83	25	18	20	12	8	18	16	1	17	22	26	21	25	9	19	8	20	9
gene:Zm00001d001918	0	0	0	0	0	0	0	0	0	0	0	0	0	0	0	0	0	0	0	0	0	0	0	0	0	0	0	0	0	0	0	0	0	0	0	0
gene:Zm00001d001920	0	0	0	0	0	0	0	0	0	0	0	0	0	0	0	0	0	0	0	0	0	0	0	0	0	0	0	0	0	0	0	0	0	0	0	0
gene:Zm00001d001921	0	0	0	0	0	0	0	0	0	0	0	0	0	0	0	0	0	0	0	0	0	0	0	0	0	0	0	0	0	0	0	0	0	0	0	0
gene:Zm00001d001922	0	0	0	0	0	0	0	0	0	0	0	0	0	0	0	0	0	0	0	0	0	0	0	0	0	0	0	0	0	0	0	0	0	0	0	0
gene:Zm00001d001923	106	97	88	47	110	102	45	64	29	81	70	90	95	120	97	84	82	68	81	77	94	93	75	85	86	22	114	69	90	88	108	98	99	72	62	78
gene:Zm00001d001924	325	355	335	59	157	145	24	38	18	97	99	117	123	133	154	73	52	69	31	29	22	100	92	91	57	10	55	32	40	28	80	109	129	43	44	52
gene:Zm00001d001926	0	0	0	0	0	0	0	0	0	0	0	0	0	0	0	0	0	0	0	0	0	0	0	0	0	0	0	0	0	0	0	0	0	0	0	0
gene:Zm00001d001927	6	3	4	0	3	0	1	0	0	4	5	8	0	1	4	0	0	0	0	2	1	0	3	0	0	0	0	1	0	0	0	0	1	0	1	1
gene:Zm00001d001928	119	123	130	37	91	104	12	33	21	245	184	230	143	156	141	49	54	53	211	198	221	388	382	353	358	68	507	272	397	357	414	390	489	474	439	628
gene:Zm00001d001929	637	592	664	320	742	642	443	705	450	448	413	405	545	717	606	621	790	660	434	401	407	619	608	610	615	142	717	373	451	471	553	615	615	509	505	537
gene:Zm00001d001930	0	0	0	0	0	0	0	0	0	0	0	0	0	0	0	0	0	0	0	0	0	0	0	0	0	0	0	0	0	0	0	0	0	0	0	0
gene:Zm00001d001931	0	0	0	0	0	0	1	0	0	0	0	0	0	0	0	0	0	0	0	0	0	0	0	0	0	0	0	1	0	0	0	0	0	0	0	0
gene:Zm00001d001932	2157	2140	2275	1016	2611	2419	1456	2116	1273	2281	2272	2307	2151	2556	2366	2480	2364	2272	2857	2696	3002	3319	3270	3483	2374	544	3096	3185	3100	3281	3270	3152	3608	2607	2360	2400
gene:Zm00001d001933	298	283	268	196	460	382	212	274	212	426	416	399	483	571	464	374	406	353	290	256	275	341	298	340	355	89	404	314	425	400	373	373	411	345	315	308
gene:Zm00001d001934	0	0	0	0	0	0	0	0	0	0	0	0	0	0	0	0	0	0	0	0	0	0	0	0	0	0	0	0	0	0	0	0	0	0	0	0
gene:Zm00001d001935	219	218	208	131	344	290	114	144	67	193	197	215	296	319	315	145	151	134	291	316	362	301	300	306	277	61	350	263	277	273	415	355	421	190	187	192
gene:Zm00001d001936	108	96	115	63	156	125	84	126	72	64	57	92	112	146	115	100	107	114	86	94	95	175	167	172	213	63	208	111	124	130	179	122	191	169	147	210
gene:Zm00001d001937	504	511	506	243	709	628	377	548	341	405	390	421	605	697	640	477	596	540	449	482	530	681	633	656	687	141	896	438	379	446	619	657	754	632	571	619
gene:Zm00001d001939	36	37	28	20	58	65	17	36	21	36	29	34	41	57	54	23	45	28	16	3	11	23	36	40	15	6	26	9	14	10	34	23	35	26	15	18
gene:Zm00001d001940	213	224	237	83	224	186	104	188	117	165	197	165	177	228	180	182	169	161	168	174	183	253	207	223	265	78	381	178	171	153	211	206	207	232	212	196
gene:Zm00001d001941	282	284	300	84	195	169	88	121	101	180	200	194	173	189	191	161	137	129	42	31	26	97	84	85	89	31	104	31	39	55	81	114	113	100	81	96
gene:Zm00001d001942	0	0	0	0	0	0	0	0	0	0	0	0	0	0	0	0	0	0	0	0	0	0	0	0	0	0	0	0	0	0	0	0	0	0	0	0
gene:Zm00001d001943	10	5	3	3	4	9	8	3	6	16	13	12	11	9	15	313	379	334	60	36	55	13	19	16	17	3	17	56	74	61	8	5	12	8	16	4
gene:Zm00001d001944	0	0	0	0	0	0	0	0	0	0	0	0	0	0	0	0	0	0	0	0	0	0	0	0	0	0	0	0	0	0	1	0	0	0	0	0
gene:Zm00001d001945	0	0	0	1	2	6	0	0	0	3	1	4	2	7	4	1	4	3	1	1	1	4	6	3	2	0	1	0	0	1	3	3	4	4	2	1
gene:Zm00001d001946	188	171	190	129	330	291	118	171	103	219	245	206	293	347	346	197	169	124	142	109	158	300	260	276	243	62	257	160	161	163	275	284	285	180	173	144
gene:Zm00001d001947	1323	1322	1415	389	888	841	294	461	282	1078	1033	1107	739	878	785	377	349	345	1056	1044	1058	907	767	894	676	141	864	1131	1199	1195	849	750	915	681	648	695
gene:Zm00001d001948	0	0	0	0	0	0	0	0	0	0	0	0	0	0	0	1	0	0	0	0	0	0	0	0	0	0	0	0	0	0	0	0	0	0	0	0
gene:Zm00001d001949	57	50	58	30	79	77	37	56	42	55	58	66	54	76	63	68	68	63	49	57	55	82	71	83	96	15	120	51	47	55	70	69	78	98	70	105
gene:Zm00001d001951	304	319	320	116	305	304	151	199	106	275	263	251	229	258	210	186	199	179	217	220	267	308	300	371	422	96	531	214	212	214	285	282	294	309	291	203
gene:Zm00001d001952	327	358	334	240	516	461	446	672	395	428	450	408	499	587	539	689	789	726	447	461	478	524	543	548	644	174	887	555	686	666	589	527	589	673	553	668
gene:Zm00001d001953	47	39	42	53	124	116	36	72	47	79	55	48	288	311	330	97	80	90	54	53	44	198	173	217	96	23	137	57	73	89	264	234	271	99	90	89
gene:Zm00001d001957	0	3	1	0	1	2	3	8	1	1	0	0	1	2	2	3	3	5	1	0	1	0	0	0	0	0	0	0	1	0	2	0	0	0	1	1
gene:Zm00001d001959	1499	1461	1508	614	1413	1235	1753	2601	1631	1229	1127	1166	945	1158	1051	2029	1962	1897	816	669	726	1164	1190	1266	2394	580	3225	688	567	540	1041	1056	1130	1778	1608	1510
gene:Zm00001d001960	144	147	158	8	17	8	34	45	16	142	142	146	23	30	24	42	41	38	11	11	8	24	24	20	0	0	3	12	13	19	22	28	26	35	37	33
gene:Zm00001d001961	0	0	0	0	0	0	0	0	0	0	0	1	2	0	0	1	0	0	0	0	0	0	0	0	0	0	0	0	0	0	0	0	0	0	0	1
gene:Zm00001d001962	2169	2145	2146	1366	3160	2966	1880	2797	1673	2578	2497	2701	2683	2919	2876	3047	2975	2769	2059	1890	2014	2966	2909	3082	2846	650	3995	2228	2588	2569	2865	2934	3245	3183	3003	3501
gene:Zm00001d001963	0	0	0	0	0	0	0	0	0	0	0	0	0	0	0	0	0	0	0	0	0	0	0	0	0	0	0	0	0	0	0	0	0	1	0	0
gene:Zm00001d001964	2	1	1	0	0	1	2	0	0	0	0	1	0	0	3	1	0	1	1	1	0	1	1	0	0	1	0	1	0	0	4	1	1	1	2	0
gene:Zm00001d001965	0	0	0	0	0	0	0	0	0	0	0	0	0	0	0	0	0	0	0	0	0	0	0	0	0	0	0	0	0	0	0	0	0	0	0	0
gene:Zm00001d001966	683	749	706	423	1058	1019	490	624	387	720	735	772	1007	1171	1024	795	857	797	629	571	639	999	909	1094	731	169	1018	668	789	753	1202	1145	1261	784	735	822
gene:Zm00001d001967	413	365	424	280	675	602	339	509	299	410	459	447	474	646	609	507	530	487	452	423	418	648	588	680	655	153	1001	500	535	573	595	601	662	651	643	600
gene:Zm00001d001968	754	776	747	522	1308	1134	640	953	603	856	816	941	1086	1338	1128	856	981	840	917	892	965	1205	1259	1274	1016	222	1443	900	1085	1006	1292	1154	1363	1100	927	1401
gene:Zm00001d001970	5	2	2	1	6	5	1	8	4	5	2	2	4	7	2	3	5	7	7	3	5	6	6	5	3	4	7	5	7	5	5	1	9	6	5	7
gene:Zm00001d001971	0	0	0	0	0	0	1	0	0	0	0	1	0	0	0	0	0	0	0	0	0	1	0	0	0	0	1	0	0	0	0	1	0	0	0	0
gene:Zm00001d001972	70	51	68	21	54	52	42	47	33	59	54	60	47	54	49	47	49	34	49	53	50	63	73	84	63	12	70	51	76	50	51	73	86	48	50	56
gene:Zm00001d001973	82	62	73	27	129	77	39	61	34	85	74	92	93	98	104	54	56	62	76	58	72	109	103	125	167	36	228	97	96	87	113	95	142	82	72	101
gene:Zm00001d001974	60	53	42	58	143	140	8	28	9	74	63	61	126	144	141	23	32	31	53	52	44	177	163	193	64	11	72	51	58	66	177	186	205	40	43	43
gene:Zm00001d001975	0	0	0	0	0	0	0	0	0	0	0	0	0	0	0	0	0	1	0	0	0	0	0	0	0	0	0	0	0	0	0	0	0	0	0	0
gene:Zm00001d001976	0	0	0	0	0	0	0	1	1	0	0	0	1	0	0	1	0	0	0	0	0	3	0	2	0	0	0	0	0	1	1	0	0	1	0	0
gene:Zm00001d001977	0	0	0	0	0	0	0	0	0	0	0	0	0	0	0	0	0	0	0	0	0	0	1	0	0	0	1	0	0	0	0	0	0	0	0	0
gene:Zm00001d001978	11979	11948	11956	1026	2499	2348	901	1555	905	2949	2638	3000	2304	2534	2430	1651	1705	1573	5460	5393	5931	2458	2431	2463	1316	288	1820	4114	2856	2796	2758	2539	2745	1861	1725	2105
gene:Zm00001d001979	1961	1944	1964	304	769	671	457	610	326	907	875	900	663	819	710	999	953	907	635	638	642	824	739	864	830	169	945	687	673	667	949	902	1027	814	807	741
gene:Zm00001d001980	205	214	200	96	231	200	168	195	111	180	169	193	222	264	229	256	258	238	205	164	161	175	204	206	240	58	390	211	195	194	240	230	280	236	222	236
gene:Zm00001d001982	110	89	106	19	42	51	37	46	35	48	46	43	40	43	59	48	43	43	39	38	49	39	23	32	44	10	34	27	21	20	31	36	36	30	48	42
gene:Zm00001d001983	500	552	548	403	976	892	403	585	376	663	661	654	967	983	947	685	709	656	504	459	544	794	770	877	539	136	717	589	743	763	893	855	1067	713	672	730
gene:Zm00001d001984	11	4	8	130	379	354	372	569	372	34	39	42	458	538	511	924	968	776	9	5	15	320	253	308	482	143	493	16	21	23	435	386	492	482	418	580
gene:Zm00001d001986	1	1	0	0	0	1	0	0	1	1	0	0	0	0	0	0	0	0	1	1	0	0	1	0	0	0	0	2	0	0	1	0	1	0	1	0
gene:Zm00001d001987	119	96	119	35	85	82	26	27	26	153	154	180	88	132	98	41	36	25	112	106	146	89	100	118	66	17	77	157	171	175	109	91	149	42	40	57
gene:Zm00001d001988	623	623	647	598	1549	1402	598	863	511	857	818	811	1261	1441	1381	1039	1028	970	562	503	587	1446	1352	1547	1137	265	1531	716	926	986	1564	1434	1678	1012	945	988
gene:Zm00001d001989	34	50	31	15	36	40	3	5	4	47	45	60	34	51	42	0	6	0	34	34	40	24	22	25	8	2	13	41	26	34	42	63	45	3	6	0
gene:Zm00001d001990	0	0	1	2	4	0	0	0	3	1	0	0	2	3	4	0	0	1	0	1	2	5	3	4	5	0	4	1	0	1	2	4	3	5	2	2
gene:Zm00001d001993	11	10	19	35	145	109	3	2	2	244	225	249	205	236	230	7	6	5	19	11	16	222	187	249	30	12	32	252	555	554	212	232	274	21	19	27
gene:Zm00001d001994	145	166	152	60	149	135	144	212	121	129	142	151	126	113	134	217	195	201	148	155	166	130	105	110	168	45	208	153	137	126	117	124	116	227	156	179
gene:Zm00001d001995	2211	2207	2266	1362	3416	3126	1919	2822	1709	2241	2061	2185	2963	3346	3249	3124	2967	3054	1709	1551	1704	3327	3114	3517	2951	644	4656	1947	2243	2099	3816	3547	3950	3017	2758	3219
gene:Zm00001d001996	8	10	5	5	11	9	10	10	5	2	2	4	9	11	2	4	13	13	16	12	8	14	12	13	29	8	24	5	4	10	12	13	10	26	14	27
gene:Zm00001d001997	55	50	48	15	53	48	32	70	32	45	40	46	62	48	43	48	46	40	68	69	49	72	72	65	72	13	74	64	68	62	63	65	75	60	60	69
gene:Zm00001d001999	1601	1595	1558	1190	2876	2677	2098	3147	1937	1838	1700	1861	2324	2816	2391	3973	4030	3743	1531	1417	1569	2954	2723	2973	2956	645	4127	1657	1641	1691	2586	2409	2785	3391	3227	3502
gene:Zm00001d002000	11266	10501	11727	2555	5447	5128	2680	4084	2500	7617	7902	7836	3606	4032	3984	2232	2331	2100	7891	7636	8208	5276	4541	5081	1798	505	1781	6751	6835	6210	4024	3898	4409	2488	2188	2374
gene:Zm00001d002001	522	460	563	345	755	680	402	594	385	538	559	577	539	678	674	654	625	593	675	626	681	620	546	594	877	212	952	580	587	554	651	591	646	616	506	485
gene:Zm00001d002003	676	646	708	313	661	668	426	699	369	627	561	610	601	738	655	604	627	565	690	585	614	598	557	607	517	142	703	561	578	507	656	625	702	596	552	545
gene:Zm00001d002004	1	1	2	0	1	2	0	0	0	1	0	1	2	1	4	0	1	1	1	0	1	0	0	0	1	0	0	0	1	0	1	1	1	1	0	2
gene:Zm00001d002005	0	0	0	0	1	1	0	1	0	0	0	0	0	1	0	2	0	0	0	0	0	1	0	0	0	0	0	1	0	0	0	0	0	0	0	0
gene:Zm00001d002006	13571	13485	14341	8854	22488	19623	14790	22380	12870	12781	12387	12408	16465	18819	18237	22376	22963	20621	12618	11943	12906	19782	18947	19677	19307	4698	19813	10922	10775	9094	21477	20682	22509	21752	19598	20846
gene:Zm00001d002007	2	0	1	1	1	1	4	5	1	0	0	2	0	1	0	4	0	1	0	1	0	0	0	0	1	0	0	0	1	0	0	0	0	1	0	0
gene:Zm00001d002008	0	0	0	0	0	0	0	0	0	0	0	0	0	0	0	0	0	0	0	0	0	0	0	0	0	0	0	0	0	0	0	0	0	0	0	0
gene:Zm00001d002011	1	0	0	0	0	1	2	0	0	1	1	0	2	0	0	1	0	1	5	3	5	0	0	1	2	0	0	3	4	2	0	2	2	1	0	0
gene:Zm00001d002012	629	581	577	301	785	707	725	1121	665	582	546	572	548	641	587	1143	1181	1070	759	708	773	679	680	738	1167	268	1589	683	602	617	632	620	687	1080	984	1123
gene:Zm00001d002013	1	2	1	5	4	1	1	2	1	3	1	2	1	0	1	3	2	2	1	0	3	0	1	2	1	0	4	1	2	1	2	2	3	4	2	2
gene:Zm00001d002014	0	0	0	1	4	7	3	2	3	0	0	1	4	7	4	5	3	3	1	0	0	6	6	5	4	0	2	0	0	0	6	10	10	7	7	3
gene:Zm00001d002015	0	0	0	0	0	0	0	0	0	0	0	0	0	0	0	0	0	0	0	0	0	0	0	0	0	0	0	0	0	0	0	0	0	0	0	0
gene:Zm00001d002016	0	0	0	1	1	0	0	0	2	0	0	1	2	1	0	2	1	1	0	1	0	2	1	0	1	0	2	0	0	0	1	1	3	0	3	1
gene:Zm00001d002017	0	0	0	0	0	0	0	0	0	0	0	0	0	0	0	0	0	0	0	0	0	0	0	0	0	0	0	0	0	0	0	0	0	0	0	0
gene:Zm00001d002018	10	4	2	11	18	17	16	26	13	12	5	6	15	17	18	44	41	48	4	7	6	23	13	19	28	9	45	3	4	13	29	24	29	21	40	17
gene:Zm00001d002019	37	20	32	2	6	6	7	7	10	8	7	16	6	8	5	8	4	10	22	13	18	15	4	6	12	6	7	10	11	12	13	8	10	12	10	14
gene:Zm00001d002020	22	21	24	148	372	295	64	115	57	67	72	73	245	283	279	203	233	219	38	49	49	339	276	274	132	52	165	72	88	81	323	317	350	152	123	131
gene:Zm00001d002021	15	6	16	7	14	11	1	1	2	40	45	44	22	15	10	5	5	4	16	25	17	47	39	40	7	3	10	32	47	44	23	50	49	17	6	5
gene:Zm00001d002022	608	614	672	217	563	557	76	134	53	1096	1028	1157	564	654	598	144	135	139	670	668	738	573	578	657	190	52	305	961	1031	1092	755	668	764	183	167	183
gene:Zm00001d002023	0	0	0	0	0	0	0	0	0	0	0	0	0	0	0	0	0	0	0	0	0	0	0	0	0	0	0	0	0	0	0	1	0	0	0	0
gene:Zm00001d002024	3190	3140	3203	1894	4508	4265	3151	4599	2620	4450	4292	4524	3971	4383	4372	5218	5033	4792	2994	2703	2873	3885	3774	3936	4460	1003	6496	3370	3922	3794	4031	3943	4401	4561	4329	5793
gene:Zm00001d002025	0	0	0	0	2	0	1	0	0	0	0	0	0	0	0	0	2	0	2	1	2	1	0	0	0	0	0	1	0	0	2	2	3	0	2	3
gene:Zm00001d002026	17	19	11	4	3	1	6	6	3	4	6	8	5	3	3	2	3	0	7	8	4	1	5	3	2	1	4	2	1	2	2	3	4	6	5	4
gene:Zm00001d002027	456	423	495	250	556	559	150	211	110	539	491	507	520	624	604	261	223	263	455	424	465	634	601	642	285	77	441	539	527	555	646	645	774	317	306	279
gene:Zm00001d002028	409	370	426	260	489	478	213	287	212	353	338	368	429	452	473	420	427	354	399	378	403	726	587	754	465	134	620	353	397	379	655	667	709	557	463	471
gene:Zm00001d002029	638	659	757	510	1251	1045	473	683	444	774	701	726	1032	1185	1074	810	833	697	634	652	687	1429	1227	1393	1125	285	1207	700	867	853	1305	1282	1415	1101	940	852
gene:Zm00001d002031	12	19	9	7	15	20	9	7	8	14	17	12	3	13	14	15	12	15	18	16	10	27	21	31	25	8	31	17	29	21	12	13	28	20	28	30
gene:Zm00001d002032	214	213	211	131	478	351	250	409	273	288	214	249	347	482	342	301	383	322	253	211	223	497	521	495	692	174	826	237	274	283	437	430	548	524	444	749
gene:Zm00001d002033	33	30	28	17	45	30	18	26	22	28	24	31	30	34	24	40	31	36	26	23	37	39	43	44	25	7	21	43	50	39	42	22	50	44	38	42
gene:Zm00001d002034	565	585	558	135	358	316	225	325	179	380	344	347	386	418	401	350	385	325	357	397	394	332	305	361	393	92	440	342	351	374	481	424	455	414	356	417
gene:Zm00001d002035	6	5	8	1	6	6	9	25	10	27	17	24	12	8	7	30	29	38	28	21	17	14	16	10	8	0	10	24	21	19	28	34	35	27	22	23
gene:Zm00001d002036	177	157	221	156	303	273	120	183	117	211	185	231	248	321	262	184	203	154	166	139	151	293	286	314	242	72	383	175	196	191	285	281	325	218	215	195
gene:Zm00001d002037	0	0	1	0	1	2	0	0	0	1	0	1	2	1	1	2	0	2	1	1	0	2	3	3	5	1	3	4	6	5	5	6	6	1	2	6
gene:Zm00001d002038	4809	4466	4832	749	1930	1736	5998	8803	5284	1000	1018	999	1847	2075	1950	8393	8780	7790	6221	5702	6132	859	815	894	10077	2306	13514	3539	814	755	1296	1206	1309	9154	8573	9306
gene:Zm00001d002039	15	11	14	17	45	33	11	20	14	25	31	28	61	72	73	28	27	23	5	10	7	79	94	136	44	10	78	16	21	24	83	91	98	38	47	35
gene:Zm00001d002040	0	0	0	0	0	0	0	0	0	0	0	0	0	1	0	0	0	0	0	0	0	0	0	0	0	0	0	0	0	0	0	0	0	0	0	1
gene:Zm00001d002042	0	0	0	0	0	0	0	0	0	0	0	0	0	1	0	0	0	0	0	0	0	0	0	0	0	0	0	0	0	0	0	0	0	0	0	0
gene:Zm00001d002043	4	3	2	2	8	10	3	4	5	0	0	0	3	5	11	5	7	6	2	2	1	11	4	9	6	4	10	0	2	1	3	5	2	11	6	10
gene:Zm00001d002044	0	0	0	0	0	0	0	0	0	0	0	0	0	0	0	0	0	0	0	0	0	0	0	0	0	0	0	0	0	0	0	0	0	0	0	0
gene:Zm00001d002046	20	21	25	16	76	46	23	39	14	26	26	17	47	51	41	23	33	14	21	32	25	78	100	94	67	18	103	17	34	25	64	53	78	48	47	66
gene:Zm00001d002047	0	0	0	0	0	0	0	0	0	0	0	0	0	0	0	0	0	0	0	0	0	0	0	0	0	0	0	0	0	0	0	0	0	0	0	0
gene:Zm00001d002048	0	1	1	0	1	0	0	0	0	0	0	0	0	0	0	0	0	0	0	0	0	0	0	0	0	0	0	0	0	0	0	0	0	0	0	0
gene:Zm00001d002049	0	0	0	0	0	0	0	0	0	0	0	0	0	0	0	0	0	0	0	0	0	0	0	0	0	0	0	0	0	0	0	0	0	0	0	0
gene:Zm00001d002050	0	0	0	0	0	0	0	0	0	0	0	0	0	0	0	0	0	0	3	4	5	2	2	3	3	1	4	3	4	4	1	4	1	1	5	3
gene:Zm00001d002051	47	52	52	43	138	126	8	20	6	52	47	52	126	143	152	29	15	18	66	60	55	143	129	135	40	12	57	41	38	45	181	217	190	97	83	74
gene:Zm00001d002052	219	219	213	44	72	62	38	86	58	88	87	95	51	68	48	49	58	55	229	214	266	18	23	19	157	47	213	130	66	51	49	45	43	78	69	66
gene:Zm00001d002053	201	208	192	100	268	241	128	211	102	164	141	175	229	303	286	163	163	176	299	263	252	286	277	349	349	71	534	195	173	172	323	272	394	271	241	331
gene:Zm00001d002054	136	141	144	78	191	183	44	77	38	122	128	122	193	218	184	92	114	76	146	111	139	148	161	177	111	31	143	141	146	139	245	219	242	124	108	131
gene:Zm00001d002055	0	0	0	0	1	0	1	0	0	0	0	0	1	0	0	3	4	3	0	0	0	0	0	0	1	0	0	1	1	0	0	0	2	0	0	0
gene:Zm00001d002056	2	2	1	1	1	0	1	2	1	3	0	3	0	1	0	2	0	2	2	0	2	1	2	3	5	0	5	3	3	1	1	2	0	1	2	4
gene:Zm00001d002057	0	0	0	0	0	0	0	0	0	0	0	0	0	0	0	0	0	0	0	0	0	0	0	0	0	0	0	0	0	0	0	0	0	0	0	0
gene:Zm00001d002058	164	175	183	92	246	242	117	213	106	83	89	92	204	272	209	146	130	141	186	178	184	229	224	267	261	71	330	158	111	81	206	239	237	206	184	202
gene:Zm00001d002062	0	0	0	0	0	0	0	0	0	0	0	0	0	0	0	0	0	0	0	0	0	0	0	0	0	0	0	0	0	0	0	0	0	0	0	0
gene:Zm00001d002063	212	196	246	205	429	384	157	241	144	195	223	199	377	400	429	251	261	224	138	165	176	350	306	386	162	54	136	147	165	147	322	335	341	249	232	182
gene:Zm00001d002064	39	41	36	10	22	16	11	15	9	9	20	19	26	41	25	42	32	25	37	35	71	36	35	24	48	9	47	30	17	21	71	53	73	51	50	54
gene:Zm00001d002065	5762	5333	5667	4209	9971	9009	767	1048	741	10593	10631	10475	7811	8871	8675	1148	1194	1043	6411	6293	6958	7855	7162	7826	1899	481	2386	8909	11795	11415	7748	7674	8631	1864	1745	1678
gene:Zm00001d002066	62	82	102	34	108	85	19	34	10	92	143	99	67	87	69	27	29	31	54	45	53	74	54	74	32	5	30	68	115	85	96	78	74	37	29	32
gene:Zm00001d002067	1	1	0	0	0	0	0	0	0	0	0	0	0	0	0	0	0	0	1	0	0	0	0	0	0	1	0	0	0	0	0	0	0	0	0	0
gene:Zm00001d002068	5	1	3	3	4	1	0	1	3	6	0	5	3	4	10	0	2	3	13	18	22	9	8	2	1	1	2	10	5	11	3	3	3	2	3	4
gene:Zm00001d002069	57	58	67	70	144	123	24	41	35	81	112	79	113	104	130	46	41	36	64	72	83	236	211	241	140	55	116	123	172	146	220	244	311	157	119	134
gene:Zm00001d002071	218	172	233	266	670	626	148	236	106	489	547	542	459	568	615	288	261	218	331	355	463	1206	928	1083	606	176	350	730	931	879	1077	1200	1243	802	722	707
gene:Zm00001d002072	1	3	1	3	9	3	1	2	2	4	1	4	8	6	2	0	3	2	7	7	3	49	29	39	50	12	74	19	30	28	28	36	35	36	31	13
gene:Zm00001d002074	2	1	1	0	1	2	0	2	0	2	4	2	1	1	0	0	0	0	0	2	1	2	1	2	0	0	0	3	3	3	1	3	1	0	0	0
gene:Zm00001d002075	87	71	111	179	462	368	196	226	144	79	71	77	394	478	431	308	328	287	89	104	105	284	299	299	483	136	453	63	37	61	295	277	358	303	265	365
gene:Zm00001d002079	150	112	132	84	180	130	89	107	75	134	129	130	153	175	194	113	124	96	113	121	144	188	152	180	93	33	88	134	122	119	160	166	182	131	103	95
gene:Zm00001d002080	2484	2558	2518	1471	3652	3231	1899	3002	1858	1502	1433	1552	2969	3376	2951	2791	2833	2629	2248	2150	2227	2760	2678	2801	2463	681	3295	1724	1448	1342	3192	2986	3383	3220	2870	2902
gene:Zm00001d002081	0	0	0	0	0	0	0	0	0	0	0	0	0	0	0	0	0	0	0	0	0	0	0	0	0	0	0	0	0	0	0	0	0	0	0	0
gene:Zm00001d002082	4	9	12	20	84	59	26	35	17	36	29	43	118	151	125	38	47	35	7	5	8	57	69	76	31	8	32	25	35	63	104	103	114	37	28	56
gene:Zm00001d002083	0	0	0	0	0	0	0	0	0	0	0	0	0	0	0	0	0	0	0	0	0	0	0	0	0	0	0	0	0	0	0	0	0	0	0	0
gene:Zm00001d002084	251	271	254	166	423	342	194	374	219	227	225	279	303	403	321	277	312	304	279	263	303	422	393	358	514	113	812	296	305	383	433	356	453	377	337	423
gene:Zm00001d002085	260	237	291	308	838	721	379	528	345	390	412	409	685	791	756	540	587	535	248	245	277	990	941	1005	572	143	632	297	394	381	1029	953	1104	649	629	574
gene:Zm00001d002086	34	40	29	25	64	53	38	33	26	44	38	45	52	88	47	47	29	37	29	24	18	66	57	54	57	15	103	24	36	27	73	72	90	43	40	42
gene:Zm00001d002087	145	132	116	169	446	411	151	224	120	186	161	184	390	477	427	230	242	202	120	123	111	458	447	460	373	82	518	165	156	123	514	460	539	329	303	334
gene:Zm00001d002088	1	1	2	0	0	0	0	0	1	0	0	1	0	0	0	0	1	0	1	0	1	1	1	0	1	0	2	1	0	0	2	1	0	1	0	0
gene:Zm00001d002089	5735	5723	5888	4908	11751	10748	6352	10209	5986	5611	5214	5687	9404	11389	10220	8961	9568	8676	7428	6802	7238	10271	10357	10256	8901	2045	12173	6168	5224	4767	11189	10329	11817	9976	8876	11625
gene:Zm00001d002090	92	96	117	54	181	156	135	160	79	27	27	29	143	162	145	173	177	152	105	92	102	175	205	166	192	45	289	52	37	29	205	193	208	253	268	264
gene:Zm00001d002091	46	45	43	123	329	333	101	136	67	125	120	147	299	357	276	127	94	98	31	40	34	235	263	283	139	31	172	57	68	76	253	212	276	99	101	109
gene:Zm00001d002093	1	0	1	2	0	2	0	1	0	1	0	0	2	5	1	0	1	0	0	0	0	0	0	0	0	0	0	1	0	0	0	0	0	0	1	0
gene:Zm00001d002094	11	12	16	12	22	22	1	1	0	3	1	2	37	53	39	2	4	1	8	4	4	3	2	3	0	0	0	7	1	1	5	6	5	1	2	0
gene:Zm00001d002095	275	248	283	191	506	485	143	218	144	325	305	300	440	499	476	165	210	184	229	204	206	565	496	594	238	54	385	313	329	354	533	524	609	297	264	255
gene:Zm00001d002096	0	0	0	0	0	0	0	0	0	0	0	0	0	0	0	0	0	0	0	0	0	0	0	0	0	0	0	0	0	0	0	0	0	0	0	0
gene:Zm00001d002097	0	0	0	1	0	0	0	0	0	1	0	1	0	0	0	0	0	0	0	0	1	0	0	1	1	0	1	0	0	1	2	2	3	0	1	0
gene:Zm00001d002098	12	12	11	6	17	21	4	14	5	9	5	14	17	19	16	6	4	8	9	13	8	16	25	30	6	5	12	7	4	2	34	36	47	6	9	5
gene:Zm00001d002099	886	939	938	597	1590	1368	873	1267	713	1316	1360	1396	1411	1686	1616	1616	1500	1491	956	897	924	1645	1482	1580	1208	280	1463	1241	1593	1562	3871	3669	3979	1461	1317	1434
gene:Zm00001d002100	1	1	0	1	1	2	0	2	2	1	0	0	2	2	1	0	2	0	3	0	1	1	0	1	4	1	9	0	1	0	1	3	1	1	4	3
gene:Zm00001d002101	0	0	0	0	0	0	0	0	0	0	0	0	0	0	0	0	0	0	0	0	0	0	0	0	0	0	0	0	0	0	0	0	0	0	0	0
gene:Zm00001d002103	316	307	325	90	286	217	86	121	81	209	177	199	212	226	257	156	120	126	166	153	172	208	224	220	224	56	284	201	209	191	213	207	230	150	155	165
gene:Zm00001d002104	3897	3798	3970	1469	3549	3342	1348	2089	1135	2743	2807	2710	2732	3103	2898	2104	2178	1915	2413	2231	2333	2941	2798	2940	1654	372	2199	2331	2360	2236	2928	2975	3085	1958	1825	1951
gene:Zm00001d002105	488	458	553	393	861	794	426	611	441	526	553	490	776	789	868	605	629	520	434	402	484	978	828	988	662	168	714	429	562	505	775	832	858	702	617	550
gene:Zm00001d002106	0	0	0	0	0	0	0	0	0	0	0	0	0	0	0	0	0	0	0	0	0	0	0	0	0	0	0	0	0	0	0	0	0	0	0	0
gene:Zm00001d002107	0	0	0	0	0	0	0	0	0	0	0	0	0	0	0	0	0	0	0	0	0	0	0	0	0	0	0	0	0	0	0	0	0	0	0	0
gene:Zm00001d002108	0	0	0	0	0	0	0	0	0	0	0	0	0	0	0	0	0	0	0	0	0	0	0	0	0	0	0	0	0	0	0	0	0	0	0	0
gene:Zm00001d002109	0	0	0	0	0	0	0	0	0	0	0	0	0	0	0	0	0	0	0	0	0	0	0	0	0	0	0	0	0	0	0	0	0	0	0	0
gene:Zm00001d002110	1	0	1	0	0	0	0	0	1	2	0	1	0	18	0	1	1	0	0	0	0	0	0	0	0	0	0	0	1	0	0	0	1	0	0	0
gene:Zm00001d002111	114	126	106	131	319	305	133	172	94	292	280	313	340	373	337	217	286	244	151	138	156	331	320	356	219	74	294	216	297	334	351	295	359	201	183	250
gene:Zm00001d002112	0	0	0	0	0	0	0	0	0	0	0	0	0	0	0	0	0	0	0	0	0	0	0	0	0	0	0	0	0	0	0	0	0	0	0	0
gene:Zm00001d002113	30	32	37	21	58	38	17	34	16	22	17	28	34	49	32	28	27	36	113	105	123	190	155	188	271	54	302	146	161	155	206	158	207	191	176	308
gene:Zm00001d002115	5	5	2	1	4	4	2	3	2	6	4	4	4	3	3	2	0	1	7	5	8	6	7	3	6	2	7	3	9	6	11	8	17	8	9	15
gene:Zm00001d002116	1	0	0	0	1	2	1	0	1	1	0	0	2	2	1	0	3	0	1	0	0	0	1	1	0	0	1	0	0	0	1	0	3	1	0	0
gene:Zm00001d002117	0	0	0	0	0	0	0	0	0	0	0	0	0	0	0	0	0	0	0	0	0	0	0	0	0	0	0	0	0	0	0	0	0	0	0	0
gene:Zm00001d002119	5	2	12	2	6	11	1	3	0	5	0	3	5	9	5	4	6	0	4	0	5	7	8	7	0	3	3	8	3	6	12	4	5	5	5	8
gene:Zm00001d002120	0	2	0	0	1	0	0	0	0	0	1	3	0	1	0	1	0	0	4	4	2	1	5	1	3	0	4	4	5	3	2	9	4	3	5	3
gene:Zm00001d002121	0	2	0	0	0	0	0	0	0	0	0	0	2	0	2	0	0	0	0	0	1	2	0	2	5	0	5	0	1	0	1	2	0	0	0	0
gene:Zm00001d002122	880	839	905	868	2204	2023	898	1264	773	1326	1202	1335	1832	2043	1915	1354	1370	1327	999	989	1065	2112	1973	2321	1742	424	2660	1318	1549	1594	2310	2318	2501	1586	1580	1579
gene:Zm00001d002123	0	0	0	0	0	0	0	0	0	0	0	0	0	0	0	0	0	0	0	0	0	0	0	0	0	0	0	0	0	0	0	0	0	0	0	0
gene:Zm00001d002124	0	1	3	0	0	0	1	0	0	1	0	0	0	0	0	0	0	0	0	0	0	0	0	0	0	0	0	0	0	0	0	0	0	1	0	0
gene:Zm00001d002125	269	285	262	267	603	517	142	213	98	186	194	247	489	573	483	181	206	188	173	155	164	612	585	627	277	71	330	171	205	202	594	549	627	237	174	226
gene:Zm00001d002126	1100	1071	1205	133	309	276	189	282	147	282	291	279	245	288	244	324	313	294	1169	1085	1156	614	543	573	844	214	941	802	435	430	547	553	587	652	548	661
gene:Zm00001d002127	12	7	11	0	5	1	0	2	0	2	5	2	0	1	4	1	3	3	5	13	12	3	3	3	3	5	9	8	12	15	5	2	3	9	6	4
gene:Zm00001d002128	23	25	21	4	7	15	35	42	31	19	9	16	9	15	12	68	70	56	33	25	43	52	49	37	115	36	126	33	68	56	79	57	74	81	85	86
gene:Zm00001d002129	5374	5412	5564	425	1044	925	4608	7430	4333	3956	3732	4129	964	1174	1025	7234	7704	7010	7741	7315	7941	796	767	853	9065	2273	12884	6131	4635	4691	872	792	923	7763	6924	10720
gene:Zm00001d002130	3967	3829	3927	870	2150	2073	2124	3143	1822	3657	3418	3693	1990	2349	2236	3602	3644	3290	3986	3838	4219	1729	1570	1834	3480	857	4981	4074	3607	3868	1857	1867	2101	3117	2977	3137
gene:Zm00001d002131	25	20	27	18	47	42	36	56	36	22	36	27	43	66	51	94	75	65	49	61	59	43	48	48	122	27	156	43	47	59	45	32	49	75	46	76
gene:Zm00001d002132	1	1	2	0	0	1	3	0	2	0	0	0	0	0	0	3	2	2	0	1	2	0	0	0	1	1	0	2	0	0	0	0	0	1	0	0
gene:Zm00001d002133	0	0	0	0	0	0	0	0	0	0	0	0	0	0	0	0	0	0	0	0	0	0	0	0	0	0	1	0	0	0	0	0	0	0	0	0
gene:Zm00001d002134	3	1	3	0	3	3	0	5	0	4	1	5	1	2	0	0	1	0	2	5	3	1	1	2	0	1	5	2	2	2	2	6	6	1	3	0
gene:Zm00001d002135	1157	1215	1218	1336	3371	3054	1660	2522	1425	1532	1583	1629	2434	2981	2662	2699	2830	2524	1353	1377	1397	3550	3333	3836	2981	723	3983	1501	1775	1741	3697	3371	3997	3070	2654	3716
gene:Zm00001d002136	21	20	22	1	1	3	0	0	1	14	16	7	3	5	1	0	1	0	3	7	8	1	1	5	1	0	0	9	16	8	4	2	3	1	1	0
gene:Zm00001d002137	16	16	19	21	41	51	30	48	23	13	8	23	26	33	42	52	55	57	11	12	20	37	28	42	42	11	49	23	22	18	33	36	32	36	46	39
gene:Zm00001d002138	0	1	0	0	0	1	0	0	0	0	0	0	0	0	0	1	0	1	0	0	0	0	0	0	0	0	0	0	0	0	0	0	0	0	0	0
gene:Zm00001d002139	32	51	39	7	10	11	2	2	2	11	8	14	14	7	12	4	8	1	47	34	35	21	18	20	8	1	14	33	16	20	28	28	27	8	7	4
gene:Zm00001d002140	175	165	141	69	185	168	89	120	95	193	190	199	159	196	187	155	165	134	150	125	157	160	163	190	159	32	200	174	177	186	202	184	222	139	122	153
gene:Zm00001d002141	1848	1860	1885	1456	3473	3195	1017	1570	988	2798	2768	2838	2465	2837	2657	1303	1343	1276	2372	2249	2369	3833	3629	4173	2528	666	3241	2467	2639	2680	3359	3248	3455	1952	1874	1865
gene:Zm00001d002143	43	42	42	46	123	105	52	70	33	46	46	42	79	104	100	77	84	78	62	65	64	177	152	172	157	28	121	51	45	36	166	148	188	116	97	116
gene:Zm00001d002144	0	0	0	1	0	0	0	0	0	0	0	0	0	0	0	0	0	0	0	0	0	2	0	0	1	0	0	0	0	0	0	1	0	0	0	0
gene:Zm00001d002145	210	179	241	135	296	282	222	339	194	241	231	209	237	212	245	368	414	348	223	242	268	257	190	218	375	71	555	235	282	250	285	235	250	377	365	412
gene:Zm00001d002146	49	52	57	7	10	4	55	97	65	47	41	53	9	2	9	97	101	103	59	67	55	11	3	10	114	32	96	47	48	38	6	10	11	99	85	99
gene:Zm00001d002147	92	84	103	58	127	129	48	35	30	85	108	80	108	141	127	44	60	44	111	97	108	121	101	115	69	23	103	116	105	120	173	140	181	78	91	78
gene:Zm00001d002148	1099	1091	1127	481	1129	1044	607	920	597	1172	1127	1166	948	1146	1036	1129	1048	1080	1006	946	1076	1153	1149	1277	1190	239	1623	1229	1310	1360	1309	1359	1403	1227	1212	1048
gene:Zm00001d002149	69	100	100	48	158	121	91	131	87	93	97	95	128	154	132	110	133	105	92	78	95	170	176	150	151	34	193	98	119	123	198	143	180	172	130	152
gene:Zm00001d002150	0	0	0	0	0	0	0	0	0	0	0	0	0	0	0	0	0	0	0	0	0	0	0	0	0	0	0	0	0	0	0	0	0	0	0	0
gene:Zm00001d002153	85	90	84	44	101	91	41	65	42	83	80	105	67	92	85	97	82	83	158	122	135	100	89	134	105	25	135	114	93	99	101	117	121	134	113	124
gene:Zm00001d002154	41	55	51	86	277	203	43	64	39	83	82	75	184	238	227	71	71	74	71	72	78	307	288	326	110	28	154	95	111	88	241	231	315	108	70	141
gene:Zm00001d002155	376	344	357	235	603	571	259	314	190	498	490	551	562	649	569	415	393	397	482	428	505	639	631	681	580	156	786	575	620	689	754	776	789	568	543	463
gene:Zm00001d002156	377	391	449	163	400	334	191	316	193	290	311	381	322	452	394	348	332	298	376	340	411	283	267	316	297	88	432	283	254	299	347	322	362	279	209	262
gene:Zm00001d002157	7	6	11	11	46	38	4	14	5	20	23	23	40	56	38	12	17	13	9	7	15	47	36	49	8	1	17	10	26	23	44	35	37	15	8	11
gene:Zm00001d002158	89	57	69	41	67	58	2	1	0	21	17	14	10	19	20	7	5	1	57	36	52	10	18	16	0	0	2	25	2	2	3	6	4	0	0	0
gene:Zm00001d002159	248	259	334	137	282	257	31	71	36	152	143	140	125	140	119	74	95	58	179	148	173	154	117	157	63	18	74	152	95	88	83	92	114	31	35	35
gene:Zm00001d002160	24	21	26	30	53	64	5	8	2	13	8	6	21	23	28	25	19	10	58	73	63	39	26	35	23	5	45	46	14	9	18	19	24	33	18	24
gene:Zm00001d002161	1	2	0	10	18	14	0	1	0	2	2	1	7	4	6	1	2	0	1	1	1	3	5	4	2	2	0	1	1	1	3	4	4	2	1	0
gene:Zm00001d002163	852	783	848	357	918	774	433	601	375	918	860	953	733	869	751	660	684	599	470	483	495	601	555	546	707	188	871	498	517	483	709	654	695	501	495	574
gene:Zm00001d002164	108	115	118	65	212	145	118	203	123	110	119	105	134	190	152	128	170	147	83	86	92	173	171	168	232	51	273	98	119	93	171	137	170	173	152	207
gene:Zm00001d002166	684	694	722	331	869	803	541	827	550	651	649	684	753	859	862	892	886	762	630	587	617	737	696	708	739	208	1093	593	637	595	788	704	803	698	707	750
gene:Zm00001d002167	15	10	12	19	53	52	27	42	19	17	22	21	29	40	41	47	52	55	15	20	18	44	32	44	55	7	83	21	19	25	35	40	45	50	53	48
gene:Zm00001d002168	27	21	35	49	86	98	28	44	17	18	5	19	63	89	109	65	61	66	45	32	49	218	166	181	167	53	191	36	34	35	154	168	180	123	94	119
gene:Zm00001d002169	632	609	629	309	712	711	378	555	335	565	516	527	624	752	686	505	537	480	599	576	636	587	544	578	465	84	637	511	546	522	659	625	700	514	488	495
gene:Zm00001d002172	18	12	14	23	64	53	8	19	7	35	24	46	57	63	59	30	22	29	36	32	43	69	52	75	33	10	38	37	42	36	93	72	110	33	23	28
gene:Zm00001d002173	0	0	0	0	0	0	0	0	0	0	0	0	0	0	0	0	0	0	0	0	0	0	0	0	0	0	0	0	0	0	0	0	0	0	0	0
gene:Zm00001d002174	102	70	139	96	208	186	98	142	90	126	107	112	166	165	156	202	252	220	105	93	103	228	213	207	162	44	272	122	113	117	227	210	203	156	141	177
gene:Zm00001d002175	1284	1173	1390	370	948	862	388	511	354	396	433	429	822	922	933	836	868	774	953	943	951	1033	921	956	600	148	601	694	509	478	1105	1034	1185	640	590	596
gene:Zm00001d002176	0	0	0	0	0	0	0	0	0	0	0	0	0	0	0	0	0	0	0	0	0	0	0	0	0	0	1	0	0	0	0	0	0	0	0	0
gene:Zm00001d002178	0	0	0	5	1	1	4	8	1	0	0	1	4	0	3	1	3	4	0	0	1	23	22	31	6	2	8	3	2	5	30	31	27	7	12	25
gene:Zm00001d002179	0	0	0	1	1	3	0	0	0	1	1	2	1	1	0	0	1	0	1	0	1	0	1	3	1	1	4	0	1	1	0	0	1	3	0	0
gene:Zm00001d002181	43	45	50	32	89	69	65	103	69	180	171	180	55	91	76	138	173	132	48	39	43	85	88	88	101	14	119	106	179	180	96	73	103	72	53	83
gene:Zm00001d002182	1	0	1	2	10	3	9	9	2	4	7	6	1	0	2	6	8	5	5	7	5	12	13	7	32	8	39	16	26	12	8	7	8	12	13	14
gene:Zm00001d002184	42	50	62	55	169	151	90	128	84	87	83	95	136	182	174	169	171	162	64	55	35	154	153	182	199	48	256	66	95	95	204	199	239	220	157	187
gene:Zm00001d002185	36	38	33	58	151	153	13	16	10	58	46	35	96	93	105	25	23	21	26	22	25	145	151	171	35	5	47	38	46	34	118	131	136	19	23	26
gene:Zm00001d002186	80	72	91	15	50	35	8	19	12	41	44	46	94	81	67	20	30	15	30	34	33	67	68	57	78	10	100	51	58	54	98	106	92	45	41	43
gene:Zm00001d002187	0	0	0	0	0	0	0	0	0	1	0	0	0	0	0	0	0	0	0	0	0	0	0	2	0	0	0	1	0	0	0	1	0	0	0	0
gene:Zm00001d002188	6	9	8	2	5	11	8	7	0	6	5	9	8	9	9	10	5	3	6	10	4	6	7	9	2	0	5	7	4	6	7	10	9	13	2	5
gene:Zm00001d002189	0	0	0	0	0	0	0	0	0	0	0	0	0	0	0	0	0	0	0	0	0	0	0	0	0	0	0	0	0	0	0	0	0	0	0	0
gene:Zm00001d002190	322	306	328	205	551	553	109	150	71	369	357	334	480	590	574	188	185	194	308	337	332	545	575	614	231	29	305	379	380	375	645	557	625	228	204	245
gene:Zm00001d002191	29	33	39	2	14	27	66	105	54	11	13	15	20	17	13	173	178	166	43	41	51	31	13	28	120	34	122	36	12	18	18	23	20	119	140	108
gene:Zm00001d002192	0	0	0	0	0	0	0	0	0	0	0	0	0	0	0	0	0	0	0	0	0	0	0	0	0	0	0	0	0	0	0	0	0	0	0	0
gene:Zm00001d002193	0	0	0	0	0	0	0	0	0	0	0	0	0	0	0	0	0	0	0	0	0	0	0	0	0	0	0	0	0	0	0	0	0	0	0	0
gene:Zm00001d002194	0	0	0	0	0	0	0	0	0	0	0	0	0	0	0	0	0	0	0	0	0	0	0	0	0	0	0	0	0	0	0	0	0	0	0	0
gene:Zm00001d002195	0	0	0	0	0	0	0	0	0	0	0	0	0	0	3	0	0	0	0	1	0	1	0	0	0	0	0	0	0	2	3	1	0	0	0	0
gene:Zm00001d002198	3	3	10	4	9	7	11	18	7	1	8	5	3	5	8	23	13	7	3	3	8	13	21	19	27	4	25	3	5	6	9	6	8	15	9	10
gene:Zm00001d002199	1	4	0	2	6	1	6	2	5	3	2	2	2	4	1	8	3	6	1	1	0	2	1	0	4	1	1	1	0	0	1	1	2	2	1	1
gene:Zm00001d002200	68	78	86	36	109	113	78	128	73	72	69	95	96	111	108	116	166	126	124	104	101	113	112	114	127	40	137	106	97	108	134	95	150	147	134	121
gene:Zm00001d002202	0	0	0	0	0	0	0	0	0	0	0	0	0	0	0	0	0	0	0	0	0	0	0	0	0	0	0	0	0	0	0	0	0	0	0	0
gene:Zm00001d002203	0	0	0	0	0	0	0	0	0	0	0	0	0	0	0	0	0	0	0	0	0	0	0	0	0	0	0	0	0	0	0	0	0	0	0	0
gene:Zm00001d002204	0	0	0	0	0	0	0	0	0	0	0	0	0	0	0	0	0	0	0	0	0	0	0	0	0	0	0	0	0	0	0	0	0	0	0	0
gene:Zm00001d002205	0	0	0	0	0	0	0	0	0	0	0	0	0	0	0	0	0	0	0	0	0	0	0	0	0	0	0	0	0	0	0	0	0	0	0	0
gene:Zm00001d002206	0	0	0	0	0	0	0	0	0	0	0	0	0	0	0	0	0	0	0	0	0	0	0	0	0	0	0	0	0	0	0	0	0	0	0	0
gene:Zm00001d002207	0	0	0	0	0	0	0	0	0	0	0	0	0	0	0	0	0	0	0	0	0	0	0	0	0	0	0	0	0	0	0	0	0	0	0	0
gene:Zm00001d002208	0	0	0	0	0	1	0	0	0	0	0	0	0	0	0	0	0	0	0	0	0	0	0	0	0	0	0	0	0	0	0	0	0	0	0	0
gene:Zm00001d002209	0	0	0	0	0	0	0	0	0	0	0	0	0	0	0	0	0	0	0	0	0	0	0	0	0	0	0	0	0	0	0	0	0	0	0	0
gene:Zm00001d002211	0	0	0	0	0	0	0	0	1	0	0	0	0	0	0	0	0	0	0	1	0	0	0	0	0	0	0	0	0	0	0	0	0	0	0	1
gene:Zm00001d002212	0	0	0	0	0	0	0	0	0	0	0	0	0	1	0	0	0	0	0	0	0	0	0	0	0	0	1	0	0	0	0	0	0	0	0	0
gene:Zm00001d002213	0	1	2	2	7	2	0	2	1	3	4	2	4	8	7	0	2	2	3	1	2	4	4	3	0	1	3	1	2	4	8	8	4	2	1	6
gene:Zm00001d002214	0	0	0	0	0	0	0	0	0	0	0	0	0	0	0	0	0	0	0	0	0	0	0	0	0	0	0	0	0	0	0	0	0	0	0	0
gene:Zm00001d002215	0	1	2	2	0	1	1	3	1	1	0	0	1	1	1	0	3	0	3	1	4	5	4	5	2	0	5	2	2	4	2	2	1	1	2	9
gene:Zm00001d002216	16	24	22	11	27	16	13	21	8	39	28	35	16	22	24	24	22	21	30	22	29	16	21	27	15	5	20	28	25	28	30	17	19	26	23	19
gene:Zm00001d002217	1	0	0	0	0	0	0	0	0	1	0	0	0	0	0	0	0	0	0	0	0	0	0	0	0	0	0	2	0	0	0	0	0	0	0	1
gene:Zm00001d002218	0	0	0	0	0	0	0	0	0	0	0	0	0	0	0	0	0	0	0	0	0	0	0	0	0	0	0	0	0	0	0	0	0	0	0	0
gene:Zm00001d002220	0	0	0	0	0	0	0	0	0	0	0	0	0	0	0	0	0	0	0	0	0	0	0	0	0	0	0	0	0	0	0	0	0	0	0	0
gene:Zm00001d002221	0	0	0	0	0	0	0	0	0	0	0	0	0	0	0	0	0	0	0	0	0	0	0	0	0	0	0	0	0	0	0	0	0	0	0	0
gene:Zm00001d002223	0	0	0	0	0	0	0	0	0	0	0	0	0	0	0	0	0	0	0	0	0	0	0	0	0	0	0	0	0	0	0	0	0	0	0	0
gene:Zm00001d002224	0	0	0	0	0	0	0	0	0	0	0	0	0	0	0	0	0	0	0	0	0	0	0	0	0	0	0	0	0	0	0	0	0	0	0	0
gene:Zm00001d002225	0	0	0	0	0	0	0	0	0	0	0	0	0	0	0	0	0	0	0	0	0	0	0	0	0	0	0	0	0	0	0	0	0	0	0	0
gene:Zm00001d002226	0	0	0	0	0	0	0	0	0	0	0	0	0	0	0	0	0	0	0	0	0	0	0	0	0	0	0	0	0	0	0	0	0	0	0	0
gene:Zm00001d002227	0	0	0	0	0	0	0	0	0	0	0	0	0	0	0	0	0	0	0	0	0	0	0	0	0	0	0	0	0	0	0	0	0	0	0	0
gene:Zm00001d002228	0	0	0	0	0	0	0	0	0	0	0	0	0	0	0	0	0	0	0	0	0	0	0	0	0	0	0	0	0	0	0	0	0	0	0	0
gene:Zm00001d002229	0	0	0	0	0	0	0	0	0	0	0	0	0	0	0	0	0	0	0	0	0	0	0	0	0	0	0	0	0	0	0	0	0	0	0	0
gene:Zm00001d002230	0	0	0	0	0	0	0	0	0	0	0	0	0	0	0	0	0	0	0	0	0	0	0	0	0	0	0	0	0	0	0	0	0	0	0	0
gene:Zm00001d002231	0	0	0	0	0	0	0	0	0	0	0	0	0	0	0	0	0	0	0	0	0	0	0	0	0	0	0	0	0	0	0	0	0	0	0	0
gene:Zm00001d002232	1	3	1	0	1	2	2	5	1	6	3	3	4	2	2	0	2	3	2	6	5	5	0	4	2	0	3	7	2	5	6	5	4	1	0	1
gene:Zm00001d002234	309	249	260	274	689	679	242	355	207	209	200	210	453	554	539	478	518	397	211	202	225	441	390	453	343	94	400	186	150	182	417	417	495	402	308	361
gene:Zm00001d002235	557	562	558	425	1286	1059	754	1159	698	721	664	737	1008	1299	981	1039	1088	1027	585	576	662	1293	1255	1272	1596	349	1995	686	833	856	1200	1151	1328	1181	1045	1658
gene:Zm00001d002236	0	0	0	0	0	0	0	0	0	0	0	0	0	0	0	0	0	0	0	0	0	0	0	0	0	0	0	0	0	0	0	0	0	0	0	0
gene:Zm00001d002238	0	1	1	8	26	13	0	1	0	284	316	266	4	9	5	0	1	0	7	7	12	7	7	12	0	0	0	113	259	224	13	9	14	0	0	0
gene:Zm00001d002239	0	0	0	0	0	0	0	0	0	0	0	0	0	0	0	0	0	0	1	2	0	0	0	0	0	0	0	0	1	0	0	2	0	0	0	0
gene:Zm00001d002240	2494	2540	2632	640	1644	1505	695	998	560	2637	2547	2647	1135	1369	1290	1016	1053	876	1033	923	945	1159	1072	1142	776	181	1049	1177	1544	1453	1146	1186	1258	750	726	690
gene:Zm00001d002241	333	384	371	146	344	317	331	507	278	329	310	322	288	381	286	479	493	526	363	377	398	385	393	407	757	148	1040	370	327	364	382	409	441	648	524	657
gene:Zm00001d002242	0	0	0	0	0	0	0	1	0	0	0	0	0	0	0	0	0	0	0	0	0	0	0	0	0	0	0	0	0	0	0	0	0	0	0	0
gene:Zm00001d002243	138	127	111	131	339	357	183	280	136	125	109	120	327	406	336	282	315	294	99	116	116	270	300	310	328	75	439	121	115	125	358	332	353	395	329	334
gene:Zm00001d002244	1049	977	1032	536	1340	1212	843	1221	685	1388	1330	1396	1192	1354	1217	1298	1426	1312	1128	944	1043	1222	1134	1293	1464	333	1831	1137	1339	1303	1388	1371	1538	1498	1278	1418
gene:Zm00001d002246	545	502	559	281	774	688	380	599	302	610	590	597	592	760	679	600	558	562	473	459	488	904	871	904	727	146	1018	510	598	582	914	871	963	698	654	642
gene:Zm00001d002247	1	1	0	0	1	3	0	0	0	0	0	0	1	1	0	1	0	0	0	0	0	1	0	1	0	0	0	0	0	0	0	4	5	0	0	1
gene:Zm00001d002249	0	0	0	0	0	0	0	0	0	0	0	0	0	0	0	0	0	0	0	0	0	0	0	0	0	0	1	0	0	0	0	0	2	0	0	0
gene:Zm00001d002250	349	361	378	409	896	805	337	540	319	423	315	390	740	881	797	482	539	504	357	352	331	778	770	823	402	91	550	333	456	394	805	796	878	568	475	632
gene:Zm00001d002251	0	0	0	0	0	0	0	0	0	0	0	0	0	1	0	0	0	0	0	0	0	0	0	0	0	0	0	0	0	0	1	0	0	0	0	1
gene:Zm00001d002252	72	54	55	38	84	84	18	41	20	52	65	58	110	91	109	36	48	55	21	31	20	112	104	105	58	15	91	20	20	16	158	141	158	50	40	53
gene:Zm00001d002253	73	71	86	24	62	56	34	49	29	63	62	50	82	76	76	56	44	51	52	52	64	56	42	62	50	10	45	43	41	41	57	72	59	60	47	27
gene:Zm00001d002254	0	0	0	0	0	0	0	0	0	0	0	0	0	0	0	0	0	0	0	0	0	0	0	0	0	0	0	0	0	0	0	0	0	0	0	0
gene:Zm00001d002255	0	0	0	0	0	0	0	0	0	0	2	0	1	2	0	0	1	0	0	0	0	0	0	0	0	0	0	0	0	0	0	0	1	0	0	0
gene:Zm00001d002256	4412	4419	4733	518	1190	1166	3847	6473	3772	2834	2714	2857	1019	1139	1168	6761	7056	6351	5320	4643	5098	1049	1009	1022	6020	1415	6566	3959	3132	2918	1083	1079	1202	6524	5591	8003
gene:Zm00001d002257	908	908	971	811	2069	1966	816	1166	630	1537	1520	1594	1589	1851	1751	1211	1277	1142	896	905	968	1790	1696	1822	1547	378	1799	1287	1602	1681	2060	1814	2089	1450	1407	1341
gene:Zm00001d002258	9112	8521	9520	1866	4341	4071	3076	4275	2588	7249	7431	7088	3875	4447	4230	4549	4753	4340	7070	6581	7261	3307	3015	3395	5157	1269	4913	6263	6373	5725	3395	3549	3799	4146	3559	3965
gene:Zm00001d002259	277	277	269	147	361	368	173	279	152	295	296	283	336	430	350	364	361	346	229	250	247	383	324	358	400	77	629	239	277	293	396	397	373	358	325	408
gene:Zm00001d002260	2	2	2	8	14	16	0	1	0	38	30	30	15	22	19	1	0	0	13	15	11	76	73	90	3	0	3	56	111	133	89	72	79	5	2	6
gene:Zm00001d002261	27	22	29	123	332	325	77	110	52	66	72	52	220	265	249	136	141	107	87	82	98	469	466	546	201	38	190	90	106	97	493	480	505	352	295	328
gene:Zm00001d002262	0	0	0	0	0	0	0	0	0	0	0	0	0	0	0	0	0	0	0	0	0	0	0	0	0	0	0	0	0	0	0	0	1	1	0	0
gene:Zm00001d002263	12	0	0	1	0	1	0	2	19	0	0	18	26	5	31	0	0	2	15	0	0	0	0	1	0	0	6	0	14	21	5	5	3	2	0	1
gene:Zm00001d002266	2303	2225	2452	298	678	587	557	861	475	877	805	843	689	832	702	783	818	776	2059	1862	2010	678	566	669	905	213	1010	1590	1250	1306	840	810	963	1027	882	1000
gene:Zm00001d002267	797	712	812	258	615	613	87	147	77	881	903	982	531	549	596	96	122	107	872	832	912	630	560	649	201	63	309	948	1101	1099	603	619	699	208	173	190
gene:Zm00001d002268	0	0	0	0	0	0	0	0	0	0	0	0	0	0	0	0	0	0	0	0	0	0	0	0	0	0	0	0	0	0	0	0	0	0	0	0
gene:Zm00001d002269	0	0	0	0	0	0	0	0	0	0	0	0	0	1	0	0	0	0	0	0	0	0	0	0	0	0	0	0	0	0	0	0	0	0	0	0
gene:Zm00001d002271	2	0	0	2	1	0	0	0	0	0	0	0	0	0	1	0	1	1	0	0	1	0	0	1	0	1	2	0	2	1	0	1	0	0	1	3
gene:Zm00001d002272	1114	1154	1086	802	2035	1837	1106	1636	1006	1649	1496	1589	1603	1817	1759	1605	1727	1600	1348	1311	1419	1538	1510	1591	1131	283	1488	1613	1994	1837	1669	1665	1762	1652	1536	1823
gene:Zm00001d002274	17	16	13	10	19	19	10	8	3	15	8	20	26	19	17	13	10	20	29	20	27	17	20	27	6	2	20	19	20	23	31	44	32	13	9	6
gene:Zm00001d002275	7906	7910	7947	4301	10167	9321	3997	6561	3802	13720	13368	13984	7985	8983	8609	4534	4669	4269	6538	5871	6202	9086	8811	8974	5383	1286	6608	8168	10789	9890	9451	8830	9591	5704	5366	6474
gene:Zm00001d002276	0	0	1	1	0	0	0	1	0	0	0	1	0	0	0	0	0	0	0	0	0	0	0	0	0	0	1	1	1	2	0	1	0	0	0	0
gene:Zm00001d002277	133	161	169	18	30	25	19	19	11	24	17	20	31	31	26	40	40	35	91	74	93	47	37	37	45	11	55	46	13	22	45	49	59	44	35	44
gene:Zm00001d002278	1	0	2	4	0	0	2	2	1	0	1	2	2	2	1	0	0	0	0	1	1	2	1	1	6	1	5	0	1	0	2	2	0	8	6	5
gene:Zm00001d002279	0	0	0	0	0	0	0	0	0	0	0	0	0	0	0	0	0	0	0	0	0	0	0	0	0	0	0	0	0	0	0	0	0	0	0	0
gene:Zm00001d002280	0	0	0	0	0	0	0	0	0	0	0	0	0	0	0	0	0	0	0	0	0	0	0	0	0	0	0	0	0	0	0	0	0	0	0	0
gene:Zm00001d002281	0	0	0	0	0	0	0	0	0	0	0	0	0	0	0	0	0	0	0	0	0	0	0	0	0	0	0	0	0	0	0	0	0	0	0	0
gene:Zm00001d002282	32	37	35	37	71	65	23	28	20	47	43	46	65	80	97	46	41	33	27	25	35	68	64	71	40	6	35	29	53	37	70	102	85	40	41	45
gene:Zm00001d002283	14	21	22	32	110	94	44	58	43	39	19	33	134	154	146	151	136	146	38	17	26	193	163	186	110	18	114	45	66	66	203	191	220	109	84	87
gene:Zm00001d002284	45	46	71	6	12	13	5	17	6	11	3	7	17	26	21	22	12	16	9	10	13	14	8	12	23	4	32	4	7	2	26	19	18	10	13	12
gene:Zm00001d002285	0	0	0	0	2	0	1	2	2	0	0	0	1	1	1	4	8	8	0	0	0	1	1	2	0	0	0	0	1	0	4	2	2	2	1	0
gene:Zm00001d002286	0	1	0	0	0	0	0	0	0	0	0	0	0	0	1	0	0	0	0	0	0	0	0	0	0	0	0	0	0	0	0	0	0	0	0	0
gene:Zm00001d002287	155	204	190	174	469	381	74	105	78	82	78	75	808	841	853	498	518	432	103	102	105	457	372	477	100	30	77	59	46	27	666	628	732	189	176	179
gene:Zm00001d002288	55	67	79	3	13	11	16	34	22	33	29	24	16	15	10	37	45	44	107	137	134	33	24	24	66	25	116	93	78	68	23	18	20	42	31	65
gene:Zm00001d002290	2	8	7	7	13	8	0	4	5	4	2	3	15	17	8	15	14	12	9	9	8	20	17	28	9	2	5	12	5	8	13	28	31	3	6	5
gene:Zm00001d002292	535	522	527	176	433	400	213	255	148	297	287	310	406	469	409	438	507	469	300	299	337	478	442	477	375	83	521	280	330	315	540	547	591	351	369	397
gene:Zm00001d002295	1	0	1	0	0	0	0	0	1	1	0	0	0	1	0	0	0	0	0	0	0	2	4	3	7	2	3	1	0	0	1	5	7	1	1	4
gene:Zm00001d002296	157	173	184	108	220	247	96	147	68	160	145	142	166	221	182	146	136	143	243	224	224	300	299	323	165	58	247	247	255	262	350	304	389	226	220	209
gene:Zm00001d002299	0	0	0	0	0	0	0	0	0	1	0	0	0	0	0	0	0	0	0	0	0	0	0	0	0	0	0	0	0	0	0	0	0	0	0	0
gene:Zm00001d002301	150	139	125	56	134	108	51	66	53	99	93	88	106	107	110	86	83	76	135	129	149	103	109	111	90	23	133	116	88	87	97	119	131	88	76	69
gene:Zm00001d002302	77	77	89	32	129	94	54	99	52	76	86	81	99	115	86	95	118	99	3	1	2	3	3	3	0	0	1	5	5	3	7	4	7	2	4	1
gene:Zm00001d002304	0	0	0	0	0	0	0	0	0	0	1	0	0	0	0	3	2	2	0	0	0	2	1	0	0	1	1	0	1	1	2	0	2	0	2	1
gene:Zm00001d002305	4	7	9	8	26	16	11	12	6	7	11	9	17	11	21	9	12	10	0	0	0	0	0	0	0	0	0	0	0	0	0	0	0	0	0	0
gene:Zm00001d002307	41	31	34	25	64	52	44	70	50	24	31	43	41	70	61	74	93	75	41	40	32	44	42	59	83	18	108	26	22	32	51	42	47	41	41	71
gene:Zm00001d002308	0	0	0	0	0	0	0	0	0	0	0	0	0	0	0	0	0	0	0	0	0	0	0	0	0	0	0	0	0	0	0	0	0	0	0	0
gene:Zm00001d002309	25	28	30	10	9	8	3	10	3	54	46	54	6	13	15	8	11	4	23	24	16	8	8	20	5	0	5	35	49	46	11	16	11	18	16	10
gene:Zm00001d002311	0	1	0	0	1	1	0	0	0	0	0	1	0	0	0	0	0	0	0	0	0	1	0	1	0	0	0	1	0	0	0	0	0	0	0	1
gene:Zm00001d002312	301	289	296	67	164	145	50	76	58	275	291	326	83	131	109	106	133	109	246	295	252	220	217	282	253	63	321	338	410	417	223	199	234	214	197	272
gene:Zm00001d002313	398	396	397	346	824	772	206	355	206	1895	1671	1944	614	762	661	322	362	330	725	712	848	994	1008	1084	751	192	926	2053	3480	3377	970	874	1103	523	498	734
gene:Zm00001d002314	107	89	123	59	141	114	65	58	31	112	100	102	134	126	133	81	65	73	95	84	108	156	152	155	103	30	147	103	106	117	167	169	186	93	107	89
gene:Zm00001d002315	426	444	457	70	240	205	233	302	223	280	229	232	212	256	197	292	325	312	354	341	369	269	251	287	609	139	956	324	247	266	253	251	259	426	381	455
gene:Zm00001d002316	32	22	21	25	36	39	29	41	28	21	17	11	37	44	40	116	120	106	42	38	38	64	41	51	88	26	88	37	17	16	59	67	66	80	64	92
gene:Zm00001d002317	421	382	401	390	962	878	256	365	258	501	458	505	722	857	803	392	404	415	510	498	594	767	732	782	376	94	449	548	646	629	850	665	854	368	340	409
gene:Zm00001d002318	0	0	0	0	0	0	0	0	0	0	0	0	0	0	0	0	0	0	0	0	0	0	0	0	0	0	0	0	0	0	0	0	0	0	0	0
gene:Zm00001d002319	1	1	0	0	1	0	1	1	0	0	1	0	0	0	0	0	1	1	0	1	1	0	0	0	0	0	0	1	0	0	0	0	2	0	0	0
gene:Zm00001d002320	1	0	1	0	0	0	1	4	0	0	1	0	2	4	2	2	1	0	4	2	0	7	8	3	3	1	10	1	0	3	2	3	7	4	2	8
gene:Zm00001d002322	0	0	0	0	0	0	1	0	0	0	0	0	0	0	0	0	0	0	0	0	0	1	0	0	1	0	0	0	0	0	0	0	0	0	0	0
gene:Zm00001d002323	1072	1080	1075	1011	2390	2208	815	1204	696	1707	1603	1792	2225	2653	2327	911	993	890	569	557	572	614	564	578	582	137	619	467	487	465	625	541	680	476	439	485
gene:Zm00001d002324	5	1	1	1	0	0	16	20	8	0	1	0	1	0	2	26	31	25	1	2	4	0	2	1	58	9	73	1	0	2	0	1	0	21	27	31
gene:Zm00001d002325	47313	47151	47455	1343	3118	2764	38802	64964	37526	5886	5454	6135	2317	2638	2563	61861	62380	56970	37459	33594	35707	2025	2096	2207	27127	6007	42526	20881	4153	4031	2529	2409	2600	51168	47496	63228
gene:Zm00001d002326	4927	4828	5008	1789	4468	4061	2199	3207	2094	5457	5196	5287	3970	4641	4410	4967	4922	4353	3750	3615	3568	5136	4872	5326	2913	670	3594	4213	5111	4913	6112	5864	6140	4396	4079	4251
gene:Zm00001d002328	0	1	0	0	0	0	0	0	0	0	1	0	0	0	0	1	0	0	0	0	0	1	1	0	0	0	0	1	0	1	1	0	2	0	0	0
gene:Zm00001d002330	87	87	96	67	146	134	76	134	83	109	109	125	130	146	124	141	142	161	57	42	51	100	112	110	112	24	153	73	70	78	129	109	126	109	77	152
gene:Zm00001d002331	0	0	0	0	0	0	0	0	0	0	0	0	0	0	0	0	0	0	0	0	0	0	0	0	0	0	0	0	0	0	0	0	0	0	0	0
gene:Zm00001d002332	546	513	483	408	1048	1009	683	948	606	521	565	567	652	739	716	1198	1316	1146	549	538	568	1078	995	1110	955	227	1207	552	553	593	842	920	957	847	798	824
gene:Zm00001d002333	729	743	719	379	886	843	533	734	478	390	425	434	233	269	270	516	467	480	543	537	576	716	624	727	466	121	594	419	304	290	287	297	317	458	424	422
gene:Zm00001d002334	967	906	1035	967	2530	2294	708	1115	633	1584	1615	1518	1912	2161	2079	1070	1091	898	810	847	832	2500	2263	2532	1116	237	1308	1193	1656	1541	2168	2189	2519	1206	1199	1249
gene:Zm00001d002336	0	0	0	0	0	0	0	0	0	0	0	0	0	0	0	0	0	0	0	0	0	0	0	0	0	0	0	0	0	0	0	0	0	0	0	0
gene:Zm00001d002338	61	68	68	16	53	48	17	21	10	73	69	84	33	31	35	25	36	20	67	74	59	37	47	41	19	4	37	59	52	72	34	33	51	19	20	37
gene:Zm00001d002339	1023	930	1054	401	1036	980	492	638	439	810	753	796	821	1070	1028	728	749	643	726	669	791	888	744	842	588	123	740	666	652	719	865	787	989	604	602	510
gene:Zm00001d002340	192	200	224	115	280	253	86	103	57	258	257	280	242	260	222	79	78	83	247	232	290	291	288	321	143	28	185	306	317	312	296	227	331	137	114	116
gene:Zm00001d002341	676	687	618	330	785	764	493	698	478	685	647	669	604	671	642	631	638	569	639	666	698	747	629	717	893	207	1291	542	452	441	659	631	666	851	757	681
gene:Zm00001d002342	3	3	6	0	2	4	0	2	0	4	6	3	5	5	2	2	2	0	1	1	1	5	7	4	7	1	6	4	6	5	5	9	13	4	5	3
gene:Zm00001d002343	20	22	12	28	62	71	5	8	7	80	69	98	88	104	86	25	20	17	34	31	17	31	25	40	6	2	14	16	19	12	83	87	71	16	15	15
gene:Zm00001d002344	144	137	134	76	182	186	66	94	53	235	240	230	169	221	161	131	91	77	176	175	204	222	207	213	138	26	223	200	191	183	199	242	245	140	138	127
gene:Zm00001d002345	22	20	27	22	59	46	9	9	3	34	31	44	75	76	59	10	8	8	31	10	24	63	63	68	15	6	21	32	30	24	61	80	83	24	11	14
gene:Zm00001d002346	29	26	31	13	28	49	3	9	3	39	49	36	59	58	44	20	25	22	23	28	27	107	82	99	17	3	16	34	61	57	107	114	99	21	19	24
gene:Zm00001d002347	1848	1843	1959	562	1210	1172	265	352	267	1835	1991	1903	1579	1734	1881	732	794	611	626	676	803	1910	1569	1917	210	75	248	630	577	561	1211	1153	1399	278	231	203
gene:Zm00001d002348	0	1	3	0	0	0	0	0	0	2	0	1	1	0	2	0	0	1	1	0	1	1	2	0	0	0	0	1	0	0	5	2	2	2	0	0
gene:Zm00001d002349	261	242	290	129	368	272	125	163	91	286	263	287	268	355	297	175	163	147	184	171	148	190	193	199	178	44	206	173	174	177	223	230	233	180	142	203
gene:Zm00001d002350	8654	8287	8564	142	361	351	201	312	197	8595	8474	8909	670	714	656	624	715	598	8625	8141	8539	459	443	473	181	52	290	6527	4097	4322	749	732	767	488	470	475
gene:Zm00001d002351	4047	4013	4187	551	1486	1398	1782	2754	1549	3558	3411	3580	1568	1894	1685	2714	2620	2508	1656	1651	1787	772	686	778	848	215	1329	1361	1194	1223	747	751	836	1516	1293	1531
gene:Zm00001d002352	59	50	58	31	79	73	18	40	26	68	62	63	77	70	81	30	41	33	77	83	73	89	93	91	72	10	146	86	56	74	75	84	97	71	41	48
gene:Zm00001d002353	550	482	606	250	460	444	197	276	155	367	386	393	410	471	467	258	275	216	454	454	485	578	471	526	385	113	394	434	385	347	522	536	586	388	325	400
gene:Zm00001d002356	161	144	174	64	139	132	56	96	53	89	85	92	138	167	140	128	120	125	80	72	74	116	110	113	100	15	84	69	89	92	115	123	124	80	64	64
gene:Zm00001d002357	100	94	104	62	134	129	77	95	71	124	114	117	142	119	111	122	121	105	130	131	132	182	186	157	215	41	184	166	184	149	150	148	192	141	128	185
gene:Zm00001d002358	7348	7191	7361	2366	5653	5239	2818	4320	2617	4768	4401	4676	4068	4933	4543	3804	3820	3430	3128	2875	3303	4399	4076	4549	3940	917	5184	3234	3492	3448	4190	4262	4792	3482	3168	3314
gene:Zm00001d002359	338	349	339	253	738	627	316	531	283	553	491	587	667	771	654	482	518	502	322	313	376	701	661	700	648	178	840	465	737	716	758	695	815	596	614	758
gene:Zm00001d002360	0	0	1	0	0	0	0	0	0	0	0	1	0	0	0	1	0	0	1	0	1	0	0	0	0	0	0	1	2	0	1	0	1	0	0	1
gene:Zm00001d002361	0	0	0	0	0	0	0	0	0	0	0	0	0	0	0	0	0	0	0	0	0	0	0	0	0	0	0	0	0	0	0	0	0	0	0	0
gene:Zm00001d002362	1331	1252	1309	750	1780	1564	846	1317	792	1356	1264	1304	1324	1443	1437	1374	1447	1263	1267	1197	1299	1698	1497	1684	692	189	912	1239	1374	1324	1542	1551	1715	1455	1258	1342
gene:Zm00001d002364	44	44	59	2	5	4	7	10	8	45	60	56	9	11	17	36	30	27	90	81	124	25	17	20	11	5	15	94	74	76	25	21	26	17	14	15
gene:Zm00001d002365	0	0	0	0	0	0	0	0	0	0	0	0	0	0	0	0	0	0	0	0	0	0	0	0	0	0	0	0	0	0	0	0	0	0	0	0
gene:Zm00001d002366	2507	2467	2563	602	1626	1436	998	1410	855	2289	2170	2274	1420	1735	1503	1674	1805	1681	2485	2393	2617	1585	1424	1565	1982	500	2872	2526	2395	2475	1873	1685	1859	1673	1494	1817
gene:Zm00001d002367	0	1	0	0	0	0	0	2	0	0	0	0	2	0	1	0	1	0	0	0	0	0	0	2	0	0	0	0	0	0	0	0	0	0	0	1
gene:Zm00001d002369	259	249	283	22	66	45	46	60	45	156	146	154	65	82	79	140	136	121	362	293	353	111	100	121	118	38	171	243	169	166	138	145	148	120	120	88
gene:Zm00001d002370	0	0	0	0	0	0	0	0	0	0	0	0	0	0	0	0	0	0	0	0	0	1	0	0	0	0	0	0	0	0	0	0	0	0	0	0
gene:Zm00001d002371	955	939	953	403	905	899	690	969	588	800	824	889	787	854	880	1119	1175	1020	920	901	1003	884	812	902	1043	207	1323	966	919	940	999	974	1094	1037	999	969
gene:Zm00001d002372	58	64	65	19	84	59	75	107	68	67	63	60	41	56	62	161	159	171	92	105	89	45	51	59	270	59	329	86	83	77	119	81	111	241	244	267
gene:Zm00001d002373	692	639	745	452	1068	1056	413	595	308	708	686	767	934	1119	1047	672	726	623	612	502	581	968	938	1064	592	155	840	631	668	686	1153	1046	1068	748	731	724
gene:Zm00001d002374	0	0	0	0	2	0	0	0	1	0	0	2	0	1	1	3	0	0	1	0	0	2	0	3	1	0	4	0	0	0	0	1	0	0	3	1
gene:Zm00001d002375	0	0	0	0	0	0	0	0	0	0	0	0	0	0	0	0	0	0	0	0	0	0	0	0	0	0	0	0	0	0	0	0	0	0	0	0
gene:Zm00001d002377	171	172	165	254	603	522	475	764	445	235	212	204	584	678	582	682	759	659	229	279	277	667	563	641	681	182	895	320	320	380	674	619	737	632	592	823
gene:Zm00001d002378	0	0	0	1	0	1	1	0	0	1	3	1	3	0	1	0	0	0	0	0	1	0	0	0	0	0	1	1	1	1	1	1	0	1	0	0
gene:Zm00001d002379	0	0	0	0	1	0	0	0	0	0	0	0	0	0	0	0	0	0	0	0	0	0	0	0	0	0	0	0	0	0	0	0	0	0	0	0
gene:Zm00001d002380	0	0	0	0	0	0	0	0	1	0	0	0	0	0	0	0	0	0	0	0	0	0	0	0	0	0	0	0	0	0	0	0	0	0	0	0
gene:Zm00001d002381	0	0	0	0	0	0	0	0	0	0	0	0	0	0	0	0	0	0	0	0	0	0	0	0	0	0	0	0	0	0	0	0	0	0	0	0
gene:Zm00001d002382	137	117	147	76	227	202	85	165	81	177	168	181	198	238	216	201	213	174	151	151	145	265	227	244	245	45	371	168	202	202	254	238	288	187	201	163
gene:Zm00001d002383	2	2	1	0	4	1	0	1	1	1	0	4	2	2	3	1	3	0	0	1	2	2	0	0	1	0	2	5	0	0	2	2	2	0	1	2
gene:Zm00001d002384	1921	2002	2168	538	1315	1220	1682	2230	1373	1605	1595	1508	887	1028	946	2151	2137	2068	1765	1809	1925	1253	1131	1233	2663	631	3375	1664	1574	1552	1040	986	1178	2012	1729	1664
gene:Zm00001d002385	40	45	54	32	90	64	25	36	21	58	51	65	77	76	67	41	43	61	60	61	59	99	90	111	67	8	95	69	78	77	109	107	111	56	75	78
gene:Zm00001d002386	421	457	438	219	496	472	300	413	269	472	420	428	509	541	539	524	529	512	401	370	407	525	488	542	504	112	738	399	452	493	558	569	636	532	529	498
gene:Zm00001d002387	86	99	90	69	169	143	69	82	52	105	96	96	115	159	145	80	79	102	109	101	114	163	156	178	135	39	141	111	102	134	146	146	167	118	91	97
gene:Zm00001d002388	622	647	606	437	1172	1043	683	1005	636	963	898	890	1171	1329	1249	1101	1091	1050	683	664	714	1244	1096	1351	1319	259	1909	819	847	917	1392	1312	1430	1224	1184	1208
gene:Zm00001d002390	560	582	595	507	1211	1123	924	1379	820	560	531	602	971	1296	1055	1375	1447	1362	794	758	756	1458	1363	1529	2151	529	3058	835	897	896	1393	1323	1547	1935	1604	2517
gene:Zm00001d002391	668	654	706	98	264	217	42	54	41	365	399	424	235	302	263	67	93	60	484	456	515	264	277	270	99	31	134	428	344	326	261	278	303	97	100	102
gene:Zm00001d002392	0	0	0	0	0	0	0	0	0	0	0	0	0	0	0	0	0	0	1	0	2	0	0	0	0	0	1	0	0	0	0	0	0	0	0	0
gene:Zm00001d002393	0	0	0	6	10	12	2	7	2	1	3	1	15	6	14	3	2	3	0	0	0	10	8	11	1	0	1	0	2	0	8	8	13	1	0	0
gene:Zm00001d002394	0	0	0	1	1	4	2	2	0	0	0	0	1	7	1	3	0	1	0	0	0	0	2	1	1	0	1	0	0	0	4	2	1	1	2	0
gene:Zm00001d002395	929	893	958	501	1284	1201	363	531	343	756	745	753	976	1143	1056	704	597	641	734	628	679	1014	940	1056	416	115	641	657	592	597	1019	1013	1015	498	465	456
gene:Zm00001d002396	1563	1513	1570	2201	5428	4927	1164	1903	1066	5157	4895	5207	4765	5369	5065	2544	2594	2484	1478	1396	1541	3352	3292	3422	1886	459	2254	2336	3584	3193	5154	4884	5541	2154	1983	2643
gene:Zm00001d002397	0	0	0	0	0	0	0	0	0	0	0	0	0	0	0	0	0	0	0	0	0	0	0	0	0	0	0	0	0	0	0	0	0	0	0	0
gene:Zm00001d002398	0	0	0	0	0	0	0	0	0	0	0	0	0	0	0	0	0	0	0	0	0	0	0	0	0	0	0	0	0	0	0	0	0	0	0	0
gene:Zm00001d002399	2	0	1	0	0	1	0	0	0	0	0	3	0	0	0	0	0	0	0	0	0	0	0	0	0	0	0	0	0	0	0	0	0	0	0	0
gene:Zm00001d002400	0	0	0	0	0	0	0	0	0	0	0	0	0	0	0	0	0	0	0	0	0	0	0	0	0	0	0	0	0	0	0	0	0	0	0	0
gene:Zm00001d002401	0	0	0	0	0	0	0	0	0	0	0	0	0	0	0	0	0	0	0	0	0	0	0	0	0	0	0	0	0	0	0	0	0	0	0	0
gene:Zm00001d002402	107	126	102	113	283	237	102	171	96	103	129	128	177	201	192	178	190	154	95	109	103	221	190	202	120	30	163	102	130	129	197	162	219	134	98	141
gene:Zm00001d002403	30	24	35	40	88	69	23	31	19	41	48	46	59	77	78	32	35	34	35	46	38	73	81	70	38	5	50	38	55	35	53	58	100	35	34	23
gene:Zm00001d002405	91	92	105	44	64	53	49	71	40	33	42	44	78	90	81	105	101	87	135	129	145	101	63	86	108	30	92	73	54	55	83	103	102	91	91	121
gene:Zm00001d002406	47	40	42	20	25	31	11	26	10	8	21	13	14	27	18	30	34	27	69	76	61	36	31	35	46	19	37	41	17	12	30	26	33	41	41	33
gene:Zm00001d002407	1	2	0	0	0	0	0	0	0	1	0	0	0	3	0	0	0	0	0	0	0	0	0	0	0	0	0	1	1	1	0	0	0	0	0	0
gene:Zm00001d002408	0	128	126	39	0	96	56	51	0	60	61	0	68	1	0	62	60	55	109	0	0	0	54	69	0	0	108	85	58	0	0	0	0	0	37	61
gene:Zm00001d002409	0	0	0	0	0	0	0	0	0	0	0	0	0	0	0	0	0	0	0	0	0	0	0	0	0	0	0	0	0	0	0	1	0	0	0	0
gene:Zm00001d002410	1267	1149	1248	3	12	5	2	1	0	38	36	41	16	12	23	40	26	24	299	312	361	9	4	14	2	2	5	171	29	29	29	30	35	18	14	23
gene:Zm00001d002411	0	0	0	0	0	0	0	0	0	0	0	0	0	0	0	0	0	0	0	2	0	0	0	2	0	0	0	0	0	0	0	1	1	1	1	0
gene:Zm00001d002412	1	2	2	1	0	1	2	2	1	0	0	0	0	0	1	1	1	0	1	1	0	1	0	0	0	0	2	0	2	0	0	0	2	2	1	2
gene:Zm00001d002413	0	0	0	0	0	0	0	0	0	0	0	0	0	0	0	0	0	0	0	0	0	0	0	0	0	0	0	0	0	0	0	0	0	0	0	0
gene:Zm00001d002414	1	0	1	1	1	0	2	0	2	0	0	4	1	1	1	0	3	2	1	1	4	1	1	2	0	0	3	0	0	0	1	0	1	0	0	1
gene:Zm00001d002415	403	430	450	128	284	236	160	220	148	149	135	151	307	387	305	230	292	232	319	326	392	356	348	396	332	112	514	260	146	146	386	395	457	350	314	361
gene:Zm00001d002416	2870	2728	2830	2066	5089	4586	6415	9616	5823	2535	2505	2687	4003	4731	4264	8493	8883	7957	3954	3832	4204	4333	3967	4280	9411	2467	13283	3282	2960	2934	4091	3982	4740	9153	8107	9555
gene:Zm00001d002418	1165	1088	1188	855	2109	1891	1157	1978	1111	1911	1841	1969	1574	2002	1770	1857	1998	1798	1320	1253	1353	2016	1949	1971	2103	553	2765	1726	2224	2287	2124	1994	2234	2420	2146	2830
gene:Zm00001d002419	124	127	133	79	147	122	90	120	82	126	117	121	139	174	159	146	157	142	153	115	168	155	154	185	184	32	195	122	126	133	183	147	181	169	133	123
gene:Zm00001d002420	25	22	40	10	30	23	27	33	20	27	23	31	27	40	27	29	30	32	39	30	46	39	24	44	54	8	40	36	22	35	43	41	59	41	38	34
gene:Zm00001d002421	48	55	59	87	216	208	41	64	37	86	76	78	151	185	151	87	86	49	126	89	115	178	180	171	49	11	68	99	118	105	234	185	197	65	68	52
gene:Zm00001d002422	395	404	390	0	3	3	2	1	2	132	148	154	19	3	11	1	1	3	33	33	33	4	1	5	3	1	7	31	19	26	18	9	13	4	3	4
gene:Zm00001d002423	959	963	1078	176	455	416	227	348	217	584	580	581	336	325	315	224	240	214	809	796	827	319	304	354	655	169	749	615	601	508	414	375	430	431	399	486
gene:Zm00001d002424	20	18	19	10	23	13	4	8	4	21	26	17	26	27	23	5	10	12	26	27	29	22	25	28	23	3	27	29	32	43	36	29	39	23	19	17
gene:Zm00001d002425	29	43	23	13	30	29	12	26	11	92	82	73	30	48	26	23	24	16	30	42	33	27	27	29	45	13	30	71	112	113	44	41	35	28	39	23
gene:Zm00001d002426	20456	19560	20192	3884	9600	8753	6255	8828	5400	14644	14312	14448	8058	9259	8672	9273	9074	8631	12546	11928	12871	9094	8244	9300	8750	2175	11116	13319	13451	13581	9729	9686	10542	8952	8518	9519
gene:Zm00001d002427	0	0	0	0	0	0	0	0	0	0	0	0	0	0	0	0	0	0	0	0	0	0	0	0	0	0	0	0	0	0	0	0	0	0	0	0
gene:Zm00001d002428	467	489	512	76	188	155	869	1232	720	266	240	263	90	146	109	1189	1246	1191	415	400	466	193	157	163	1770	517	1885	320	249	269	163	158	185	1410	1265	1420
gene:Zm00001d002429	99	76	79	66	136	159	51	72	52	330	291	270	137	187	168	76	86	63	76	48	73	188	165	175	142	35	136	253	439	430	274	250	333	111	107	120
gene:Zm00001d002430	0	0	0	0	0	0	0	0	0	0	0	1	0	0	0	0	0	0	0	0	0	0	0	0	0	0	1	0	1	1	1	0	0	0	0	1
gene:Zm00001d002431	0	0	0	0	1	0	0	0	0	7	8	7	2	3	1	0	0	0	0	2	1	1	0	0	1	1	1	2	5	9	2	0	1	1	0	2
gene:Zm00001d002432	1	0	0	0	0	0	0	0	0	0	1	0	0	4	1	0	1	1	0	0	0	0	1	0	0	0	1	0	1	2	3	1	3	2	1	0
gene:Zm00001d002433	255	247	279	164	445	405	265	326	201	338	354	345	390	433	407	449	448	412	181	189	243	464	445	533	515	117	594	247	284	347	477	503	521	422	438	395
gene:Zm00001d002434	3	0	1	0	4	2	5	1	5	3	6	7	2	10	5	12	6	11	15	21	18	29	27	31	5	3	6	17	23	16	41	36	49	35	42	34
gene:Zm00001d002435	1	0	0	0	0	0	0	0	0	1	0	0	1	0	0	2	0	0	0	0	0	0	0	2	0	0	0	0	1	2	5	2	3	0	0	1
gene:Zm00001d002436	6	8	8	3	10	7	8	6	2	14	21	18	12	10	11	23	21	17	80	84	91	56	46	48	19	3	23	64	43	39	78	53	72	98	119	87
gene:Zm00001d002437	0	0	0	0	0	0	1	2	0	1	0	2	1	0	0	0	0	0	2	0	0	5	3	2	2	1	4	0	0	0	0	0	2	0	0	2
gene:Zm00001d002439	108	129	127	8	27	16	23	30	14	20	23	22	14	12	18	31	42	39	104	121	107	18	21	20	43	9	64	84	30	27	17	15	21	29	15	30
gene:Zm00001d002440	805	862	848	310	793	723	363	568	321	706	691	733	768	885	813	645	618	558	628	642	710	625	623	623	529	125	748	593	632	625	779	708	829	528	477	502
gene:Zm00001d002441	30	26	31	6	16	13	8	6	6	11	7	17	6	9	9	3	8	5	14	14	24	13	22	26	12	3	20	20	19	9	15	15	8	13	4	12
gene:Zm00001d002444	50	44	54	33	89	71	24	39	36	46	41	57	55	79	58	33	35	34	43	55	63	70	59	86	69	18	75	60	68	65	90	82	81	37	48	56
gene:Zm00001d002446	592	556	605	633	1418	1286	342	535	278	785	730	766	1249	1461	1308	751	714	686	726	693	801	1208	1155	1233	738	188	1065	637	531	587	1539	1443	1641	748	626	619
gene:Zm00001d002447	43	52	39	39	64	54	36	55	30	49	67	60	40	45	38	90	85	80	170	137	171	124	129	138	177	47	254	123	110	100	146	112	123	139	132	166
gene:Zm00001d002448	1	0	0	0	0	0	0	0	0	0	0	0	0	0	0	0	0	0	6	10	8	8	10	10	20	7	40	4	5	7	10	11	13	7	3	14
gene:Zm00001d002449	0	0	0	0	0	0	0	0	0	0	0	0	0	0	0	0	0	0	0	0	0	0	0	0	0	0	0	0	0	0	0	0	0	0	0	0
gene:Zm00001d002450	171	172	175	71	202	164	69	111	54	166	163	143	173	192	176	124	110	104	166	150	192	196	191	202	179	43	240	147	155	152	200	209	242	113	121	128
gene:Zm00001d002451	293	300	333	208	464	441	98	132	78	189	177	232	350	407	355	186	194	170	349	340	389	893	698	911	345	87	401	344	406	400	738	755	896	368	287	333
gene:Zm00001d002452	0	0	0	0	0	0	0	0	0	0	0	0	0	0	0	0	0	0	0	0	0	0	0	0	0	0	0	0	0	0	0	0	0	0	0	0
gene:Zm00001d002454	941	893	989	1098	2739	2393	2243	3051	1811	958	980	1001	1747	2119	2029	2896	2939	2762	891	855	845	2642	2338	2659	2893	782	2864	862	978	907	2406	2273	2585	2930	2554	2997
gene:Zm00001d002455	116	120	167	187	432	362	177	254	158	159	160	154	415	549	475	320	379	342	166	194	228	334	331	369	457	116	609	177	171	161	418	342	446	344	296	351
gene:Zm00001d002456	367	332	352	141	378	342	152	236	183	341	299	351	393	440	395	343	317	329	503	480	514	530	529	557	462	100	617	423	399	433	658	614	696	448	416	476
gene:Zm00001d002457	38	49	49	11	30	31	11	12	12	55	49	64	18	44	28	20	27	24	41	43	35	33	35	40	28	7	49	54	60	56	39	37	51	22	23	34
gene:Zm00001d002458	174	131	147	135	408	354	245	324	217	226	225	226	316	394	348	338	331	278	135	129	143	312	326	355	402	103	699	158	222	189	360	320	371	328	273	318
gene:Zm00001d002461	0	0	0	0	0	0	0	0	0	1	0	0	1	0	0	0	0	0	0	1	0	0	0	0	0	0	0	1	1	0	0	0	0	0	0	0
gene:Zm00001d002462	580	564	582	535	1412	1134	872	1363	856	681	619	704	1040	1389	1109	1262	1452	1302	601	648	693	1291	1247	1287	1293	328	1625	704	846	745	1239	1096	1333	1442	1152	1822
gene:Zm00001d002463	0	0	0	0	0	0	0	0	0	0	0	0	0	0	0	0	0	0	0	0	0	0	0	0	0	0	0	0	0	0	0	0	0	0	0	0
gene:Zm00001d002465	0	0	0	0	0	0	0	0	0	0	0	0	0	0	0	0	0	0	0	0	0	0	0	0	0	0	0	0	0	0	0	0	0	0	0	0
gene:Zm00001d002467	0	0	0	0	0	0	0	0	0	0	0	1	0	0	0	0	0	0	0	0	0	0	0	0	0	0	0	0	0	0	0	0	0	0	0	0
gene:Zm00001d002468	0	0	0	0	0	0	0	0	0	0	0	0	0	0	0	1	0	0	0	0	0	0	0	0	1	0	0	0	2	0	0	0	0	0	0	0
gene:Zm00001d002469	0	0	0	0	0	0	0	0	0	0	0	0	0	0	0	0	0	0	0	0	0	0	0	0	0	0	0	0	0	0	0	0	0	0	0	0
gene:Zm00001d002470	0	0	0	0	0	0	1	0	1	0	0	0	1	0	2	2	0	0	0	0	1	0	0	1	0	0	0	0	0	0	0	0	0	1	0	0
gene:Zm00001d002471	0	0	0	0	0	0	0	1	0	0	0	0	0	0	0	0	0	0	0	0	0	0	0	0	0	0	0	0	0	0	0	0	0	0	0	0
gene:Zm00001d002472	0	0	0	0	0	0	0	0	0	0	0	0	0	0	0	0	0	0	0	0	0	0	0	0	0	0	0	0	0	0	0	0	0	0	0	0
gene:Zm00001d002473	0	0	0	2	2	4	2	1	0	0	1	1	3	2	0	6	3	2	1	0	0	6	6	2	6	1	5	0	1	0	1	0	6	1	2	1
gene:Zm00001d002474	0	0	0	0	2	0	0	3	0	1	0	0	0	0	0	0	3	0	0	0	0	1	0	0	0	0	0	0	0	0	1	0	1	2	1	0
gene:Zm00001d002475	65	67	64	51	134	121	76	109	53	57	66	57	110	135	113	192	177	160	63	62	68	177	201	197	168	40	247	81	88	87	195	176	211	131	141	128
gene:Zm00001d002476	1	3	1	0	0	2	0	1	1	2	1	0	0	1	2	0	3	2	5	1	4	0	2	4	7	0	3	0	0	0	5	5	1	2	3	4
gene:Zm00001d002477	0	2	0	0	0	0	0	0	0	0	1	0	2	0	1	0	0	1	0	0	1	0	1	0	0	0	1	0	0	0	1	3	1	0	0	0
gene:Zm00001d002478	295	317	322	223	582	521	374	543	301	411	417	401	507	571	528	641	615	558	322	311	320	548	560	617	669	142	943	395	423	439	694	642	707	674	590	679
gene:Zm00001d002479	0	0	0	0	2	0	0	0	0	0	0	1	0	0	0	1	1	0	0	1	0	5	4	1	1	0	1	0	0	0	2	7	4	0	1	0
gene:Zm00001d002480	0	0	0	0	0	0	0	0	0	0	0	0	0	0	0	0	0	0	0	0	0	0	0	0	0	0	0	0	2	0	0	0	0	0	0	0
gene:Zm00001d002481	66	60	56	21	48	49	33	55	30	57	54	50	66	70	45	59	72	59	46	31	46	77	73	70	82	13	96	49	51	45	65	56	57	44	54	80
gene:Zm00001d002482	0	0	0	0	0	0	0	0	0	0	0	0	0	0	0	0	0	0	0	0	0	0	0	0	0	0	0	0	0	0	0	0	0	0	0	0
gene:Zm00001d002483	32	25	18	32	72	69	10	12	5	41	61	40	62	62	65	24	23	23	27	21	23	74	64	62	33	5	47	32	33	34	86	102	91	19	15	27
gene:Zm00001d002485	376	368	407	49	135	115	101	123	82	132	123	99	121	126	116	163	166	154	359	318	346	92	119	125	237	51	441	233	115	126	157	162	158	261	262	264
gene:Zm00001d002488	2	0	0	0	0	0	0	0	0	0	0	1	0	0	0	1	1	0	0	0	0	1	1	1	0	0	0	0	0	0	1	0	2	0	0	0
gene:Zm00001d002489	957	885	920	669	1451	1298	1170	1569	999	2104	2181	2207	1340	1556	1408	1663	1767	1636	1256	1154	1319	1286	1270	1324	1411	401	1769	1597	1977	1965	1540	1563	1781	1258	1157	1280
gene:Zm00001d002490	2467	2382	2488	2149	5466	5058	4434	6527	3975	3026	2805	2894	3612	4276	4110	5303	5165	4586	2642	2626	2708	5653	5219	5733	5880	1333	8741	3253	3984	3987	5147	5197	5694	5348	4878	4558
gene:Zm00001d002491	65	42	47	60	129	113	51	96	48	47	45	58	109	110	118	90	120	62	62	49	67	131	105	126	89	31	64	51	71	71	105	115	124	93	62	76
gene:Zm00001d002492	0	0	0	0	0	0	0	0	0	0	0	0	0	0	0	0	0	0	0	0	0	0	0	0	0	0	1	0	0	0	0	0	0	0	0	0
gene:Zm00001d002494	0	0	0	0	0	0	0	0	0	0	0	0	0	0	0	0	0	0	0	0	0	0	0	0	0	0	0	0	0	0	0	0	0	0	0	0
gene:Zm00001d002495	0	0	0	0	0	0	0	0	0	0	0	0	0	0	0	0	0	0	0	0	0	0	0	0	0	0	0	0	0	0	0	0	0	0	0	0
gene:Zm00001d002496	3	1	1	0	0	1	0	0	0	5	5	2	1	3	6	3	2	0	0	4	0	0	0	1	1	2	1	1	0	1	2	3	2	2	1	0
gene:Zm00001d002497	0	0	0	0	0	0	0	0	0	0	0	0	0	0	0	0	0	0	0	0	0	0	0	0	0	0	0	0	0	0	0	0	0	0	0	0
gene:Zm00001d002498	0	0	0	0	0	0	0	0	0	0	0	0	0	0	0	0	0	0	0	0	0	0	0	0	0	0	0	0	0	0	0	0	0	0	0	0
gene:Zm00001d002499	449	443	463	239	562	554	303	476	287	570	572	577	496	645	529	411	437	425	505	443	477	588	583	602	500	119	626	540	645	683	550	526	600	461	384	500
gene:Zm00001d002500	45	35	37	97	229	216	73	78	58	141	137	139	195	228	250	110	108	82	48	67	64	354	307	348	143	45	182	157	232	219	357	380	409	152	161	137
gene:Zm00001d002501	357	373	427	196	409	428	167	220	146	434	396	425	319	350	327	268	292	242	460	422	422	381	353	390	321	77	290	427	498	483	415	404	381	272	229	233
gene:Zm00001d002503	5369	5275	5305	2240	5337	5100	4053	6336	3876	2762	2519	2760	3736	4194	4075	5132	5475	4807	6796	6113	6558	5115	5252	5108	6527	1489	9120	4133	1955	1784	5480	5010	5605	6349	5778	6664
gene:Zm00001d002504	226	223	236	181	457	401	248	370	203	263	241	249	377	467	409	385	382	338	253	213	239	378	352	396	411	128	570	239	284	276	406	381	467	370	285	409
gene:Zm00001d002505	0	0	0	0	0	0	0	0	0	0	0	0	1	0	0	0	0	0	0	0	0	0	0	0	0	0	0	0	0	0	0	0	1	0	0	0
gene:Zm00001d002506	0	0	0	0	0	0	0	0	0	0	0	0	0	0	0	0	0	1	25	14	23	31	28	33	23	7	39	19	25	27	35	31	34	14	11	12
gene:Zm00001d002507	0	0	0	0	0	0	0	0	0	0	0	0	0	0	0	0	0	0	0	0	0	0	0	0	0	0	0	0	0	0	0	0	0	0	0	0
gene:Zm00001d002508	0	0	0	0	0	0	0	0	0	0	0	0	0	0	0	0	0	0	0	0	0	0	0	0	0	0	0	0	0	0	0	0	0	0	0	0
gene:Zm00001d002509	0	0	0	0	0	0	0	0	0	0	0	0	0	0	0	0	0	0	0	0	0	0	0	0	0	0	0	0	0	0	0	0	0	0	0	0
gene:Zm00001d002510	1	2	3	0	1	0	0	0	2	3	2	0	0	2	2	0	1	0	0	0	3	1	1	0	0	1	0	3	1	0	2	1	3	0	0	0
gene:Zm00001d002511	399	404	369	406	1001	900	417	669	351	591	588	636	761	894	791	639	649	554	509	510	594	955	792	929	548	151	828	554	714	666	960	1002	1050	704	596	756
gene:Zm00001d002512	8	10	12	23	55	41	26	45	25	16	19	21	35	47	54	47	62	47	7	12	9	47	48	43	31	11	37	11	16	15	45	48	46	45	35	39
gene:Zm00001d002514	125	118	157	93	225	204	141	175	100	68	58	75	167	240	252	136	148	116	211	201	231	393	337	422	219	60	264	218	197	179	349	348	402	172	141	178
gene:Zm00001d002515	0	0	1	0	1	1	2	4	2	1	0	0	1	4	2	4	2	4	0	1	0	1	1	2	0	0	0	1	0	0	0	3	1	0	0	0
gene:Zm00001d002517	0	0	0	0	0	0	0	0	0	0	0	0	0	0	0	0	0	0	0	0	0	0	0	0	0	0	0	0	0	0	0	0	0	0	0	0
gene:Zm00001d002519	1	0	2	1	1	0	2	3	0	0	0	0	1	2	0	0	2	0	1	0	2	1	2	1	4	0	2	0	1	0	1	0	1	1	0	2
gene:Zm00001d002520	107	82	96	127	304	267	263	369	235	71	68	68	162	210	172	409	390	377	144	130	147	389	353	386	469	145	401	161	193	154	353	360	378	459	432	404
gene:Zm00001d002521	20	7	16	4	6	10	20	18	20	4	3	5	3	2	1	30	36	30	10	8	19	10	12	15	25	12	32	19	12	13	11	12	14	22	24	20
gene:Zm00001d002522	48	46	38	5	15	6	12	9	4	16	14	4	2	5	6	8	7	7	52	59	69	8	13	13	14	6	11	37	26	22	10	8	3	16	8	6
gene:Zm00001d002523	317	288	320	21	54	37	37	45	23	22	29	33	48	61	56	76	60	73	69	78	84	49	63	51	177	43	195	46	20	30	72	81	73	131	98	105
gene:Zm00001d002524	0	0	0	0	0	0	0	0	0	0	0	0	0	0	0	0	0	0	0	0	0	0	0	0	0	0	0	0	0	0	0	0	0	0	0	0
gene:Zm00001d002530	6	11	6	6	6	7	0	1	0	5	5	3	4	4	1	1	4	5	4	4	7	4	2	9	12	4	12	6	8	3	6	3	2	2	6	6
gene:Zm00001d002531	4	0	1	1	0	1	1	0	0	0	1	2	0	0	0	0	2	0	0	0	2	2	0	0	3	1	0	1	0	1	0	1	0	2	2	4
gene:Zm00001d002532	1390	1317	1397	32	66	62	1116	1650	981	369	396	394	45	52	55	1666	1775	1638	1651	1570	1670	54	55	67	2169	605	2061	1080	446	437	64	76	63	2227	1943	2246
gene:Zm00001d002533	0	0	1	0	0	0	0	0	0	1	2	2	0	0	0	0	0	0	0	2	0	0	0	0	0	1	0	0	1	1	0	0	0	0	0	0
gene:Zm00001d002534	7	8	6	5	18	12	7	5	4	18	22	10	19	16	18	7	5	3	5	5	6	5	8	12	7	4	13	5	9	10	27	23	24	14	11	5
gene:Zm00001d002535	39	49	36	94	192	200	35	49	31	109	99	90	126	154	182	32	33	23	1	7	7	45	32	34	1	4	5	13	11	11	61	53	65	3	0	3
gene:Zm00001d002536	0	0	2	0	2	0	1	1	1	1	3	4	7	3	2	1	2	3	0	1	1	2	2	0	0	0	0	2	0	1	1	1	3	1	1	2
gene:Zm00001d002537	93	106	92	93	207	213	48	87	64	144	141	128	173	196	177	85	77	78	96	92	102	167	163	200	94	22	124	109	162	129	164	179	174	75	59	83
gene:Zm00001d002538	189	176	211	172	491	503	265	404	218	473	425	471	448	576	562	585	599	568	173	165	150	399	348	420	446	90	620	251	301	289	471	436	472	372	346	312
gene:Zm00001d002539	8	6	4	34	59	67	13	8	4	17	13	16	62	74	47	25	22	20	13	22	30	66	42	84	37	3	31	31	57	45	88	82	97	15	16	30
gene:Zm00001d002540	414	457	500	738	1851	1672	987	1567	935	730	701	741	1839	2180	2007	2580	2578	2426	458	492	505	2430	2294	2500	1366	307	1787	628	706	719	3262	3330	3653	1435	1296	1225
gene:Zm00001d002541	1	3	0	0	5	5	1	0	0	1	0	1	0	3	3	2	2	1	0	1	1	3	2	4	3	0	1	1	2	1	6	4	6	4	1	7
gene:Zm00001d002542	172	170	170	207	539	525	699	926	533	195	197	188	672	690	638	816	853	727	277	267	292	730	734	719	915	225	1165	304	301	312	742	783	863	845	789	796
gene:Zm00001d002543	3	2	5	0	2	0	0	0	0	2	2	0	1	0	2	0	0	0	2	4	1	5	4	3	2	0	3	2	2	0	1	3	2	1	2	2
gene:Zm00001d002544	10	4	12	11	19	19	12	15	16	11	12	11	25	21	27	20	18	18	1	2	3	23	12	25	15	1	14	4	3	2	23	24	26	15	3	25
gene:Zm00001d002545	5	3	4	812	1936	1797	1904	2727	1651	17	16	16	1370	1687	1557	2166	2235	1998	27	17	22	2262	2083	2354	3372	862	3569	21	30	34	2005	1753	2157	3177	2847	3165
gene:Zm00001d002546	5	7	8	0	3	3	6	7	1	1	5	2	7	3	1	13	13	17	1	1	0	3	2	0	2	0	4	1	2	0	3	3	2	1	2	3
gene:Zm00001d002547	0	0	0	0	0	0	1	1	0	0	0	0	0	0	0	1	0	1	0	0	0	0	0	0	0	0	0	0	0	0	0	0	0	0	0	0
gene:Zm00001d002548	30	24	41	2	7	8	16	46	21	63	52	46	11	20	18	55	47	58	33	31	43	23	29	28	109	20	144	48	46	48	30	27	24	83	74	70
gene:Zm00001d002549	742	600	673	846	1771	1591	1886	2856	1703	1497	1560	1468	1297	1528	1530	2577	2441	2356	587	559	693	1318	1139	1296	1794	527	1688	920	1253	1225	1360	1479	1616	2254	1982	1918
gene:Zm00001d002550	2263	2128	2441	35	86	73	1218	1821	1076	950	1017	971	73	84	87	1897	1881	1760	3380	3050	3210	100	84	111	1362	349	1381	2474	1851	1743	168	171	194	1883	1635	1627
gene:Zm00001d002551	2	0	1	0	0	0	0	0	0	1	1	0	0	0	0	0	0	0	1	0	0	2	0	1	0	0	0	0	1	0	0	1	0	1	1	1
gene:Zm00001d002553	52	34	31	8	24	23	10	6	2	56	43	51	19	21	20	26	21	25	14	10	13	1	13	5	10	3	3	20	15	10	10	9	10	6	7	11
gene:Zm00001d002554	4	3	8	3	3	2	1	0	0	5	7	5	4	5	10	3	0	1	0	0	0	0	0	0	6	0	0	0	0	2	0	0	0	0	0	1
gene:Zm00001d002555	0	0	0	0	0	0	0	0	0	0	0	0	2	0	0	0	0	0	1	0	2	4	0	2	0	0	0	0	1	2	4	2	3	1	1	1
gene:Zm00001d002556	0	0	0	0	0	0	0	0	0	0	0	0	0	0	0	0	0	0	0	0	1	0	0	0	0	0	0	0	0	0	0	0	1	0	0	1
gene:Zm00001d002557	0	0	0	0	0	0	1	0	0	0	0	0	0	0	0	0	2	2	0	0	0	0	0	0	3	0	1	0	0	0	0	0	0	0	0	1
gene:Zm00001d002558	0	0	0	2	2	2	73	131	67	0	1	1	2	2	4	224	251	210	0	0	1	11	3	4	81	16	80	0	2	1	7	5	8	135	120	117
gene:Zm00001d002560	13	13	24	5	34	24	20	21	12	17	12	17	23	28	26	12	15	10	9	12	22	26	21	22	26	11	31	20	20	19	32	27	20	20	16	16
gene:Zm00001d002562	19	17	30	11	20	20	10	14	8	12	11	10	22	19	27	27	38	22	17	11	15	16	19	18	18	6	18	11	11	8	22	24	21	28	17	26
gene:Zm00001d002564	52	52	55	0	0	3	1	1	1	23	24	39	6	6	9	3	1	0	87	94	99	7	12	12	3	1	2	57	1	5	39	33	45	48	26	36
gene:Zm00001d002565	62	45	65	11	9	10	3	4	5	26	23	20	10	17	15	18	15	25	46	32	45	2	5	3	16	9	17	36	12	8	15	11	12	17	20	14
gene:Zm00001d002566	0	0	0	0	0	0	0	1	0	0	0	0	0	0	0	0	0	0	0	0	0	0	0	0	0	0	0	0	0	0	0	0	0	0	0	0
gene:Zm00001d002567	0	0	0	0	0	0	0	0	0	1	0	0	0	0	0	0	0	1	0	0	0	1	0	0	0	0	0	0	0	0	1	0	0	0	0	0
gene:Zm00001d002568	7	3	3	0	0	1	1	0	0	0	2	1	0	2	0	1	0	2	0	1	3	0	0	0	1	3	0	1	2	2	2	3	2	2	2	1
gene:Zm00001d002569	1	0	0	0	0	0	0	0	0	0	0	0	0	0	0	0	0	0	0	0	1	0	0	0	0	0	0	0	0	0	0	0	0	0	0	0
gene:Zm00001d002570	0	1	0	0	0	0	0	0	0	0	0	0	0	0	0	0	0	0	1	1	1	0	0	0	0	0	0	0	0	0	0	0	0	0	0	0
gene:Zm00001d002571	0	0	0	0	0	0	0	0	0	0	0	0	0	0	0	0	0	0	0	0	0	0	0	0	0	0	0	0	0	0	0	0	0	0	0	0
gene:Zm00001d002572	9	5	8	8	9	9	1	0	0	12	13	11	10	12	13	4	1	1	14	7	16	7	7	2	2	0	12	12	14	12	14	12	16	1	6	4
gene:Zm00001d002573	235	199	219	60	104	86	67	100	67	24	35	39	66	88	90	97	84	88	115	83	113	82	63	95	52	20	51	53	33	35	71	75	97	83	67	54
gene:Zm00001d002576	37	30	33	42	97	84	29	50	36	29	41	43	88	78	98	67	70	56	31	37	27	123	97	106	65	12	46	33	27	24	97	115	99	78	77	56
gene:Zm00001d002577	0	0	0	7	4	8	10	3	2	0	3	4	6	5	4	5	5	7	0	0	0	5	0	0	1	0	1	1	0	2	0	0	0	0	0	0
gene:Zm00001d002579	14	16	18	8	24	18	6	11	5	14	15	7	21	23	17	14	16	11	17	20	15	30	26	31	21	7	15	16	19	16	30	38	36	20	12	19
gene:Zm00001d002580	267	278	295	203	493	496	338	457	277	279	293	289	403	457	396	516	572	534	236	221	230	385	381	416	403	76	595	240	252	238	401	370	412	429	428	447
gene:Zm00001d002582	0	0	0	0	0	0	0	0	0	0	0	0	0	0	0	0	0	0	0	0	0	0	0	0	0	0	0	0	0	0	0	0	0	0	0	0
gene:Zm00001d002583	0	0	0	0	0	0	0	0	0	0	0	0	0	0	0	0	0	0	0	0	0	0	0	0	0	0	0	0	0	0	0	0	0	0	0	0
gene:Zm00001d002584	3	8	8	37	64	59	37	40	20	12	11	13	59	82	47	45	51	41	25	19	21	19	19	23	5	1	11	19	18	15	22	26	22	5	5	6
gene:Zm00001d002585	602	644	685	353	920	791	355	500	313	428	477	407	621	754	702	540	500	482	646	578	630	771	759	825	723	183	930	577	468	445	897	768	899	810	818	924
gene:Zm00001d002587	0	0	0	0	0	0	0	0	0	0	0	0	0	0	0	0	0	0	0	0	0	0	0	0	0	0	0	0	0	0	0	0	0	0	0	0
gene:Zm00001d002589	246	252	282	22	51	52	332	499	317	70	81	59	71	65	68	654	704	638	230	237	265	24	18	13	165	57	145	155	53	52	33	33	27	199	207	201
gene:Zm00001d002590	8	5	13	1	0	0	0	0	0	2	3	0	1	0	0	0	0	0	5	6	5	1	1	2	3	0	6	7	18	12	5	7	5	3	3	1
gene:Zm00001d002591	1645	1507	1634	220	500	540	462	660	451	1435	1376	1392	414	485	484	615	593	538	743	701	754	249	204	253	336	90	504	795	775	733	191	211	234	312	307	295
gene:Zm00001d002592	14	19	17	4	7	8	12	15	11	31	15	22	20	25	26	87	75	67	86	103	107	23	27	14	16	3	19	53	28	27	36	40	38	44	50	36
gene:Zm00001d002593	22	16	31	2	11	9	25	52	23	19	11	15	14	8	9	99	91	73	145	165	176	180	174	227	481	127	516	152	112	123	189	197	203	345	359	380
gene:Zm00001d002594	31	19	15	5	9	13	9	3	4	8	8	7	19	24	14	8	7	5	9	14	14	25	33	29	10	3	22	7	7	6	19	27	36	12	8	10
gene:Zm00001d002595	32	24	26	37	104	73	14	25	13	44	41	32	65	98	59	20	11	26	154	173	157	273	253	285	120	29	170	191	243	238	274	297	325	161	148	171
gene:Zm00001d002596	7	4	6	1	4	3	1	0	2	11	15	14	2	2	3	4	0	3	7	11	5	15	7	13	7	0	3	13	26	21	8	5	10	9	7	5
gene:Zm00001d002597	426	465	436	109	274	274	58	77	52	295	248	234	233	294	267	61	46	46	300	282	326	268	280	261	134	33	172	306	208	219	291	265	286	108	102	87
gene:Zm00001d002598	1429	1366	1420	549	1439	1369	701	1037	623	1401	1272	1383	1114	1235	1178	996	981	900	1996	1827	1845	1783	1645	1820	1681	365	2660	1820	1676	1645	1669	1635	1835	1761	1709	1866
gene:Zm00001d002599	0	0	0	0	0	0	0	0	0	0	0	0	0	0	0	0	0	0	0	0	3	4	8	2	3	1	3	3	3	3	3	7	11	1	6	2
gene:Zm00001d002600	172	175	182	193	470	392	202	364	213	164	122	156	315	460	401	241	328	253	193	210	214	574	543	528	409	81	555	196	235	227	479	433	506	409	388	514
gene:Zm00001d002601	571	569	648	692	1554	1409	703	939	675	1554	1656	1586	1221	1460	1475	1161	1189	1053	443	466	472	2763	2423	2777	1603	417	1690	945	1526	1546	2663	2651	2955	1305	1189	1144
gene:Zm00001d002602	131	117	108	121	258	257	108	175	90	119	94	96	182	195	146	156	163	151	102	116	100	305	292	332	196	48	233	126	137	141	242	242	245	254	180	199
gene:Zm00001d002603	499	455	513	256	665	591	390	612	364	538	569	496	556	666	610	530	562	474	452	453	461	718	647	737	705	173	965	556	661	674	642	649	733	661	586	727
gene:Zm00001d002606	0	1	0	0	2	0	0	0	0	1	1	0	0	1	1	0	0	0	0	0	0	0	0	0	0	0	0	0	0	0	0	0	0	0	0	0
gene:Zm00001d002607	0	0	0	0	0	0	0	0	0	0	0	0	0	0	0	0	0	0	0	0	0	0	0	0	0	0	0	0	0	0	0	0	0	0	0	0
gene:Zm00001d002608	0	0	0	0	0	0	0	0	0	0	0	0	0	0	0	0	0	0	0	0	0	0	0	0	0	0	0	0	0	0	0	0	0	0	0	0
gene:Zm00001d002609	0	0	0	1	1	1	1	0	0	2	2	0	0	2	3	1	1	0	1	1	0	0	0	1	2	0	0	2	0	1	0	0	0	0	0	0
gene:Zm00001d002610	76	63	75	8	16	13	3	7	5	18	14	16	12	21	13	37	34	37	64	46	69	20	8	8	89	34	86	31	2	4	10	21	19	110	77	105
gene:Zm00001d002611	587	597	605	471	1275	1173	518	856	492	544	531	596	933	1091	1013	773	732	759	728	755	747	1185	1175	1261	1057	245	1466	798	799	802	1377	1321	1469	1067	961	1064
gene:Zm00001d002612	0	0	0	0	0	0	0	0	0	0	0	0	0	0	0	0	0	0	0	0	0	0	0	0	0	0	0	0	0	0	0	0	0	0	0	0
gene:Zm00001d002613	0	4	1	0	1	1	1	5	1	3	2	1	0	0	0	3	2	3	1	0	3	3	1	5	3	1	2	0	1	2	1	3	2	0	1	4
gene:Zm00001d002614	19	22	16	8	25	45	19	30	8	11	17	14	39	48	56	46	62	47	82	76	107	46	45	53	94	26	87	79	42	50	81	58	68	189	185	209
gene:Zm00001d002615	290	278	278	196	491	411	233	376	209	417	374	376	417	489	452	426	432	421	451	392	453	594	549	639	592	125	869	383	370	387	658	685	706	525	514	610
gene:Zm00001d002616	8	6	9	20	35	43	14	28	5	8	0	5	20	32	19	13	17	12	11	8	8	33	35	35	19	2	17	7	6	5	43	35	35	21	20	15
gene:Zm00001d002617	1101	1133	1121	588	1486	1296	617	1087	552	1310	1144	1303	1315	1404	1374	1125	1201	1049	2460	2374	2468	3075	3068	3249	2866	690	3910	2823	3232	3168	3496	3256	3651	3156	2923	4137
gene:Zm00001d002618	21	12	17	0	1	0	0	0	0	12	6	12	0	0	1	2	2	5	14	16	21	0	0	0	0	0	0	31	18	17	0	1	2	0	0	0
gene:Zm00001d002620	5	7	6	0	0	0	0	0	0	0	0	0	0	0	0	0	0	0	0	0	0	0	0	0	0	0	0	0	0	0	0	0	0	0	0	0
gene:Zm00001d002621	52	47	59	43	84	85	55	66	33	62	58	66	87	143	81	144	131	118	64	72	60	118	118	115	96	42	155	70	59	76	129	122	134	90	89	103
gene:Zm00001d002623	154	142	172	23	61	47	34	38	26	16	19	17	77	85	98	112	133	112	86	75	69	75	69	71	33	8	22	47	27	21	64	89	79	35	32	25
gene:Zm00001d002624	197	192	184	722	1816	1578	1764	2605	1599	1608	1553	1706	1854	2338	1916	3116	3564	3157	124	122	155	1686	1605	1785	3103	831	3890	724	1265	1335	2091	1871	2376	2818	2494	3022
gene:Zm00001d002625	470	418	497	632	1522	1341	1231	1782	1132	370	345	332	1321	1454	1414	1675	1668	1629	262	304	290	1555	1407	1502	1741	428	2527	300	312	300	1352	1310	1499	1731	1499	1529
gene:Zm00001d002626	134	169	141	43	98	90	222	335	170	109	100	105	57	85	59	306	299	285	65	36	59	44	46	42	244	36	317	34	36	39	27	14	27	195	152	189
gene:Zm00001d002628	2	2	4	3	9	0	2	4	4	1	1	0	3	2	7	3	2	3	6	0	0	0	9	8	1	1	2	6	5	8	4	6	9	7	10	4
gene:Zm00001d002629	0	1	0	0	0	0	0	0	0	2	2	2	2	0	0	0	0	0	0	0	0	0	0	0	0	0	0	0	0	0	1	1	0	0	0	0
gene:Zm00001d002630	161	145	164	11	30	15	9	10	9	23	24	23	24	28	39	29	29	16	20	18	23	21	24	19	13	8	24	17	15	15	31	28	36	19	11	15
gene:Zm00001d002631	113	125	118	70	145	146	40	62	52	142	106	126	134	152	133	64	66	67	116	112	134	156	173	154	116	33	137	121	125	141	175	150	172	102	82	101
gene:Zm00001d002632	387	377	384	39	101	93	95	155	80	129	130	122	103	110	118	329	296	294	158	144	198	105	119	107	118	34	149	174	129	142	159	142	190	132	127	115
gene:Zm00001d002634	0	0	0	0	0	0	0	0	0	0	0	0	0	0	0	0	1	0	0	0	1	0	0	0	0	0	1	0	0	0	0	0	0	0	0	1
gene:Zm00001d002635	0	0	0	0	0	0	0	0	0	0	0	0	0	0	0	0	0	0	0	0	0	0	0	0	0	0	0	0	0	0	0	0	0	0	0	0
gene:Zm00001d002636	0	0	0	0	0	0	0	0	0	0	0	0	0	0	0	0	0	0	0	0	0	0	8	0	0	0	0	0	0	0	0	0	0	0	0	0
gene:Zm00001d002637	0	0	0	0	0	0	0	0	0	0	0	0	0	0	0	0	0	0	0	0	0	0	0	0	0	0	0	0	0	0	0	0	0	0	0	0
gene:Zm00001d002638	0	0	0	0	0	0	0	0	0	0	0	0	0	0	0	0	0	0	0	0	0	0	0	0	0	0	0	0	0	0	0	0	0	0	0	0
gene:Zm00001d002639	282	288	258	198	529	475	226	335	208	321	288	311	447	520	475	342	356	309	259	242	266	538	515	590	397	111	583	294	332	342	546	500	559	397	379	354
gene:Zm00001d002640	726	772	774	355	820	762	357	533	316	721	703	762	695	875	802	660	649	614	816	759	742	1142	1152	1180	953	191	1243	847	989	959	1151	1047	1271	783	724	1086
gene:Zm00001d002641	172	152	210	15	41	42	81	173	100	48	47	56	30	35	37	165	157	126	208	247	272	66	68	79	271	67	327	166	82	70	61	70	77	214	166	193
gene:Zm00001d002642	55	58	62	97	172	180	80	121	83	35	32	38	181	215	175	110	119	95	51	67	68	168	137	159	134	45	160	31	31	28	138	145	184	110	94	84
gene:Zm00001d002644	139	114	113	112	315	309	79	152	92	208	171	165	266	323	276	174	154	174	168	148	163	261	266	289	164	30	246	182	230	219	286	263	297	149	152	184
gene:Zm00001d002645	0	0	2	0	0	0	0	0	0	0	0	0	0	0	0	0	0	0	0	0	0	0	1	0	0	1	0	0	0	1	0	1	0	0	0	0
gene:Zm00001d002647	0	0	5	0	0	0	1	4	0	0	1	1	1	0	1	0	1	1	0	2	3	1	3	3	0	0	0	1	1	0	1	0	1	0	1	1
gene:Zm00001d002649	3	4	1	5	13	8	3	5	4	3	4	8	9	8	11	1	1	4	14	9	12	10	11	18	12	0	9	6	7	5	18	23	26	8	6	14
gene:Zm00001d002650	6898	6744	7255	1855	4612	4121	3633	5609	3318	4026	3798	3930	2891	3329	3144	5103	5241	4670	6309	6064	6356	6564	6202	6515	8526	2009	9971	5475	4850	4770	5393	5073	5665	8947	8101	10849
gene:Zm00001d002652	0	0	0	0	0	0	0	0	0	0	0	0	0	0	0	0	0	0	0	0	0	0	0	0	0	0	0	0	0	0	0	0	0	0	0	0
gene:Zm00001d002654	358	351	355	433	1019	893	400	603	380	483	470	482	777	917	871	532	559	532	506	480	514	817	707	808	722	183	742	467	552	488	696	702	855	655	642	619
gene:Zm00001d002655	0	0	0	0	0	0	0	0	0	0	0	0	0	0	0	0	0	0	0	0	0	0	0	0	0	0	0	0	0	0	0	0	0	0	0	0
gene:Zm00001d002656	236	234	214	191	472	433	228	330	242	387	400	360	402	479	451	349	382	380	235	231	215	372	345	342	396	79	494	300	382	366	397	419	446	293	306	371
gene:Zm00001d002658	203	243	232	502	1218	1138	265	410	243	306	244	276	808	998	908	484	518	547	167	156	145	557	599	619	293	82	489	243	333	312	660	568	715	353	312	456
gene:Zm00001d002659	837	768	787	577	1424	1406	759	1099	691	1020	907	1049	1043	1144	1075	1134	1195	1094	685	790	826	1305	1212	1352	1406	364	1950	758	888	939	1197	1135	1319	1170	1187	1243
gene:Zm00001d002661	2345	2332	2401	72	125	114	57	79	44	226	198	211	131	153	130	126	150	120	922	895	1021	161	124	188	146	25	190	597	231	261	169	151	178	147	111	131
gene:Zm00001d002662	0	0	0	0	0	0	0	0	0	0	0	0	0	0	0	0	0	0	0	0	0	0	0	0	0	0	0	0	0	0	1	0	0	0	0	0
gene:Zm00001d002663	371	365	364	296	741	630	416	573	379	503	530	497	626	764	628	670	708	670	436	402	433	828	714	847	880	194	1241	496	586	599	806	806	894	778	747	876
gene:Zm00001d002665	0	0	0	0	0	0	0	0	0	0	0	0	0	0	0	0	0	0	0	0	0	0	0	0	0	0	0	0	0	0	0	0	0	0	0	0
gene:Zm00001d002666	0	0	0	0	0	0	0	0	1	0	1	0	0	0	0	0	0	0	0	0	0	0	0	0	0	0	0	0	1	0	0	9	0	0	0	0
gene:Zm00001d002668	77	85	99	81	256	221	30	55	32	115	125	130	200	188	145	48	46	38	85	68	96	175	182	255	143	32	209	106	102	117	217	215	281	91	98	123
gene:Zm00001d002669	34	17	24	5	13	4	3	6	4	8	7	7	16	13	21	3	3	5	8	6	6	4	4	5	6	3	10	5	10	7	15	13	10	6	7	4
gene:Zm00001d002670	0	0	0	0	0	0	0	0	0	1	1	0	0	0	0	0	0	0	0	0	0	2	0	0	1	0	0	0	0	0	0	0	0	0	0	0
gene:Zm00001d002671	0	0	0	0	0	0	0	0	0	1	0	0	0	0	1	0	0	1	3	2	2	0	0	2	0	0	0	0	0	1	0	0	0	0	1	1
gene:Zm00001d002673	39	40	63	142	346	341	202	252	171	128	114	116	292	349	346	307	308	272	463	457	498	249	226	234	99	33	93	504	607	555	231	272	254	127	118	116
gene:Zm00001d002674	24	9	11	19	46	38	29	53	20	7	14	11	26	36	23	41	46	52	2	1	2	2	1	1	0	0	1	4	3	3	1	1	3	1	1	0
gene:Zm00001d002675	0	0	0	0	0	0	0	0	0	0	0	0	0	0	0	0	0	0	0	0	0	0	0	0	0	0	0	0	0	0	0	0	0	0	0	0
gene:Zm00001d002676	50	72	68	37	88	54	37	52	22	82	64	73	60	100	84	53	56	52	57	72	78	57	47	64	54	15	69	74	66	67	84	66	79	58	48	65
gene:Zm00001d002677	74	87	94	54	114	106	73	92	47	67	94	63	135	115	135	103	105	93	127	88	121	139	131	129	120	40	156	103	81	96	142	158	180	129	134	131
gene:Zm00001d002678	538	558	604	304	745	625	368	619	374	602	547	587	629	856	617	601	638	595	462	465	496	767	767	769	887	212	1327	524	631	723	727	709	904	660	603	824
gene:Zm00001d002679	50	44	41	24	53	45	54	53	31	36	34	35	56	58	47	44	50	38	6	10	11	14	16	13	8	5	17	12	16	8	16	13	16	19	10	18
gene:Zm00001d002680	2143	2154	2178	361	1080	933	344	448	258	2115	1968	2129	974	1166	1081	711	814	706	1906	1696	1866	310	271	354	300	72	456	1472	1081	1059	401	355	420	474	420	518
gene:Zm00001d002681	0	0	0	2	1	1	0	0	0	0	0	0	0	0	0	0	0	1	1	0	1	0	0	0	0	0	0	1	0	1	0	1	0	1	0	0
gene:Zm00001d002682	124	142	127	135	305	292	104	171	95	220	186	205	265	285	272	171	200	156	82	100	113	247	216	254	186	31	249	137	193	199	249	242	247	174	150	130
gene:Zm00001d002683	0	0	0	0	0	0	0	0	0	0	0	0	0	0	0	0	0	0	0	0	0	0	0	0	0	0	0	0	0	0	0	0	0	0	0	0
gene:Zm00001d002684	153	112	137	97	191	201	84	127	69	150	184	185	153	192	178	132	129	93	91	82	103	83	90	81	106	22	105	74	107	101	118	91	109	113	65	75
gene:Zm00001d002685	198	195	177	110	289	231	125	164	110	168	194	160	201	235	249	182	174	161	102	133	127	158	182	185	155	41	228	95	74	74	210	158	190	144	117	145
gene:Zm00001d002687	0	1	1	2	2	3	1	0	0	1	0	4	3	5	4	7	5	2	0	0	0	0	0	0	0	0	0	0	0	0	0	0	0	0	0	0
gene:Zm00001d002688	322	354	337	369	905	775	471	719	406	307	305	323	813	888	825	581	601	638	288	258	282	507	453	481	247	56	283	322	329	277	490	505	525	417	414	486
gene:Zm00001d002690	6013	5628	5996	2362	5496	5031	4201	5797	3853	3749	3740	3722	4701	5294	5238	6854	6824	6429	2656	2509	2834	2585	2304	2610	2782	770	3291	2490	2485	2321	3086	3243	3419	3920	3456	3228
gene:Zm00001d002691	0	1	0	0	0	1	0	0	0	1	0	0	0	0	0	0	1	2	0	0	0	0	0	1	0	0	4	0	1	0	0	0	0	1	0	0
gene:Zm00001d002693	19	9	10	15	23	10	32	39	23	23	16	35	22	23	23	45	66	44	33	40	33	27	21	29	45	19	56	31	39	39	54	31	38	68	66	63
gene:Zm00001d002694	360	338	378	144	418	381	234	343	231	407	328	341	342	372	355	400	364	351	222	247	274	205	187	180	274	65	368	241	259	246	180	181	227	197	154	253
gene:Zm00001d002695	416	441	440	157	402	315	183	344	154	483	413	459	586	651	616	359	418	410	701	735	751	734	694	706	477	112	723	676	592	583	957	988	1085	666	633	685
gene:Zm00001d002696	78	70	81	7	9	17	5	2	4	25	33	19	29	42	38	20	18	14	9	6	16	2	6	7	1	1	3	9	11	13	10	11	7	4	2	2
gene:Zm00001d002698	0	0	0	0	0	0	0	0	0	0	0	0	0	0	0	0	0	0	0	0	0	0	0	0	0	0	0	0	0	0	0	0	0	0	0	0
gene:Zm00001d002699	0	0	1	0	0	1	0	0	0	0	1	0	0	0	0	0	0	0	0	0	0	0	0	0	0	0	0	0	0	0	0	0	0	0	0	0
gene:Zm00001d002700	36	42	44	17	37	28	2	1	1	140	145	147	40	38	35	6	6	5	67	64	88	65	49	55	2	1	3	120	155	148	36	52	60	0	3	3
gene:Zm00001d002701	0	0	0	0	0	0	0	0	0	0	0	0	0	0	0	0	0	0	0	0	0	0	0	0	0	0	0	0	0	0	0	0	0	0	0	0
gene:Zm00001d002703	524	555	582	320	729	594	366	581	319	483	474	552	649	787	743	635	661	565	565	596	593	601	557	708	603	169	883	545	557	534	694	665	717	614	557	668
gene:Zm00001d002704	1589	1558	1693	800	2002	1866	854	1223	785	2338	2190	2277	2067	2353	2205	1732	1616	1531	1949	1830	2105	1338	1292	1410	1015	218	1329	1561	1302	1416	2042	1994	2145	1547	1458	1322
gene:Zm00001d002705	845	854	978	162	461	347	205	282	172	374	370	374	317	372	332	208	200	193	473	455	432	240	221	264	161	20	197	329	267	259	277	237	248	162	148	167
gene:Zm00001d002706	0	0	0	0	0	0	0	1	0	0	0	0	0	0	0	0	1	1	0	0	1	2	0	0	3	0	0	0	0	0	0	0	1	0	0	0
gene:Zm00001d002707	30	10	20	4	16	14	27	24	7	5	2	4	0	5	2	73	79	80	17	25	20	12	17	24	45	13	34	12	10	6	10	17	17	71	68	53
gene:Zm00001d002708	618	612	601	337	843	808	665	977	599	665	606	666	585	660	622	769	759	696	976	892	1009	1996	2065	2069	2227	512	2803	912	1068	936	1915	1880	1977	2548	2329	2567
gene:Zm00001d002710	0	0	0	0	0	0	0	0	0	0	0	0	0	0	0	0	0	0	0	0	0	0	0	0	0	0	0	0	0	0	0	0	0	0	0	0
gene:Zm00001d002711	233	252	310	152	353	342	168	234	133	329	273	290	279	354	295	218	237	228	543	532	545	564	509	611	691	156	917	530	505	515	564	546	556	597	603	689
gene:Zm00001d002712	0	0	0	1	0	1	0	1	0	0	0	1	0	0	0	0	0	0	2	1	2	7	5	10	11	2	5	0	2	0	4	6	9	5	5	3
gene:Zm00001d002713	79	59	72	33	80	80	32	54	27	84	73	95	97	101	89	57	48	47	21	30	26	35	43	45	27	5	53	25	18	21	45	38	42	26	35	42
gene:Zm00001d002714	0	0	0	0	0	0	0	0	0	1	0	0	0	0	0	0	0	0	0	0	0	0	0	0	0	0	0	0	0	0	0	0	0	0	0	0
gene:Zm00001d002715	418	473	482	796	1820	1664	588	1055	601	645	596	668	1541	1812	1739	1217	1426	1217	516	484	535	2068	2003	1999	993	222	1259	614	776	701	2343	2031	2283	1393	1212	1737
gene:Zm00001d002716	1043	1059	1043	650	1574	1459	1045	1521	893	1295	1216	1229	1359	1609	1481	1710	1630	1517	1124	997	1130	1423	1450	1469	1484	336	2157	1095	1098	1076	1517	1410	1567	1564	1431	1566
gene:Zm00001d002717	0	0	0	0	0	0	0	0	0	0	0	1	1	0	0	0	0	0	0	0	0	0	0	0	0	1	0	0	0	0	0	0	1	0	0	0
gene:Zm00001d002718	408	411	431	395	897	861	496	655	410	429	433	438	819	968	942	702	662	578	313	282	339	846	780	859	557	155	559	266	251	207	920	904	1017	570	509	529
gene:Zm00001d002719	0	0	0	0	0	0	0	0	0	0	0	0	0	0	0	0	0	0	0	0	0	0	0	0	0	0	0	0	0	0	0	0	0	0	0	0
gene:Zm00001d002720	0	0	1	0	0	0	0	0	0	0	0	0	0	0	0	0	0	0	0	0	0	0	0	0	0	0	0	0	0	0	0	0	0	0	0	0
gene:Zm00001d002721	217	211	214	2	5	5	1	2	1	70	66	69	13	20	17	11	11	7	5	4	4	1	0	1	0	0	0	9	3	4	3	4	2	1	1	1
gene:Zm00001d002722	0	0	0	0	0	0	0	0	0	0	0	0	0	0	0	0	0	0	0	0	0	0	0	0	0	0	0	0	0	0	0	0	0	0	0	0
gene:Zm00001d002723	0	0	0	1	1	0	2	1	0	0	1	0	1	0	0	0	0	2	0	0	0	0	0	0	0	0	1	1	1	0	2	0	0	0	3	0
gene:Zm00001d002724	6	5	1	8	7	5	132	177	106	0	4	3	6	2	6	223	217	204	4	2	7	8	7	6	147	38	93	9	9	5	12	15	9	286	220	235
gene:Zm00001d002725	85	82	107	39	101	71	27	43	19	165	163	170	133	114	117	36	45	30	72	82	94	120	102	140	48	14	75	117	145	163	130	139	177	51	44	61
gene:Zm00001d002726	0	0	0	1	0	1	0	1	0	1	0	1	4	1	2	0	0	0	0	1	0	0	1	1	1	1	0	0	2	1	4	1	6	1	0	3
gene:Zm00001d002727	12	13	7	6	13	10	6	12	4	13	14	10	10	17	11	8	7	8	6	10	9	13	11	6	12	2	23	10	9	3	9	13	19	11	12	11
gene:Zm00001d002728	0	0	0	0	0	0	0	0	0	0	0	0	0	1	0	0	0	0	0	0	0	0	0	0	0	0	0	0	0	0	0	0	0	0	0	0
gene:Zm00001d002729	0	0	0	0	0	0	0	2	0	0	0	0	1	0	1	0	1	0	0	0	0	2	0	0	0	0	3	1	0	0	0	0	0	0	0	1
gene:Zm00001d002730	69	52	52	30	71	62	20	40	29	48	68	48	53	49	71	32	39	24	44	58	53	68	60	55	48	16	62	44	48	28	66	70	57	44	41	44
gene:Zm00001d002731	11	6	5	1	3	3	1	0	0	1	3	0	1	2	1	2	1	0	3	3	2	3	6	4	0	0	3	0	2	0	3	6	4	2	0	1
gene:Zm00001d002732	0	0	0	0	0	0	0	0	0	0	0	0	0	0	0	0	0	1	0	0	0	0	0	0	0	0	0	0	0	0	0	0	0	0	0	0
gene:Zm00001d002733	15	15	11	0	4	4	2	2	0	4	1	0	4	2	2	6	0	3	19	12	18	4	3	6	6	2	4	8	1	5	7	10	5	4	5	4
gene:Zm00001d002734	317	294	332	154	383	320	170	214	118	192	205	221	271	302	274	187	181	181	218	173	205	306	247	282	194	48	175	184	202	215	246	280	274	157	164	179
gene:Zm00001d002735	0	0	0	0	1	0	0	1	0	0	1	0	0	0	0	0	0	0	0	0	0	0	1	0	0	0	2	0	1	1	2	1	0	1	0	2
gene:Zm00001d002736	15	17	10	1	0	0	0	0	0	6	6	7	0	0	0	0	0	1	3	1	1	3	2	0	1	0	1	2	0	1	0	0	2	0	0	1
gene:Zm00001d002737	441	432	455	156	367	330	188	247	119	396	363	381	291	347	352	249	234	192	438	371	418	306	306	331	192	52	309	405	377	346	340	355	421	275	241	235
gene:Zm00001d002738	0	0	0	0	0	0	0	0	0	0	0	1	3	0	1	0	0	0	14	20	12	41	29	29	28	5	15	13	16	12	37	40	52	21	22	14
gene:Zm00001d002739	44	41	47	49	102	91	48	77	40	25	20	19	75	53	70	147	140	124	38	39	42	86	80	82	61	21	112	32	19	19	73	67	75	74	71	77
gene:Zm00001d002740	0	0	0	0	1	0	0	0	0	2	0	1	1	1	1	0	0	0	0	1	0	0	0	0	0	0	1	0	0	0	0	3	2	0	0	0
gene:Zm00001d002741	0	0	0	0	0	0	0	0	0	0	0	0	0	0	0	0	0	0	0	0	0	0	0	0	0	0	0	0	0	0	0	0	0	0	0	0
gene:Zm00001d002742	176	181	189	61	140	134	78	124	63	167	149	169	132	141	157	153	158	138	145	126	147	141	138	214	189	32	260	154	172	168	192	190	171	182	173	178
gene:Zm00001d002743	29	23	16	0	0	0	0	0	0	0	0	0	0	0	0	0	0	0	1	1	0	0	0	0	0	0	0	0	0	0	0	0	0	0	0	0
gene:Zm00001d002744	0	0	1	0	0	0	0	0	0	0	0	0	2	1	1	1	2	0	0	0	0	2	1	1	1	0	0	1	0	0	1	0	0	1	0	0
gene:Zm00001d002745	0	0	0	0	0	0	0	0	0	0	0	0	0	0	0	0	0	0	0	0	0	0	0	0	0	0	0	0	0	0	0	0	0	0	0	0
gene:Zm00001d002746	0	0	0	0	0	0	0	0	0	0	0	0	0	0	0	0	0	0	0	0	0	0	0	0	0	0	0	0	0	0	0	0	0	0	0	0
gene:Zm00001d002747	0	0	0	0	0	0	0	0	0	0	0	0	0	0	0	0	0	0	0	0	0	0	0	0	0	0	0	0	0	0	0	0	0	0	0	0
gene:Zm00001d002748	0	0	0	0	0	0	0	0	0	0	0	0	0	0	0	1	0	0	2	0	0	2	2	1	4	3	2	0	0	0	4	3	1	1	0	1
gene:Zm00001d002750	0	0	0	0	0	0	0	0	0	0	0	0	0	0	0	0	0	0	0	0	0	0	0	0	0	0	0	0	0	0	0	0	0	0	0	0
gene:Zm00001d002751	48	55	54	38	69	71	39	64	24	60	52	60	58	73	80	40	48	41	36	59	52	183	171	197	210	60	307	48	71	67	152	143	172	215	207	253
gene:Zm00001d002753	0	0	0	0	0	0	0	0	0	0	0	0	0	0	0	0	0	0	0	0	0	0	0	0	0	2	0	0	0	0	0	0	0	0	0	1
gene:Zm00001d002754	19	16	15	0	0	1	2	0	0	9	5	1	2	4	0	2	2	0	8	2	10	1	5	8	3	0	3	15	9	9	9	2	10	4	3	2
gene:Zm00001d002755	2	0	3	0	1	0	1	2	0	0	2	0	1	3	2	5	3	4	1	1	0	4	3	5	1	1	2	1	0	3	2	3	2	3	3	3
gene:Zm00001d002756	15	10	8	9	25	16	10	9	4	12	8	16	17	8	9	12	9	16	103	86	104	146	95	120	107	39	127	64	72	72	108	104	109	116	110	120
gene:Zm00001d002757	21	24	42	17	36	26	9	19	16	33	19	24	25	33	33	7	15	6	31	30	36	27	23	43	23	7	31	35	32	38	31	29	27	16	14	11
gene:Zm00001d002758	360	381	373	24	48	45	2	0	0	376	394	416	60	59	49	4	2	2	332	335	345	42	51	54	4	1	6	378	435	435	68	56	50	2	3	4
gene:Zm00001d002759	983	925	1061	60	116	128	315	454	271	1053	935	963	135	169	149	543	564	465	1513	1505	1561	215	184	212	299	65	369	1497	1436	1358	157	167	207	263	230	254
gene:Zm00001d002760	0	0	0	0	0	0	0	0	0	0	0	0	0	0	0	0	0	0	0	0	0	0	0	0	0	0	0	0	0	0	0	0	0	1	0	0
gene:Zm00001d002761	0	0	0	0	0	2	0	0	1	0	0	0	1	1	1	2	1	0	0	0	1	9	6	6	0	0	2	0	0	1	5	9	11	1	1	0
gene:Zm00001d002762	49	56	50	70	146	134	76	114	65	131	138	133	126	121	132	78	86	74	115	96	117	165	170	207	62	23	59	168	240	204	174	152	183	92	84	77
gene:Zm00001d002768	0	0	0	0	1	0	0	0	0	1	0	0	0	0	0	0	0	0	0	0	1	0	0	0	0	0	0	0	0	0	0	0	0	0	0	0
gene:Zm00001d002769	0	0	0	0	0	0	0	1	0	0	0	1	0	0	0	0	0	0	0	0	0	0	0	0	0	0	0	0	0	0	0	0	0	0	0	0
gene:Zm00001d002770	920	954	970	515	1397	1132	490	736	431	799	775	874	1055	1264	1157	690	709	726	1101	1055	1225	1335	1290	1344	979	226	1306	1170	1209	1220	1476	1239	1579	1075	947	1183
gene:Zm00001d002771	0	0	0	1	10	8	1	0	0	1	1	1	8	10	13	0	1	1	1	3	3	7	6	10	0	1	5	3	0	3	5	11	7	1	0	1
gene:Zm00001d002772	12	7	7	1	4	2	1	1	0	1	1	3	0	1	2	1	5	1	8	7	9	3	0	1	4	3	3	11	11	14	12	12	8	13	8	6
gene:Zm00001d002773	0	0	0	0	0	0	1	0	0	0	0	0	1	0	0	0	0	0	0	0	0	0	0	0	1	0	0	1	1	1	2	1	0	0	0	1
gene:Zm00001d002774	47	46	49	2	4	0	3	5	1	7	5	1	2	3	1	1	1	1	5	2	5	2	0	0	1	0	0	1	2	0	0	1	3	2	2	0
gene:Zm00001d002775	785	742	747	274	643	588	470	683	432	676	687	697	528	607	567	753	726	648	745	738	779	543	516	636	711	171	834	696	664	663	650	649	653	807	739	815
gene:Zm00001d002776	1	2	1	3	16	8	6	10	5	6	7	10	13	15	11	25	24	28	7	4	9	15	12	10	5	2	14	9	6	3	21	26	10	10	14	19
gene:Zm00001d002777	0	0	0	0	0	0	0	0	0	0	0	0	0	0	0	0	0	0	0	0	0	0	0	0	0	0	0	0	0	0	1	0	0	0	0	0
gene:Zm00001d002778	424	378	438	158	417	369	231	373	209	387	369	408	391	445	391	471	464	420	334	307	320	462	426	468	379	102	566	349	439	419	418	434	469	372	334	416
gene:Zm00001d002781	2760	2570	2739	1366	3514	3048	3097	5074	2926	2878	2694	2873	2533	3150	2700	5435	5949	5285	3036	2940	3158	3419	3243	3530	4337	1005	5757	2978	3010	3172	3414	3162	3671	5171	4616	5990
gene:Zm00001d002782	0	0	0	0	0	0	0	0	0	0	0	0	0	0	0	0	0	0	0	0	0	0	0	0	0	0	0	0	0	0	0	0	0	0	0	0
gene:Zm00001d002783	0	0	0	0	3	0	2	2	0	0	0	1	0	1	0	3	3	0	0	1	0	3	3	0	1	2	2	0	1	1	2	1	1	2	1	2
gene:Zm00001d002784	4	3	5	1	0	2	1	1	0	0	1	2	1	0	0	2	2	0	0	2	4	0	3	1	3	1	5	1	1	2	2	1	0	1	2	2
gene:Zm00001d002787	388	415	391	240	687	565	468	672	385	412	410	468	606	709	649	692	663	649	450	452	453	699	666	732	779	167	1262	479	499	474	747	723	833	821	720	762
gene:Zm00001d002788	280	278	277	498	1163	1033	587	830	488	450	409	432	933	1113	972	756	854	754	313	260	255	1101	987	1116	1315	365	1337	391	494	533	1084	1050	1184	958	875	963
gene:Zm00001d002789	404	386	429	835	1981	1939	440	691	390	704	678	733	1620	1790	1760	588	639	604	474	492	489	1428	1386	1581	608	137	964	601	761	760	1747	1648	1830	736	642	553
gene:Zm00001d002790	318	314	326	241	575	604	312	450	255	295	231	283	459	522	519	479	479	427	411	354	426	483	519	481	444	111	741	299	254	249	601	549	711	488	425	482
gene:Zm00001d002791	372	402	400	235	583	566	399	573	312	430	392	438	564	648	528	523	517	470	344	372	422	555	527	597	669	177	1024	414	443	506	530	481	605	558	489	801
gene:Zm00001d002793	0	0	0	0	0	0	0	0	0	0	0	0	0	0	0	0	0	0	0	0	0	0	0	0	0	0	0	0	0	0	0	0	0	0	0	0
gene:Zm00001d002794	6	12	8	0	1	6	1	2	2	10	3	4	1	2	5	3	3	5	18	21	25	7	5	5	3	2	12	13	13	11	5	4	7	4	6	8
gene:Zm00001d002796	50	38	48	18	40	46	90	123	85	24	18	33	43	47	36	176	164	175	47	49	47	54	60	61	203	42	263	36	31	24	64	46	59	155	161	180
gene:Zm00001d002797	271	289	297	197	399	393	130	220	139	488	536	562	451	532	477	148	141	115	269	302	323	493	501	516	373	84	480	485	713	715	498	458	568	310	287	381
gene:Zm00001d002798	46	30	51	21	38	37	19	28	12	21	21	16	23	42	26	19	24	21	37	42	49	33	22	26	32	10	37	28	8	9	22	14	21	51	34	42
gene:Zm00001d002799	77	71	70	0	9	3	56	72	59	9	8	14	1	8	6	76	83	69	171	156	174	40	20	32	321	81	301	114	75	76	39	34	50	332	328	278
gene:Zm00001d002801	196	170	179	39	109	81	36	29	21	32	31	29	120	151	154	26	24	25	96	95	97	217	181	234	235	61	242	65	22	21	244	241	290	198	166	211
gene:Zm00001d002802	12	5	8	1	2	1	1	1	1	3	1	6	4	5	5	1	1	0	14	11	5	4	2	3	5	5	1	6	7	6	9	3	9	6	2	6
gene:Zm00001d002803	0	0	0	0	0	0	0	0	0	1	1	0	0	0	0	0	0	0	1	1	0	1	0	0	1	0	0	3	3	3	2	1	0	0	0	1
gene:Zm00001d002804	0	0	0	0	0	0	0	0	0	0	0	0	0	0	0	0	0	0	0	0	0	0	0	0	0	0	0	0	0	0	0	0	0	0	0	0
gene:Zm00001d002805	0	0	0	0	0	0	0	0	0	0	0	0	0	0	0	0	0	0	0	0	0	0	0	0	0	0	0	0	0	0	0	0	0	0	0	0
gene:Zm00001d002806	50	34	47	20	35	29	9	9	8	91	101	100	48	51	65	10	10	9	37	42	53	73	52	53	19	0	15	62	109	107	101	101	96	13	12	14
gene:Zm00001d002809	1	2	1	0	0	0	0	1	0	2	2	4	0	0	0	1	0	0	4	1	0	1	0	2	0	0	0	0	1	0	2	2	2	2	1	1
gene:Zm00001d002810	859	830	848	280	739	685	470	661	392	654	603	636	599	711	680	798	806	750	574	537	590	688	690	746	623	164	850	644	602	651	699	732	757	743	725	702
gene:Zm00001d002811	419	402	426	160	334	321	101	151	115	400	464	420	296	339	317	184	180	153	331	323	353	378	318	379	254	77	282	351	489	436	359	362	438	218	190	182
gene:Zm00001d002812	103	119	120	50	136	125	54	87	45	149	141	139	82	120	136	76	64	60	115	111	96	150	147	150	104	16	115	113	152	122	146	154	175	86	75	88
gene:Zm00001d002813	0	0	0	0	0	0	0	0	0	0	0	0	0	0	0	0	0	0	0	0	0	0	0	0	0	0	0	0	0	0	0	0	0	0	0	0
gene:Zm00001d002814	55	47	46	36	49	45	28	35	32	70	49	56	59	74	63	51	63	58	64	55	72	38	42	37	86	35	96	78	69	65	63	54	49	39	40	49
gene:Zm00001d002815	2674	2618	2723	1129	2631	2353	1861	2764	1694	2588	2567	2462	1793	1897	2043	2816	2758	2505	2302	2209	2584	2432	2033	2215	2001	537	1782	2399	2508	2401	2174	2214	2460	2418	2121	2338
gene:Zm00001d002816	0	0	0	0	0	0	0	0	0	0	0	0	0	0	0	0	0	0	0	0	0	0	0	0	0	0	0	0	0	0	0	0	0	0	0	0
gene:Zm00001d002817	6	7	11	3	8	9	17	0	5	6	5	6	8	7	9	2	1	1	17	15	16	17	14	32	13	4	38	13	28	19	44	41	38	28	20	39
gene:Zm00001d002818	0	0	0	0	0	0	0	0	0	0	0	0	0	0	0	0	0	0	0	0	0	0	0	0	0	0	0	0	0	0	0	0	0	0	0	0
gene:Zm00001d002819	314	293	349	225	556	464	168	253	162	331	313	332	374	458	435	217	218	184	312	284	255	460	452	442	374	87	500	294	352	302	467	443	476	263	284	266
gene:Zm00001d002820	13	7	13	15	36	34	3	6	1	39	36	32	17	25	24	5	4	0	23	17	23	41	37	55	12	2	5	27	24	22	52	38	55	13	11	8
gene:Zm00001d002821	0	0	0	0	0	0	0	0	0	0	0	0	0	0	0	0	0	0	0	0	0	0	0	0	0	0	0	0	0	0	0	0	0	0	0	0
gene:Zm00001d002822	25763	25143	25971	3221	8209	7423	10138	15130	8943	8734	8396	8631	5635	6467	6049	13537	13206	12222	24184	22571	24132	5576	5323	5890	10729	2535	15941	15216	6006	5934	6106	6053	6467	11838	11351	10864
gene:Zm00001d002823	369	334	339	40	81	77	28	64	30	114	91	120	87	98	121	75	82	61	459	463	490	67	67	62	61	12	105	302	115	115	91	68	91	69	88	82
gene:Zm00001d002824	377	437	398	515	1263	1205	511	755	466	791	725	779	1006	1145	1068	1019	900	881	473	399	410	1796	1654	1933	1042	229	1443	653	904	831	1711	1702	1768	1103	1076	1008
gene:Zm00001d002825	39	37	64	25	78	65	61	67	69	44	43	45	32	54	59	96	89	68	56	50	54	91	82	87	139	22	145	62	52	43	69	93	95	115	78	83
gene:Zm00001d002826	6	8	6	0	1	2	1	1	0	16	17	11	3	3	2	5	2	2	12	8	4	3	5	7	2	1	3	8	18	11	7	6	3	1	5	1
gene:Zm00001d002827	412	417	416	212	616	537	336	585	356	540	495	485	463	577	495	507	527	489	483	428	436	650	589	651	664	158	831	514	659	652	595	493	643	606	559	750
gene:Zm00001d002828	0	0	0	0	1	0	0	0	0	1	1	0	0	1	0	0	2	0	1	0	2	1	1	2	1	0	1	2	0	0	1	3	2	1	0	1
gene:Zm00001d002829	1	3	2	0	0	2	0	0	0	0	3	0	0	0	0	0	1	0	0	1	0	0	3	0	1	0	0	0	1	1	0	0	0	0	1	0
gene:Zm00001d002830	239	245	226	52	119	115	110	146	107	160	143	145	110	131	123	197	221	212	256	244	214	99	66	97	180	46	191	182	146	149	142	114	124	221	158	156
gene:Zm00001d002833	11	12	17	2	0	0	0	1	0	0	0	0	0	1	0	2	0	1	10	5	8	0	0	0	3	1	2	5	0	0	0	0	1	3	1	0
gene:Zm00001d002834	281	261	301	154	329	299	261	406	244	179	161	163	195	245	268	314	364	306	203	196	224	217	204	213	290	71	272	140	117	106	194	223	206	289	248	235
gene:Zm00001d002835	9	7	8	4	10	14	17	16	12	9	1	9	5	17	8	9	20	26	15	14	12	17	16	27	40	7	48	15	13	12	20	20	21	18	18	26
gene:Zm00001d002836	145	136	162	295	695	613	301	500	295	266	291	314	625	845	739	502	582	461	282	289	292	682	650	714	551	113	825	267	325	296	791	693	804	536	463	571
gene:Zm00001d002837	13	12	24	25	51	35	11	7	4	24	19	30	42	56	44	12	10	8	17	13	23	74	62	72	30	7	35	20	33	13	54	53	77	23	28	22
gene:Zm00001d002838	0	0	0	0	0	0	0	0	0	0	0	0	0	0	0	0	0	0	0	0	0	0	0	0	0	0	0	0	0	0	0	0	0	0	0	0
gene:Zm00001d002839	0	0	0	0	0	0	0	0	0	0	0	0	0	0	0	0	0	0	0	0	0	0	0	0	0	0	0	0	0	0	0	0	0	0	0	0
gene:Zm00001d002841	0	0	0	0	0	0	0	0	0	0	0	0	0	0	0	0	0	0	0	0	0	0	0	0	0	0	0	0	0	0	0	0	0	0	0	0
gene:Zm00001d002842	4741	4384	4583	3719	9482	8929	1930	2700	1707	8558	8254	8743	8531	9439	9134	2630	2624	2464	2933	2880	3139	11277	10624	11712	4657	932	7192	4429	5772	6074	10982	10614	12058	4465	4420	4134
gene:Zm00001d002843	1	0	0	0	0	0	0	0	0	0	0	0	0	0	0	0	0	0	1	0	0	0	0	0	0	0	0	0	0	0	0	1	0	0	1	0
gene:Zm00001d002844	0	0	0	0	2	2	1	0	0	0	0	1	1	0	0	0	0	0	0	0	0	1	1	0	0	0	0	0	0	0	1	2	0	0	1	1
gene:Zm00001d002845	1	0	1	0	2	3	1	1	0	1	1	0	0	0	2	0	2	0	0	0	0	1	0	0	2	0	0	0	0	0	1	0	2	1	1	0
gene:Zm00001d002846	0	0	0	0	0	0	0	0	0	0	0	0	0	0	0	0	0	0	0	0	0	0	0	0	0	0	0	0	0	0	0	0	0	0	0	0
gene:Zm00001d002847	27	27	15	24	51	45	18	27	18	94	95	100	97	148	123	62	87	58	222	211	216	143	147	160	76	11	81	142	36	48	366	323	372	220	213	170
gene:Zm00001d002848	14	11	15	0	0	1	2	0	0	0	6	2	0	1	0	4	2	2	16	12	23	2	1	3	11	3	7	19	18	19	4	0	4	2	5	8
gene:Zm00001d002849	4	3	3	5	10	5	5	7	1	2	2	6	7	14	11	1	1	3	6	3	1	10	11	8	3	1	8	3	0	8	11	12	15	4	4	1
gene:Zm00001d002850	28	20	33	22	52	60	32	44	32	41	46	51	84	119	92	92	90	73	25	19	30	85	79	100	83	21	108	30	31	40	148	150	155	104	74	92
gene:Zm00001d002851	245	256	245	15	21	27	4	3	4	8	5	6	35	24	41	6	2	6	89	109	103	14	10	14	11	2	8	55	6	14	31	18	23	2	5	2
gene:Zm00001d002852	0	0	0	0	0	0	0	0	0	0	0	0	0	0	0	0	0	0	0	0	0	0	0	0	0	0	0	0	0	0	0	0	0	0	0	0
gene:Zm00001d002853	313	315	283	229	581	527	147	234	136	430	404	387	540	601	605	263	224	192	317	312	349	658	586	689	276	54	334	444	530	498	758	726	793	350	366	345
gene:Zm00001d002854	686	714	738	403	1014	884	430	653	396	696	615	697	777	919	868	588	598	533	843	843	898	1072	966	1104	1025	207	1406	868	948	968	1084	1006	1226	808	744	700
gene:Zm00001d002856	359	283	352	236	545	472	289	458	267	521	494	529	435	538	488	410	345	341	574	517	565	451	342	454	299	73	335	510	557	525	465	512	534	319	245	277
gene:Zm00001d002857	368	379	367	163	460	408	242	373	204	338	318	352	409	474	439	403	346	334	355	299	358	483	419	472	442	108	683	393	381	323	433	418	505	403	417	426
gene:Zm00001d002859	227	224	246	25	50	35	36	47	41	264	241	220	58	40	54	52	47	61	202	255	248	30	30	45	74	21	60	255	234	267	35	48	48	57	65	58
gene:Zm00001d002860	2	6	9	1	1	1	7	13	7	1	3	3	2	4	2	5	7	5	13	17	10	0	3	1	25	9	16	3	6	3	4	1	0	13	24	4
gene:Zm00001d002862	0	0	0	0	0	0	0	0	0	0	0	0	0	0	0	0	0	0	0	0	0	0	0	0	0	0	0	0	0	0	0	0	0	0	0	0
gene:Zm00001d002863	0	0	0	0	0	0	0	0	0	0	0	0	0	0	0	0	0	0	0	0	0	0	0	0	0	0	0	0	0	0	0	0	0	0	0	0
gene:Zm00001d002864	150	120	150	73	232	206	82	153	87	87	95	107	194	220	241	206	209	209	128	129	123	218	209	220	179	59	332	139	135	135	298	247	295	183	165	161
gene:Zm00001d002865	523	460	510	125	293	288	140	207	142	84	97	91	242	339	299	257	247	257	244	242	265	303	295	292	237	81	341	201	139	91	275	286	362	228	193	242
gene:Zm00001d002866	0	0	0	0	0	0	0	0	0	0	0	0	0	0	0	0	0	0	0	0	0	0	0	0	0	0	0	0	0	0	0	0	0	0	0	0
gene:Zm00001d002867	9	7	5	0	1	3	0	0	0	2	3	3	1	2	0	0	0	0	5	6	8	1	3	1	0	0	0	0	7	1	1	0	2	0	0	1
gene:Zm00001d002868	37	45	37	19	36	38	24	30	23	23	32	17	40	41	38	20	29	25	26	34	32	40	42	51	31	10	39	16	29	26	27	45	37	33	22	24
gene:Zm00001d002869	3	0	0	1	4	3	0	5	2	5	2	3	4	0	1	6	5	2	3	3	1	1	1	2	7	3	7	3	1	1	1	5	3	10	7	5
gene:Zm00001d002870	0	1	0	0	0	0	0	0	0	0	0	0	0	0	0	0	0	0	0	0	0	0	0	0	0	0	0	0	0	0	0	0	0	0	0	0
gene:Zm00001d002871	3749	3494	3708	805	1983	1764	992	1365	846	2189	2211	2150	1615	1734	1665	1170	1195	1107	3198	2993	3250	1378	1226	1446	1976	555	2270	2524	1917	2018	2170	2157	2266	2135	1957	2092
gene:Zm00001d002872	2	1	0	0	0	0	0	0	0	0	0	0	0	0	1	1	0	0	2	1	0	0	0	0	0	0	1	0	1	0	1	0	1	2	1	1
gene:Zm00001d002873	532	516	584	371	906	840	281	387	242	648	626	669	624	705	663	421	462	445	645	631	681	772	672	816	528	136	824	692	757	747	762	742	853	492	433	411
gene:Zm00001d002874	0	0	0	0	0	0	0	0	0	0	0	0	0	0	0	0	0	0	0	0	0	0	0	0	0	0	0	0	0	0	0	0	0	0	0	0
gene:Zm00001d002875	90	78	72	49	128	121	77	140	105	70	73	97	105	154	108	135	163	117	143	148	146	265	249	256	393	115	582	149	160	169	286	248	262	284	253	350
gene:Zm00001d002876	11	24	19	50	127	116	26	47	30	40	41	42	90	129	118	43	51	57	28	22	22	115	114	97	52	12	82	28	30	32	127	133	138	42	46	58
gene:Zm00001d002878	100	73	110	54	136	128	65	121	63	113	127	122	96	110	100	137	113	110	101	93	125	185	148	173	213	48	258	143	101	110	189	124	184	149	152	137
gene:Zm00001d002879	14	24	18	10	20	20	10	8	11	24	12	15	15	25	12	15	11	14	11	7	7	22	17	17	17	9	28	14	19	12	18	20	38	17	15	13
gene:Zm00001d002880	1085	1152	1193	409	1043	967	404	615	385	892	850	887	976	1033	996	630	666	573	805	811	849	1116	957	1038	603	136	975	856	904	941	1204	1238	1386	800	765	728
gene:Zm00001d002881	0	0	2	3	24	18	4	8	1	2	3	1	25	31	34	14	15	6	2	1	2	12	12	15	7	2	10	1	1	6	28	26	45	5	3	5
gene:Zm00001d002882	116	121	124	35	67	55	45	53	50	59	65	75	61	88	78	59	69	44	92	80	86	68	72	71	58	12	62	68	51	57	68	58	63	62	44	63
gene:Zm00001d002884	89	80	107	25	51	51	19	41	17	68	86	69	50	50	67	30	22	24	128	122	176	102	87	120	50	16	50	139	111	97	101	145	164	69	83	54
gene:Zm00001d002885	0	0	0	0	0	0	0	0	0	0	0	0	0	0	0	0	0	0	0	0	0	0	0	0	0	1	0	0	0	0	0	0	0	0	0	0
gene:Zm00001d002886	0	0	0	0	0	0	0	0	0	0	0	0	0	0	0	0	0	0	0	0	0	0	0	0	0	0	0	0	0	0	0	0	0	0	0	0
gene:Zm00001d002887	0	0	0	0	0	0	0	0	0	0	0	0	0	0	0	0	0	0	0	0	0	0	0	0	0	0	0	0	0	0	0	0	0	0	0	0
gene:Zm00001d002888	0	0	0	0	0	0	0	0	0	0	0	0	0	0	0	0	0	0	0	0	0	0	0	0	0	0	0	0	0	0	0	0	0	0	0	0
gene:Zm00001d002889	1226	1206	1347	550	1430	1282	597	869	478	1302	1138	1296	1174	1428	1245	882	884	812	1099	1109	1178	1518	1377	1567	1242	274	1701	1284	1328	1399	1551	1549	1717	1277	1092	1205
gene:Zm00001d002890	10	11	8	4	12	19	4	7	1	6	6	6	22	19	13	4	16	10	10	11	14	11	6	15	5	0	13	14	4	10	12	11	21	9	6	11
gene:Zm00001d002891	331	276	344	213	589	431	305	547	294	412	373	405	438	524	457	560	602	500	318	307	339	408	418	474	558	141	785	396	437	417	502	493	572	489	433	476
gene:Zm00001d002893	8	15	14	6	22	9	8	6	6	14	14	9	14	12	18	12	6	5	20	24	24	14	15	19	22	4	27	30	21	26	15	26	20	22	27	20
gene:Zm00001d002896	4247	4024	4235	1788	4134	3691	875	1277	753	5818	5431	5844	3341	3843	3715	1150	1131	1079	4133	3864	4099	2795	2787	2746	1012	288	1207	4689	6038	5655	2995	2742	3148	1052	943	985
gene:Zm00001d002897	10	12	7	23	47	41	22	41	19	7	8	9	40	51	39	116	108	95	5	4	7	14	13	17	16	5	7	7	4	8	50	45	42	2	8	9
gene:Zm00001d002898	3	9	4	0	0	4	19	9	13	1	2	3	2	0	1	11	19	6	8	6	3	3	1	2	14	8	14	8	3	8	1	2	1	9	10	11
gene:Zm00001d002899	0	0	0	0	0	0	0	0	0	0	0	0	0	0	0	0	0	0	0	0	0	0	0	0	0	0	0	0	0	0	0	0	0	0	0	0
gene:Zm00001d002900	0	0	0	0	0	0	0	0	0	0	0	0	0	0	0	0	0	0	0	0	0	0	0	0	0	0	0	0	0	0	0	0	0	0	0	0
gene:Zm00001d002901	1	0	1	10	14	14	11	20	12	1	3	2	9	18	14	125	106	109	3	2	1	43	30	31	38	10	41	8	9	3	47	51	39	49	55	49
gene:Zm00001d002902	2	2	0	2	3	2	2	1	2	0	0	1	3	5	4	2	2	2	5	1	7	4	3	1	5	0	9	0	3	1	10	8	3	6	5	2
gene:Zm00001d002904	0	0	0	0	0	0	0	0	0	0	0	0	0	0	0	0	0	0	0	0	0	0	0	0	0	0	0	0	0	0	0	0	0	0	0	0
gene:Zm00001d002905	284	252	254	6	16	7	4	13	5	31	13	16	16	30	27	14	14	11	152	131	153	15	8	9	12	3	15	85	12	13	16	21	20	9	11	6
gene:Zm00001d002906	8	11	10	2	0	0	0	0	0	1	1	1	2	0	1	1	0	0	25	22	32	3	1	1	1	0	1	9	2	2	2	2	4	1	0	2
gene:Zm00001d002907	2	0	0	0	0	0	0	0	0	0	0	0	0	0	0	0	0	0	0	0	0	0	0	0	0	0	0	0	0	0	0	0	0	0	0	1
gene:Zm00001d002912	0	0	0	0	0	0	0	0	0	0	0	0	0	0	0	0	0	0	0	0	0	0	0	0	0	0	0	0	0	0	0	0	0	0	0	0
gene:Zm00001d002915	1	0	0	0	0	0	0	0	0	0	0	0	0	0	0	0	0	0	0	0	0	0	0	0	0	0	0	0	0	0	0	0	0	0	0	0
gene:Zm00001d002916	0	0	0	0	0	0	0	0	0	0	0	0	0	0	0	0	0	0	0	0	0	0	0	0	0	0	0	0	0	0	0	0	0	0	0	0
gene:Zm00001d002917	153	169	191	129	293	281	262	387	223	244	227	258	312	356	348	447	520	440	195	165	192	319	306	363	359	75	475	201	245	244	378	362	390	392	333	338
gene:Zm00001d002919	421	372	399	277	574	561	232	319	217	478	392	436	557	556	480	354	351	324	403	395	417	621	634	653	350	78	561	461	522	463	597	619	696	477	410	384
gene:Zm00001d002922	0	0	0	0	0	0	0	0	0	0	0	0	0	0	0	0	0	0	0	0	0	0	0	0	0	0	0	0	0	0	0	0	0	0	0	0
gene:Zm00001d002925	845	880	945	307	797	694	335	478	299	1117	1019	1039	772	891	800	676	684	616	700	662	716	860	818	827	642	142	907	855	1029	1041	887	935	1013	643	655	684
gene:Zm00001d002928	64	59	44	11	29	31	12	11	7	26	25	31	18	25	36	14	14	12	45	41	48	47	40	47	37	10	45	39	24	24	47	44	69	37	34	29
gene:Zm00001d002929	1	2	4	2	1	1	0	0	0	0	1	6	1	1	2	0	0	0	1	2	0	1	1	0	0	0	1	1	1	1	0	1	2	0	1	0
gene:Zm00001d002930	0	0	0	0	0	0	0	0	0	0	0	0	0	0	0	0	0	0	0	0	0	0	0	0	0	0	0	0	0	0	0	0	0	0	0	0
gene:Zm00001d002933	194	186	164	151	471	368	243	411	199	287	259	320	304	387	325	308	369	344	259	269	292	415	401	462	533	97	618	297	372	333	437	432	518	500	431	609
gene:Zm00001d002934	158	112	142	114	276	307	238	388	248	66	67	67	231	216	214	240	292	261	102	95	99	257	272	272	289	90	311	75	63	76	191	195	195	328	271	339
gene:Zm00001d002936	670	655	644	450	1185	1027	512	819	435	765	714	800	999	1119	1031	802	791	878	634	583	612	951	993	1014	869	234	1064	704	807	742	1060	1068	1185	854	802	1024
gene:Zm00001d002937	1	0	0	0	0	0	0	0	0	0	0	0	0	0	0	1	0	0	0	0	0	0	0	0	0	0	0	0	0	0	0	0	0	0	0	0
gene:Zm00001d002938	253	249	258	172	400	386	147	227	122	256	281	255	293	349	337	252	230	222	265	242	286	305	275	307	235	60	321	262	265	243	389	376	383	231	213	263
gene:Zm00001d002939	496	480	532	273	612	483	223	284	188	433	494	442	547	603	583	282	303	251	420	469	489	544	454	527	361	107	384	394	475	428	666	732	744	382	372	391
gene:Zm00001d002940	38	42	43	15	42	26	20	19	13	33	40	43	56	57	43	20	21	19	44	40	34	17	22	16	36	7	43	40	36	42	21	15	26	17	15	23
gene:Zm00001d002941	33	15	20	13	42	34	11	15	18	32	28	39	31	29	43	32	25	20	17	18	19	35	27	44	18	5	11	23	27	21	43	44	55	17	28	26
gene:Zm00001d002942	817	815	830	460	1238	1071	620	831	534	1254	1072	1158	1039	1325	1142	879	931	893	695	677	736	1191	1107	1221	1345	373	1791	914	1188	1193	1244	1249	1502	1160	1014	1352
gene:Zm00001d002943	1143	1013	1101	1219	3148	2916	826	1176	705	1192	1199	1322	2358	2650	2549	1006	976	973	1068	1004	1152	2274	2229	2388	1102	274	1405	1077	1323	1212	2430	2251	2670	1088	934	1025
gene:Zm00001d002944	533	544	558	427	993	908	352	528	314	875	851	949	855	930	907	615	603	577	481	468	506	1035	1041	1062	637	131	899	674	765	869	1085	1016	1201	652	619	614
gene:Zm00001d002945	541	546	624	438	1043	943	521	750	489	753	753	769	814	1006	905	898	840	761	553	489	493	863	842	1036	914	229	1512	632	708	729	983	892	1012	917	857	883
gene:Zm00001d002946	349	350	339	226	607	566	369	451	271	430	423	397	498	583	534	538	466	441	304	342	383	565	527	520	543	126	671	422	500	486	525	531	592	470	476	545
gene:Zm00001d002949	0	0	0	0	0	0	0	0	0	0	0	0	0	0	0	0	0	2	0	0	0	0	0	0	0	0	0	0	0	0	0	0	0	0	0	0
gene:Zm00001d002950	218	203	198	143	423	355	178	292	151	263	247	296	276	271	316	303	358	306	224	219	239	299	292	292	226	58	282	248	264	232	259	292	315	275	233	344
gene:Zm00001d002951	716	616	719	58	141	113	720	1001	598	308	335	326	122	117	119	1192	1247	1121	520	499	590	102	87	88	1014	287	1054	427	248	292	120	143	147	1138	962	1061
gene:Zm00001d002952	4	4	0	2	3	3	1	1	3	1	2	1	1	2	3	2	1	0	3	7	6	2	1	5	4	1	8	7	6	4	4	8	6	4	2	1
gene:Zm00001d002953	283	305	307	248	641	615	166	238	141	330	286	336	465	544	500	260	231	220	274	271	283	545	464	547	238	51	358	243	259	280	540	555	550	262	226	226
gene:Zm00001d002954	13	18	25	31	69	64	19	31	14	20	35	40	51	69	80	82	74	70	20	19	25	74	91	88	52	14	63	27	32	36	106	100	107	45	37	42
gene:Zm00001d002955	0	0	0	0	0	0	0	0	0	0	0	0	0	0	0	0	0	0	0	0	1	0	0	0	0	0	0	0	0	0	0	0	0	0	0	0
gene:Zm00001d002956	1274	1175	1144	971	2430	2213	1148	1706	1081	2145	2020	2057	2216	2573	2407	1837	1795	1839	2166	2064	2152	2113	2054	2196	1733	404	2592	2439	2518	2631	2294	2233	2567	1666	1646	1789
gene:Zm00001d002958	23	20	20	1	3	3	2	5	2	13	19	9	4	3	5	5	5	7	5	4	4	5	2	3	5	1	5	16	36	35	7	8	8	1	1	1
gene:Zm00001d002959	0	0	0	0	0	0	1	0	0	0	0	0	0	0	1	0	0	1	0	0	0	0	0	1	1	1	1	2	0	0	1	0	1	0	0	1
gene:Zm00001d002960	2	1	0	0	0	0	1	0	1	0	2	0	0	0	0	3	0	0	0	0	0	0	0	0	0	0	0	0	0	0	1	1	0	0	0	0
gene:Zm00001d002961	175	164	173	55	175	150	131	195	120	192	169	176	185	201	151	224	212	181	161	145	159	122	130	142	254	59	295	159	157	156	178	166	203	206	175	212
gene:Zm00001d002962	438	419	444	371	990	907	252	357	237	609	627	594	707	808	724	421	443	422	520	508	554	889	817	885	445	110	586	585	732	694	903	817	1030	436	429	526
gene:Zm00001d002964	49	58	41	54	168	115	33	37	28	76	82	90	96	99	86	61	46	56	53	57	67	107	115	99	21	7	12	75	93	90	106	113	123	56	49	56
gene:Zm00001d002965	26	14	31	12	10	12	8	11	5	14	16	15	8	7	16	11	16	9	16	23	30	17	5	12	13	7	11	24	6	5	22	18	11	28	22	13
gene:Zm00001d002966	4	7	3	6	13	13	18	28	14	1	1	1	8	10	12	12	17	6	3	0	2	7	6	3	12	5	18	3	0	1	14	6	12	6	5	8
gene:Zm00001d002967	839	853	841	287	776	655	364	622	361	703	697	665	703	880	717	582	587	565	843	839	863	859	819	858	1071	226	1324	878	863	815	1029	898	957	935	925	1053
gene:Zm00001d002968	2	0	1	6	2	8	0	0	0	1	1	3	7	4	9	0	0	0	0	0	0	4	4	8	0	0	2	1	1	0	8	9	6	1	0	0
gene:Zm00001d002969	68	45	53	34	77	74	31	27	30	80	70	59	57	68	79	41	62	31	41	49	65	92	73	88	70	17	76	66	69	73	61	82	78	57	45	49
gene:Zm00001d002970	3	7	2	13	34	32	1	4	9	8	7	7	67	80	58	5	8	5	1	1	4	60	48	54	30	5	33	5	3	7	88	107	109	18	23	35
gene:Zm00001d002971	1461	1393	1560	972	2285	2215	1315	1855	1169	1557	1559	1489	1757	2081	1956	1798	1814	1703	1285	1218	1324	1961	1926	2080	2068	453	2744	1442	1417	1400	1957	1810	2011	1649	1464	1597
gene:Zm00001d002972	0	0	1	2	2	3	0	0	0	3	2	1	0	1	1	1	1	0	0	1	0	1	0	0	1	0	0	0	0	0	1	3	1	1	0	1
gene:Zm00001d002973	2	1	6	1	5	2	1	2	0	1	3	1	1	0	2	3	1	0	6	2	3	3	2	7	1	1	2	3	1	2	6	3	8	1	1	1
gene:Zm00001d002974	115	135	104	686	1887	1662	1033	1473	820	278	267	291	1382	1549	1509	1487	1490	1337	169	133	176	1519	1464	1535	815	220	986	257	403	354	1624	1658	1677	982	928	923
gene:Zm00001d002975	0	0	1	0	2	1	0	0	0	0	1	0	0	0	0	0	0	0	0	0	0	0	0	0	0	0	0	0	0	0	0	0	0	0	0	0
gene:Zm00001d002976	0	0	0	0	0	0	0	0	0	0	0	0	0	0	0	0	0	0	0	0	0	0	0	0	0	0	0	0	0	0	0	0	0	0	0	0
gene:Zm00001d002977	0	0	0	0	0	0	0	0	0	0	0	0	0	0	0	0	0	0	0	0	0	0	0	0	0	0	0	0	0	0	0	0	0	0	0	0
gene:Zm00001d002978	296	310	304	218	512	437	235	378	208	435	336	399	438	513	445	398	441	370	245	252	310	415	367	387	440	118	531	348	397	423	435	457	507	385	314	383
gene:Zm00001d002979	1	3	3	9	29	18	26	42	24	13	11	12	32	25	25	99	116	98	38	34	37	58	46	64	58	13	53	28	28	30	76	72	80	63	61	52
gene:Zm00001d002980	475	450	494	251	570	605	282	412	220	566	611	609	542	645	615	381	365	389	400	403	453	594	534	593	415	105	492	478	617	664	644	581	674	370	360	349
gene:Zm00001d002982	1	0	0	0	1	0	0	0	0	0	0	0	0	0	0	0	0	0	0	0	0	0	0	0	0	1	0	0	0	0	0	0	0	0	0	0
gene:Zm00001d002984	3	2	3	0	0	0	1	2	2	10	9	7	0	0	0	3	9	8	14	10	16	10	16	6	1	2	5	5	4	3	6	6	7	14	20	10
gene:Zm00001d002987	0	0	0	0	0	0	0	0	0	0	0	0	0	0	0	0	0	0	0	0	0	0	0	0	0	0	0	0	0	0	0	0	0	0	0	0
gene:Zm00001d002988	0	0	0	0	0	0	0	0	0	0	0	0	0	1	0	0	0	0	0	0	0	0	0	0	0	0	0	0	0	0	0	0	0	0	0	0
gene:Zm00001d002989	195	176	208	27	64	75	59	72	48	29	25	17	64	71	82	44	65	39	33	38	43	52	35	57	71	34	119	26	17	24	36	28	35	68	65	62
gene:Zm00001d002990	25	19	17	4	7	3	0	4	3	3	2	4	2	4	3	2	3	0	5	8	8	10	7	8	6	1	19	14	10	1	4	7	6	5	5	3
gene:Zm00001d002991	0	0	0	0	0	0	0	0	0	0	1	0	0	0	0	0	0	0	0	1	0	1	0	0	0	0	0	0	0	0	0	0	0	0	0	2
gene:Zm00001d002992	844	843	865	713	1917	1635	1222	1797	1082	1359	1187	1367	1266	1513	1267	1508	1568	1449	1030	946	983	1347	1349	1429	2690	647	3511	1006	1039	1064	1337	1278	1453	1705	1542	2068
gene:Zm00001d002993	72	73	71	82	228	220	76	133	74	74	77	88	151	172	164	88	117	98	56	53	64	135	139	174	70	17	85	61	72	74	137	142	193	80	94	83
gene:Zm00001d002994	0	0	0	0	0	0	0	0	0	0	0	0	0	0	0	0	0	0	0	0	0	0	0	0	0	0	0	0	0	0	0	0	0	0	0	0
gene:Zm00001d002996	7	10	18	1	0	5	34	37	24	13	10	9	2	0	1	28	38	19	10	8	11	1	5	6	49	17	61	14	5	0	4	3	8	51	67	54
gene:Zm00001d002997	0	0	0	0	0	0	0	0	0	0	0	0	0	0	0	0	0	0	0	0	1	0	0	0	0	0	0	0	0	1	0	0	0	0	0	0
gene:Zm00001d002998	0	0	0	0	0	0	0	0	0	0	0	0	0	0	0	0	0	0	0	0	0	0	0	0	0	0	0	0	0	0	0	0	0	0	0	0
gene:Zm00001d002999	11	11	17	1	4	3	0	1	0	44	46	34	6	6	4	0	1	0	23	26	23	5	3	8	0	1	6	40	56	50	4	10	12	0	0	1
gene:Zm00001d003000	0	0	0	0	0	0	0	0	0	0	0	0	0	0	0	0	0	0	0	0	0	0	0	0	0	0	0	0	0	0	0	0	0	0	0	0
gene:Zm00001d003001	0	0	2	0	0	0	0	0	0	0	0	0	0	0	0	0	1	0	0	0	0	0	0	0	0	0	0	0	0	0	1	0	0	0	0	0
gene:Zm00001d003002	174	134	176	65	156	178	48	84	47	212	196	255	152	188	164	93	79	69	133	142	133	166	152	181	90	20	107	188	211	228	195	149	204	95	92	84
gene:Zm00001d003003	3	9	2	2	3	4	0	2	3	2	4	3	4	2	4	2	4	4	2	6	12	5	4	7	2	2	2	3	3	5	3	8	4	6	2	2
gene:Zm00001d003004	0	1	1	0	1	3	0	1	1	2	1	0	0	1	0	0	0	1	2	0	4	1	0	0	1	0	1	2	0	0	0	2	1	2	1	1
gene:Zm00001d003005	67	53	48	24	29	37	5	5	3	55	58	68	34	38	38	10	3	6	73	64	64	41	34	47	11	0	22	83	102	103	54	32	47	8	16	14
gene:Zm00001d003006	72	79	86	0	4	1	2	4	1	8	4	4	1	0	2	2	2	4	149	167	161	3	1	0	3	0	1	82	16	16	1	1	3	6	9	10
gene:Zm00001d003007	41	29	39	17	39	24	16	23	15	40	56	76	38	48	42	16	29	14	53	63	59	39	38	39	23	4	32	62	55	40	49	41	55	15	27	21
gene:Zm00001d003009	20	35	27	55	139	101	60	73	47	67	85	74	93	114	109	54	67	46	46	45	49	204	160	173	73	16	54	68	95	82	153	168	180	85	75	65
gene:Zm00001d003011	0	0	0	0	0	0	0	0	0	0	0	0	0	0	0	0	0	0	0	0	0	0	0	0	0	0	0	0	0	0	0	0	0	0	0	0
gene:Zm00001d003012	48	51	65	14	28	21	7	14	10	29	33	16	37	54	35	12	24	15	23	22	32	29	29	35	29	3	39	16	33	31	35	68	63	20	31	31
gene:Zm00001d003013	1	1	2	0	0	0	0	0	0	1	0	0	2	0	0	0	0	1	0	0	0	2	1	0	0	0	0	2	3	1	2	1	0	1	0	0
gene:Zm00001d003014	83	95	97	54	152	171	31	59	49	113	114	113	122	144	169	94	96	94	82	87	90	156	148	172	104	19	116	101	92	99	174	163	183	110	85	77
gene:Zm00001d003015	67	70	53	32	62	56	30	61	47	39	46	43	66	88	74	159	175	161	106	116	101	23	30	32	57	23	55	71	14	10	86	91	105	90	78	74
gene:Zm00001d003016	49	48	65	12	11	8	3	6	3	7	6	9	15	13	8	7	8	5	39	34	34	14	17	14	23	0	6	22	37	26	27	23	22	12	12	12
gene:Zm00001d003017	56	75	68	24	60	62	45	92	49	106	75	76	45	58	74	63	81	56	101	124	111	112	91	101	139	31	185	111	98	126	109	113	135	139	111	175
gene:Zm00001d003018	0	0	0	0	0	0	0	0	0	0	0	0	0	0	0	0	0	0	0	0	0	0	0	0	0	0	0	0	0	0	0	0	0	0	0	0
gene:Zm00001d003019	5	1	5	11	10	8	12	16	7	10	5	9	12	9	6	53	54	58	7	4	3	20	37	26	30	3	37	3	7	5	17	15	22	19	18	16
gene:Zm00001d003020	0	0	0	0	1	0	0	1	0	0	0	0	0	0	1	0	0	0	0	0	0	0	0	0	0	0	0	0	0	0	0	0	0	0	0	1
gene:Zm00001d003021	6	6	2	4	16	11	6	13	5	6	4	3	6	7	11	41	39	38	11	4	9	23	20	15	57	6	45	5	9	5	15	17	19	24	19	19
gene:Zm00001d003022	1	1	1	0	0	0	0	0	0	0	0	0	0	0	0	0	0	0	1	0	2	2	0	1	0	0	0	1	0	0	2	0	0	1	0	1
gene:Zm00001d003023	4	4	3	5	21	13	10	23	6	11	12	12	10	17	8	72	42	50	14	4	11	18	30	25	41	8	52	15	7	9	19	15	20	28	24	21
gene:Zm00001d003024	19	12	19	2	9	4	13	11	7	7	6	5	12	5	4	8	10	8	26	22	24	17	13	19	38	10	48	18	9	5	12	19	24	25	28	32
gene:Zm00001d003025	2	0	2	5	24	18	10	13	8	6	3	2	23	39	23	23	17	14	3	1	5	23	13	16	8	3	4	4	5	1	13	21	24	7	4	8
gene:Zm00001d003027	0	0	0	0	0	0	0	0	0	0	0	0	0	0	0	0	0	0	0	0	0	0	0	0	0	0	0	0	0	0	0	0	0	0	0	0
gene:Zm00001d003028	0	0	0	0	0	0	0	0	0	0	0	0	0	0	0	0	0	0	0	0	0	0	0	0	0	0	0	0	0	0	0	0	0	0	0	0
gene:Zm00001d003031	289	268	260	211	534	459	75	123	93	331	299	332	463	634	511	150	150	148	239	248	247	525	466	513	195	38	245	221	259	260	543	460	585	154	145	188
gene:Zm00001d003033	5	11	9	13	37	24	7	2	4	11	12	13	30	28	20	4	2	6	11	5	7	28	17	33	8	3	18	8	9	3	21	20	29	9	6	5
gene:Zm00001d003034	82	87	90	47	89	77	31	56	28	75	56	62	89	90	62	59	58	36	42	49	53	73	76	71	39	11	45	49	54	61	92	70	77	58	36	49
gene:Zm00001d003035	19	19	17	18	39	42	21	18	16	42	27	27	39	55	61	57	74	64	37	30	32	71	78	62	29	8	31	10	18	17	72	105	95	46	37	43
gene:Zm00001d003037	15	24	17	13	24	34	39	48	31	7	12	13	26	26	24	74	73	88	16	11	12	49	31	27	43	14	61	10	19	15	29	29	31	37	39	46
gene:Zm00001d003038	1	2	4	6	6	6	0	1	2	3	4	2	8	8	9	0	2	5	0	1	1	6	3	1	1	0	0	3	2	0	6	6	3	2	3	0
gene:Zm00001d003039	2	1	2	0	0	0	0	0	0	1	0	1	2	0	0	0	1	1	2	0	0	1	1	2	1	0	1	0	2	1	1	1	0	0	1	1
gene:Zm00001d003040	40	29	49	24	80	66	40	65	19	48	37	42	87	60	77	60	39	54	30	30	34	71	44	51	43	8	39	25	42	31	74	72	55	38	38	30
gene:Zm00001d003041	24	18	17	30	55	43	22	38	31	9	6	10	56	49	62	55	46	44	38	31	35	51	36	44	37	8	12	17	15	10	38	39	36	29	21	20
gene:Zm00001d003043	0	4	0	0	0	0	0	0	0	0	0	0	1	0	0	1	0	2	0	0	0	0	0	0	4	0	1	0	0	0	0	0	0	0	0	0
gene:Zm00001d003044	167	184	175	137	362	287	104	149	102	161	144	171	306	428	300	171	191	165	160	153	207	375	288	376	296	47	369	183	171	183	334	323	400	176	149	202
gene:Zm00001d003045	15	15	19	5	23	11	11	13	8	9	13	10	20	22	18	10	14	12	12	12	14	21	9	11	26	4	21	16	8	15	21	16	19	10	15	19
gene:Zm00001d003046	0	0	1	0	0	0	0	0	0	0	0	0	1	0	1	0	0	0	0	0	0	0	0	0	1	0	0	0	0	0	0	0	1	0	0	0
gene:Zm00001d003047	9	8	10	79	166	172	3	3	6	19	12	19	147	170	163	14	15	9	8	7	10	151	148	146	22	4	20	12	17	17	127	121	140	16	14	19
gene:Zm00001d003048	349	360	353	61	119	129	41	46	33	148	129	143	159	196	171	206	213	204	179	160	153	160	105	134	40	9	61	179	171	222	195	194	192	78	60	70
gene:Zm00001d003049	448	479	500	280	652	633	209	311	206	427	423	407	605	726	634	343	320	314	304	356	348	575	562	574	312	81	522	345	381	347	652	619	641	355	339	370
gene:Zm00001d003050	12	8	13	24	53	48	5	4	3	8	17	15	41	43	47	6	3	6	17	14	20	52	52	49	9	1	6	14	7	25	38	44	35	12	5	17
gene:Zm00001d003051	3	12	11	0	3	4	5	5	1	3	1	2	2	1	0	4	5	4	3	1	1	2	2	1	0	1	6	2	3	3	0	2	4	13	5	3
gene:Zm00001d003052	1	2	1	1	1	2	2	2	4	2	1	1	0	3	1	4	5	2	4	6	2	0	4	0	0	0	2	2	2	4	4	1	5	1	7	2
gene:Zm00001d003053	0	0	0	0	0	0	0	0	0	0	0	0	0	0	0	0	0	0	0	0	0	0	0	0	0	0	0	0	0	0	0	0	0	0	0	0
gene:Zm00001d003057	0	0	0	0	0	0	0	0	0	0	0	0	0	0	0	0	0	0	0	0	0	0	0	0	0	0	0	0	0	0	0	0	0	0	0	0
gene:Zm00001d003058	55	52	51	200	497	592	354	495	329	96	104	93	319	373	363	776	819	769	56	59	66	406	353	363	408	113	554	80	109	113	390	339	383	513	469	503
gene:Zm00001d003059	348	310	382	392	947	905	1498	2230	1185	729	702	598	687	856	700	3831	3877	3580	404	434	418	1226	1162	1234	2130	502	2219	593	779	747	1354	1320	1442	2293	2142	2443
gene:Zm00001d003060	0	0	0	0	1	0	0	0	0	0	0	0	0	0	1	0	0	2	0	0	0	2	0	0	0	0	0	0	0	0	0	1	0	0	3	0
gene:Zm00001d003061	0	0	0	0	0	0	0	0	0	0	0	0	0	0	0	0	0	0	0	0	0	0	0	0	0	0	1	0	0	0	0	0	0	0	0	0
gene:Zm00001d003062	3	1	1	2	2	1	3	2	2	2	0	2	2	1	0	0	1	2	0	1	1	1	2	0	2	0	3	0	0	0	3	1	1	0	1	0
gene:Zm00001d003064	12	17	9	13	32	29	11	15	4	10	9	12	45	60	60	18	22	10	33	25	28	44	36	43	22	5	15	25	12	7	57	42	63	19	13	19
gene:Zm00001d003066	217	172	218	203	506	487	175	309	137	255	213	265	459	512	430	296	297	263	202	180	210	425	378	431	395	61	451	213	215	268	492	395	458	310	243	272
gene:Zm00001d003067	32	43	27	41	94	118	32	63	42	68	61	74	94	120	84	60	75	57	58	58	61	74	81	103	71	12	90	77	67	67	80	69	108	55	48	59
gene:Zm00001d003068	18	17	22	48	89	83	61	88	51	5	5	8	39	60	58	103	104	79	20	19	25	114	83	103	90	19	113	14	5	4	39	39	46	44	24	22
gene:Zm00001d003069	0	0	1	0	0	0	1	4	3	0	1	0	0	0	1	1	2	1	1	0	0	1	1	2	3	0	4	0	0	0	1	1	2	1	2	3
gene:Zm00001d003070	0	0	0	0	0	0	0	0	0	0	0	0	0	0	0	0	0	1	0	0	0	0	0	0	0	0	0	0	0	0	0	0	1	0	0	0
gene:Zm00001d003071	133	136	140	84	167	138	84	141	92	130	133	138	178	193	175	151	155	124	164	133	156	207	210	202	218	38	352	135	155	152	195	193	205	187	203	188
gene:Zm00001d003072	89	108	112	23	66	70	24	24	18	92	88	95	78	94	85	35	26	40	64	80	85	71	70	85	69	15	84	97	105	127	111	86	136	75	61	88
gene:Zm00001d003074	0	0	0	0	0	0	0	0	0	0	0	0	0	0	0	0	0	0	0	0	0	0	0	0	0	0	0	0	0	0	0	0	0	0	0	0
gene:Zm00001d003075	0	0	0	0	0	0	0	0	0	0	0	0	0	0	0	0	0	0	0	0	0	0	0	0	0	0	0	0	0	0	0	0	0	0	0	0
gene:Zm00001d003076	147	144	141	119	231	271	115	150	90	215	221	249	239	284	277	177	166	109	155	134	166	210	220	260	202	49	311	164	198	198	243	271	288	187	144	152
gene:Zm00001d003079	0	0	0	0	0	0	0	0	0	0	0	0	0	0	0	0	0	0	0	0	0	0	0	0	0	0	0	0	0	0	0	0	0	0	0	0
gene:Zm00001d003080	0	0	0	0	0	0	0	0	0	0	0	0	0	0	0	0	0	0	0	0	0	0	0	0	0	0	0	0	0	0	0	0	0	0	0	0
gene:Zm00001d003081	2135	2061	2286	1115	2831	2457	1442	2014	1290	2303	2184	2162	1882	2233	2000	2031	2016	1797	2279	2048	2238	3177	3049	3526	3575	814	4086	2302	2397	2442	2689	2749	2875	2465	2493	2021
gene:Zm00001d003082	0	0	0	0	0	0	0	0	1	0	0	0	0	0	0	0	0	0	0	0	0	0	0	0	0	0	0	0	0	0	0	0	1	0	0	0
gene:Zm00001d003083	613	579	633	629	1575	1488	349	495	293	641	568	669	1244	1446	1291	548	599	526	491	478	517	1349	1221	1392	405	79	586	503	542	558	1307	1255	1402	538	512	559
gene:Zm00001d003084	360	350	384	182	520	469	263	351	221	411	367	351	401	509	428	462	384	355	403	408	411	495	454	494	580	135	742	416	498	488	547	493	513	389	419	362
gene:Zm00001d003085	0	0	0	0	0	0	0	0	0	0	0	1	0	0	0	0	0	0	1	0	0	0	1	0	1	0	1	0	1	0	0	0	0	0	0	0
gene:Zm00001d003086	8	6	8	3	5	1	2	3	1	0	2	0	3	2	8	1	1	0	159	98	126	24	20	15	21	4	35	78	46	48	87	53	79	53	28	47
gene:Zm00001d003087	417	378	393	198	453	438	136	186	117	337	284	340	403	429	412	214	262	196	290	261	302	386	386	383	251	51	296	284	314	293	411	360	474	242	254	313
gene:Zm00001d003088	621	592	674	83	171	171	253	304	235	278	292	275	124	156	141	393	389	376	771	683	818	158	138	160	356	98	352	560	327	345	144	147	154	391	310	386
gene:Zm00001d003089	665	661	717	89	216	194	121	146	109	307	274	309	203	243	232	170	168	164	603	522	587	199	225	233	196	53	273	373	231	221	225	238	259	163	159	193
gene:Zm00001d003090	0	0	0	0	0	0	0	0	0	0	0	0	0	0	0	0	0	0	0	0	0	0	0	0	0	0	0	0	0	0	0	0	0	0	0	0
gene:Zm00001d003091	5	4	9	17	22	23	45	65	61	17	12	8	12	29	23	139	119	112	6	5	4	29	28	30	74	34	62	12	11	9	26	23	34	95	98	108
gene:Zm00001d003092	0	0	0	0	0	0	0	0	0	0	0	0	0	0	0	0	0	0	0	0	0	0	0	0	0	0	0	0	0	0	0	0	0	0	0	0
gene:Zm00001d003093	0	0	0	0	0	0	0	0	0	0	0	0	0	0	0	0	0	0	0	0	0	0	0	0	0	0	0	0	0	0	0	0	0	0	0	0
gene:Zm00001d003096	0	0	0	0	0	0	1	0	0	0	0	0	0	0	0	0	0	1	0	0	0	0	0	0	0	0	2	0	0	0	0	0	0	0	0	0
gene:Zm00001d003098	2	0	0	0	0	0	1	1	0	3	0	0	0	1	1	1	1	1	0	1	1	2	1	1	1	0	2	0	2	2	3	0	0	0	3	0
gene:Zm00001d003099	3	6	6	7	14	9	6	8	7	9	4	6	11	12	9	20	31	35	4	1	2	8	2	7	26	5	38	3	0	0	10	5	7	25	18	32
gene:Zm00001d003100	0	0	0	0	0	0	0	0	0	0	0	0	0	0	0	0	0	0	0	0	0	0	1	0	0	0	0	0	0	0	0	0	0	0	0	0
gene:Zm00001d003101	267	268	306	549	1326	1170	553	757	481	294	245	310	1500	1670	1633	798	776	733	316	320	311	1291	1288	1315	878	203	982	356	326	280	1582	1446	1624	1005	901	991
gene:Zm00001d003102	10	11	6	7	29	23	7	8	3	9	12	23	19	18	24	9	16	10	7	5	6	29	22	23	11	4	12	12	7	15	16	15	24	7	11	10
gene:Zm00001d003103	91	101	113	37	75	63	47	53	34	91	67	81	48	59	72	50	36	28	124	109	121	79	57	71	54	11	59	117	138	116	63	74	80	57	40	35
gene:Zm00001d003104	13	14	16	5	18	14	7	8	10	4	9	4	3	8	6	9	10	7	0	6	6	4	3	4	10	0	3	5	2	4	8	10	11	5	6	4
gene:Zm00001d003106	2732	2653	2757	769	1780	1709	882	1277	747	1765	1765	1786	1670	1889	1803	1766	1705	1634	2401	2242	2497	1580	1551	1598	1270	303	1667	1847	1414	1418	2014	1900	2086	1746	1687	1802
gene:Zm00001d003107	1	0	3	0	4	1	0	2	1	0	2	1	0	0	0	1	2	0	0	1	0	0	1	0	2	0	2	0	1	1	1	4	2	1	0	1
gene:Zm00001d003108	39	35	45	25	85	86	33	48	36	49	48	41	43	75	56	38	46	30	41	34	67	86	66	74	93	32	97	60	80	78	63	61	64	62	57	82
gene:Zm00001d003109	282	238	274	152	379	363	244	305	176	268	255	287	295	399	308	351	356	388	247	213	240	372	348	419	426	96	528	248	277	294	309	342	344	326	293	362
gene:Zm00001d003110	33	36	32	5	18	18	4	14	7	28	20	32	21	21	26	76	93	70	9	11	17	47	40	47	31	3	33	17	25	34	56	53	48	33	17	29
gene:Zm00001d003112	1374	1475	1488	2096	5661	5442	3338	5033	2553	3777	3500	3623	4196	5212	4770	4418	4288	3983	2008	2061	2279	5817	5549	6156	4640	1181	5489	3486	4780	5125	5531	5235	5819	5722	5228	6156
gene:Zm00001d003114	371	347	378	375	927	865	533	781	481	266	271	273	781	988	828	1007	1107	1029	294	291	295	749	727	773	718	174	1075	281	291	264	789	694	900	567	534	820
gene:Zm00001d003115	3	2	4	2	7	6	3	6	7	6	3	3	3	11	6	6	9	9	0	0	0	0	0	0	0	0	0	0	0	1	0	0	0	0	1	0
gene:Zm00001d003116	965	965	947	170	435	395	207	305	181	290	321	291	254	322	324	377	428	387	786	742	841	580	477	576	584	155	803	601	374	407	568	547	649	649	629	535
gene:Zm00001d003117	0	0	0	0	1	0	0	0	0	0	0	0	0	0	0	0	0	0	0	0	0	1	1	0	0	0	0	0	0	0	1	0	3	0	0	0
gene:Zm00001d003118	12	18	20	10	18	23	4	8	2	14	16	5	12	17	15	7	9	14	25	22	24	32	26	41	9	4	23	17	23	20	34	22	50	10	11	14
gene:Zm00001d003119	519	495	519	142	310	292	105	196	95	260	247	288	241	269	257	201	205	157	521	479	467	341	335	360	251	51	330	425	282	296	345	347	362	275	259	292
gene:Zm00001d003120	32	1	0	0	1	0	1	0	1	0	0	0	0	0	0	2	1	2	0	1	0	0	2	0	3	1	0	0	0	0	1	0	0	1	2	3
gene:Zm00001d003121	0	0	0	0	0	0	0	0	0	0	0	0	0	0	0	0	0	0	0	0	0	0	0	0	0	0	0	0	0	0	0	0	0	0	0	0
gene:Zm00001d003123	255	241	249	265	652	575	148	207	114	287	242	299	551	673	549	204	227	217	247	257	244	646	591	652	255	67	423	313	418	354	584	557	694	246	187	275
gene:Zm00001d003124	27	26	22	5	23	14	8	6	1	24	25	17	15	17	19	9	4	7	15	21	17	28	11	27	18	7	17	24	34	31	34	23	36	9	13	15
gene:Zm00001d003125	56	53	55	22	53	39	57	109	53	30	46	50	49	63	54	118	108	100	62	61	78	34	49	66	154	35	164	56	39	51	64	60	61	144	140	113
gene:Zm00001d003127	586	588	597	283	754	705	239	340	239	476	445	481	513	648	578	424	404	370	455	435	470	704	659	776	405	87	510	432	449	456	660	685	666	314	372	326
gene:Zm00001d003128	0	0	0	0	0	0	0	0	0	0	0	0	0	0	0	0	0	0	0	0	0	0	0	0	0	0	0	0	0	0	0	0	0	0	0	0
gene:Zm00001d003129	486	515	479	210	498	458	332	439	322	389	408	417	670	763	699	659	652	542	352	350	444	539	536	513	734	188	1010	349	337	342	896	868	991	709	665	613
gene:Zm00001d003131	0	0	0	0	0	0	0	0	0	0	0	0	0	0	0	0	0	0	0	0	0	0	0	0	0	0	1	0	0	0	0	0	0	0	0	0
gene:Zm00001d003132	0	0	0	0	0	0	0	0	0	0	0	0	0	0	0	0	0	0	0	0	0	0	0	0	0	0	0	0	0	0	0	0	0	0	0	0
gene:Zm00001d003134	0	0	0	0	0	0	0	0	0	0	0	0	0	0	0	0	0	0	0	0	0	0	0	0	0	0	0	0	0	0	0	0	0	0	0	0
gene:Zm00001d003135	0	0	0	1	1	0	0	1	0	0	0	0	0	0	0	3	0	1	1	0	0	0	0	1	0	0	0	0	0	0	0	0	0	0	0	1
gene:Zm00001d003136	0	0	0	0	2	0	0	0	0	0	0	0	0	0	0	0	0	0	0	1	0	1	0	0	0	0	0	0	0	0	0	0	0	0	0	0
gene:Zm00001d003138	0	0	0	0	0	0	0	0	0	0	0	0	0	0	0	0	0	0	0	0	0	0	0	0	0	0	0	0	0	0	0	0	0	0	0	0
gene:Zm00001d003139	0	0	0	0	0	0	1	1	2	1	0	0	0	2	0	4	2	1	3	0	1	0	0	0	1	0	3	1	0	0	0	1	0	1	1	0
gene:Zm00001d003140	73	69	72	6	14	21	389	515	313	6	16	10	11	16	17	353	378	342	138	141	161	27	36	34	710	186	752	78	37	35	33	32	52	695	559	678
gene:Zm00001d003141	0	0	0	0	1	0	0	0	0	0	0	0	0	0	0	0	0	0	0	0	0	0	0	0	0	0	0	0	0	0	0	0	0	0	0	0
gene:Zm00001d003142	1	0	2	0	0	1	0	0	0	0	0	0	0	0	0	1	2	0	0	0	1	2	1	1	4	1	4	1	0	2	1	0	2	0	0	5
gene:Zm00001d003143	10	7	5	4	25	16	9	13	3	16	10	11	12	14	16	10	14	17	30	22	27	42	28	32	30	10	32	25	38	20	40	35	19	25	23	35
gene:Zm00001d003144	209	187	240	119	274	286	87	123	71	124	130	140	253	251	242	108	120	105	126	143	174	283	252	289	212	64	241	195	261	289	358	352	380	220	168	180
gene:Zm00001d003145	0	0	0	0	0	0	0	0	0	0	0	0	0	1	0	0	0	0	0	0	0	0	0	0	0	0	0	0	0	0	0	0	0	0	1	0
gene:Zm00001d003146	0	0	0	0	0	0	0	0	0	0	0	0	0	0	0	0	0	0	0	0	0	0	0	0	0	0	0	0	0	0	0	0	0	0	0	0
gene:Zm00001d003147	632	643	652	552	1291	1247	609	868	565	900	822	903	1224	1429	1344	1060	1056	884	646	546	625	1160	1144	1190	631	144	914	692	773	671	1375	1285	1449	838	757	913
gene:Zm00001d003148	128	111	143	52	178	137	62	96	46	178	154	187	125	133	143	103	88	92	128	148	141	186	156	187	126	20	119	162	214	227	213	153	221	114	107	96
gene:Zm00001d003149	16	14	17	18	56	48	11	21	8	15	19	15	32	42	34	16	13	17	15	18	12	38	36	61	30	5	25	16	18	25	54	37	53	13	17	10
gene:Zm00001d003150	0	0	0	0	0	0	0	0	0	0	0	0	0	0	0	0	0	0	0	0	0	0	0	0	0	0	0	0	0	0	0	0	0	0	0	0
gene:Zm00001d003151	1	1	0	0	0	0	1	0	0	0	1	1	0	0	0	0	1	0	1	0	0	1	0	0	3	0	1	0	0	2	0	0	2	0	0	1
gene:Zm00001d003152	0	0	0	0	0	0	0	0	0	0	0	0	0	0	0	0	0	0	0	0	0	0	0	0	0	0	0	0	0	0	0	0	0	0	0	0
gene:Zm00001d003153	0	0	0	0	0	0	0	0	0	0	0	0	0	0	0	0	0	0	0	0	0	0	0	0	0	0	0	0	0	0	0	0	0	0	0	0
gene:Zm00001d003154	0	0	0	0	0	0	0	0	0	0	0	0	0	0	0	0	0	0	0	0	0	0	0	0	0	0	0	0	0	0	0	0	0	0	0	0
gene:Zm00001d003155	7	8	9	5	6	9	6	4	2	10	10	7	7	4	3	10	8	5	4	2	9	5	9	11	8	5	6	13	7	14	9	2	11	17	13	22
gene:Zm00001d003156	0	0	0	0	0	0	0	0	0	0	0	0	0	0	0	0	0	0	0	0	0	0	0	0	0	0	0	0	0	0	0	0	0	0	0	0
gene:Zm00001d003157	76824	74717	76414	10947	26633	24953	42725	63133	34562	86551	83731	88549	27060	31118	29158	72483	71962	67404	69490	63646	69935	23521	22524	24604	74810	18128	82065	68835	73179	71516	31939	31476	35192	77396	69666	71342
gene:Zm00001d003158	0	0	0	0	0	0	0	0	0	0	0	0	0	0	0	0	0	0	0	0	0	0	0	0	0	0	0	0	0	0	0	0	0	0	0	0
gene:Zm00001d003159	260	242	279	116	365	314	101	163	118	342	308	314	248	301	343	227	221	206	260	223	285	307	279	336	303	60	435	286	344	373	333	318	338	228	206	220
gene:Zm00001d003160	0	3	1	1	1	1	1	2	1	1	2	3	1	1	1	1	1	1	1	1	0	0	5	4	0	1	3	4	2	2	4	5	4	1	0	2
gene:Zm00001d003161	4	4	4	8	27	21	0	1	0	15	11	10	26	24	24	0	0	0	4	4	2	23	25	29	0	0	0	3	6	6	14	18	25	0	0	2
gene:Zm00001d003162	2912	2635	2878	952	2041	1991	3064	4602	2746	2724	2789	2616	1536	1955	1660	4569	4791	4407	3024	2886	3253	2362	2062	2345	5757	1612	5998	2769	2600	2563	1935	1979	2323	4958	4312	4209
gene:Zm00001d003163	0	0	0	0	0	0	0	0	0	0	0	0	0	0	0	0	0	0	0	0	0	0	0	0	0	0	0	0	0	0	0	0	0	0	0	0
gene:Zm00001d003164	2	8	4	0	1	0	0	0	1	1	1	3	0	0	0	0	0	0	1	1	1	1	0	2	0	0	0	0	0	0	1	0	2	1	1	1
gene:Zm00001d003166	751	704	660	318	705	661	282	452	262	667	597	710	588	723	721	515	497	411	643	595	645	758	745	825	554	146	923	608	705	682	849	775	907	579	566	642
gene:Zm00001d003167	0	0	0	0	3	0	0	2	4	0	0	0	0	0	0	0	0	0	0	0	0	0	0	0	0	0	1	0	0	0	0	0	0	0	0	1
gene:Zm00001d003168	0	0	0	0	0	0	0	0	0	0	0	0	0	0	0	0	0	0	0	1	0	1	1	0	0	0	0	0	0	0	0	0	0	0	0	0
gene:Zm00001d003169	0	0	0	0	0	0	0	0	0	0	0	0	0	0	0	0	0	0	0	0	0	0	0	0	0	0	0	0	0	0	0	0	0	0	0	0
gene:Zm00001d003172	0	0	0	0	0	0	0	0	0	0	0	0	0	0	0	0	0	0	0	0	0	0	0	0	0	0	0	0	0	0	0	0	0	0	0	0
gene:Zm00001d003173	0	0	0	0	0	0	0	0	0	0	0	0	0	0	0	0	0	0	0	0	0	0	0	0	0	0	0	0	0	0	0	0	0	0	0	0
gene:Zm00001d003174	1	9	5	0	0	1	0	0	3	0	2	0	1	1	1	1	1	4	2	2	6	0	3	5	4	0	5	2	4	2	0	2	4	1	1	1
gene:Zm00001d003175	0	0	0	0	0	0	0	0	0	0	0	0	0	0	0	0	0	0	0	0	0	0	0	0	1	0	0	0	0	0	0	0	0	0	0	0
gene:Zm00001d003176	418	405	461	344	790	725	440	686	388	585	565	605	788	909	789	721	718	676	704	617	698	605	637	634	688	187	860	638	649	586	840	808	881	765	745	704
gene:Zm00001d003179	373	361	368	161	406	355	283	413	241	327	291	328	329	390	377	374	462	381	375	385	391	440	363	444	457	99	748	367	346	350	432	430	467	434	360	425
gene:Zm00001d003180	47	66	62	10	47	41	33	40	21	27	41	43	32	53	57	47	41	39	55	56	46	49	42	63	52	17	92	33	30	43	77	68	51	59	44	71
gene:Zm00001d003181	948	845	970	60	163	140	124	167	100	62	58	54	194	230	223	199	193	205	483	482	581	202	171	202	349	93	301	275	74	79	246	238	263	377	372	356
gene:Zm00001d003182	31	24	22	10	6	16	9	4	5	9	11	11	9	11	9	10	13	5	22	21	21	15	6	15	12	4	16	17	23	21	17	12	17	20	20	13
gene:Zm00001d003183	2	1	2	0	1	0	1	1	0	2	1	0	0	1	2	1	1	0	1	0	0	2	0	2	0	2	0	2	0	0	0	0	1	1	1	0
gene:Zm00001d003184	0	0	0	0	0	0	0	0	0	0	0	1	0	0	0	0	0	0	0	0	0	0	0	0	0	0	0	0	0	0	0	0	0	0	1	0
gene:Zm00001d003185	1	1	3	1	4	2	0	0	0	10	6	14	7	3	6	0	1	7	1	2	2	4	3	1	0	0	2	2	8	4	11	7	5	0	1	2
gene:Zm00001d003186	0	0	0	0	0	0	0	0	0	0	0	0	0	0	0	0	0	0	1	0	0	0	1	2	0	2	0	0	1	1	1	0	4	3	0	0
gene:Zm00001d003187	0	0	0	0	0	1	0	0	0	0	0	0	0	0	0	0	0	0	0	0	0	1	0	0	0	0	0	0	0	0	0	0	0	0	1	0
gene:Zm00001d003188	0	0	0	0	0	0	0	0	0	0	0	0	0	0	0	0	0	0	0	0	3	0	0	0	1	0	0	1	0	0	6	3	7	8	4	4
gene:Zm00001d003189	0	0	0	0	1	0	0	0	0	0	0	0	0	0	0	0	0	0	0	0	0	0	0	0	0	0	0	0	0	0	0	0	0	0	0	0
gene:Zm00001d003190	1	0	0	1	2	1	2	0	1	1	2	5	3	1	3	5	2	2	24	26	23	8	11	16	15	3	14	17	9	7	79	96	85	144	146	155
gene:Zm00001d003191	0	0	0	0	0	0	0	0	0	0	0	0	0	0	0	0	0	0	3	9	6	0	0	0	0	0	1	2	0	0	7	3	3	3	0	2
gene:Zm00001d003192	1	0	0	1	0	2	0	2	0	0	1	1	0	4	3	0	1	0	1	4	1	2	0	1	1	1	1	2	0	0	2	2	2	0	3	1
gene:Zm00001d003193	272	204	256	45	96	91	12	12	6	47	35	29	148	155	132	21	26	20	120	100	125	104	93	100	35	9	50	63	21	29	150	143	178	24	35	38
gene:Zm00001d003194	0	0	0	0	0	0	0	0	0	1	0	0	0	0	0	1	0	0	0	0	0	0	0	0	0	0	0	1	0	0	0	2	0	0	0	0
gene:Zm00001d003195	1978	1746	1946	507	1190	1028	315	429	319	6326	6776	6385	1177	1348	1340	623	613	535	2579	2612	2887	1244	1082	1212	627	197	660	4777	6990	6845	1385	1369	1591	574	506	505
gene:Zm00001d003196	129	134	151	105	248	203	44	57	36	258	230	298	197	221	182	56	60	52	188	184	214	197	186	242	93	25	195	285	382	348	220	185	237	89	69	75
gene:Zm00001d003197	52	48	56	5	10	5	3	7	5	18	12	12	5	17	18	8	11	15	29	17	17	14	14	20	6	1	7	31	25	24	19	21	18	17	7	9
gene:Zm00001d003198	324	335	351	314	744	717	354	598	331	413	421	458	716	888	745	676	725	643	364	351	374	889	875	973	665	152	942	433	552	554	954	816	953	759	734	1030
gene:Zm00001d003199	0	0	0	0	0	0	0	0	0	0	0	0	0	0	0	0	0	0	0	0	0	0	0	0	0	0	0	0	0	0	1	0	0	0	0	0
gene:Zm00001d003200	318	285	275	247	629	568	201	318	164	539	506	583	655	771	707	539	535	457	313	273	286	799	723	781	333	72	455	528	776	805	1049	996	1044	362	347	380
gene:Zm00001d003202	1	1	0	1	0	0	0	0	0	0	1	2	1	2	0	0	0	0	3	1	4	5	5	9	5	1	10	5	7	1	9	6	8	6	6	6
gene:Zm00001d003203	703	700	716	610	1489	1479	861	1382	779	946	895	952	1111	1367	1248	1353	1363	1310	580	571	622	1341	1258	1329	1204	271	1557	824	1135	1036	1355	1210	1335	1400	1247	1625
gene:Zm00001d003205	0	0	0	0	0	0	0	0	0	0	0	0	0	0	0	0	0	0	0	0	0	0	0	0	0	0	0	0	0	0	0	0	0	0	0	0
gene:Zm00001d003207	474	459	538	502	1273	1118	587	905	530	691	669	718	1016	1240	1145	1040	1022	935	452	471	496	1140	1133	1195	947	260	1336	550	716	677	1197	1244	1348	1112	1008	1314
gene:Zm00001d003208	0	0	0	0	0	0	0	0	0	0	0	0	0	0	0	0	0	0	0	0	0	0	0	0	0	0	0	0	0	0	0	0	0	0	0	0
gene:Zm00001d003209	14	17	16	12	34	20	8	12	6	118	128	110	41	34	48	25	27	33	43	53	50	40	44	35	16	6	20	103	175	152	46	50	54	5	10	15
gene:Zm00001d003210	2	6	2	4	4	7	4	4	2	3	3	2	5	6	3	10	4	10	0	0	0	0	0	0	13	1	15	0	0	0	0	0	0	0	0	0
gene:Zm00001d003211	0	0	0	0	0	0	0	0	0	0	0	0	0	0	0	0	0	0	0	0	0	0	0	0	0	0	0	0	0	0	0	0	0	0	0	0
gene:Zm00001d003212	72	67	84	29	79	79	108	140	105	38	36	37	45	64	38	197	213	220	81	95	83	71	56	68	150	40	134	59	34	28	63	49	54	114	108	127
gene:Zm00001d003213	3	7	7	2	3	4	4	1	1	1	5	3	3	1	0	2	2	0	1	5	5	7	5	5	5	2	6	3	4	4	7	10	5	2	9	2
gene:Zm00001d003214	292	319	312	953	2474	2124	1146	1812	991	716	707	787	1916	2471	1954	1877	1942	1851	427	405	495	2551	2390	2752	1924	424	2754	728	988	989	2551	2282	2692	1917	1799	2662
gene:Zm00001d003216	0	0	0	0	1	0	0	0	0	0	0	0	0	0	0	0	0	0	0	0	0	0	0	0	0	0	0	0	0	0	0	0	0	0	0	0
gene:Zm00001d003217	0	0	0	0	0	0	0	0	0	0	0	0	0	0	0	0	0	0	0	0	0	0	0	0	0	0	1	0	0	0	0	0	1	0	0	0
gene:Zm00001d003218	0	0	0	0	0	0	0	0	0	0	0	0	0	0	0	0	0	0	0	0	0	0	0	0	0	0	0	0	0	0	0	0	0	0	0	0
gene:Zm00001d003219	0	0	0	0	0	0	0	0	0	0	0	0	0	0	0	0	0	0	0	0	0	0	0	0	0	0	0	0	0	0	0	0	0	0	0	0
gene:Zm00001d003220	96	87	96	36	82	96	39	60	35	67	75	73	97	98	91	113	109	114	90	92	111	149	122	143	90	26	165	81	45	78	162	124	143	145	119	132
gene:Zm00001d003222	889	874	888	473	1278	1147	788	1318	767	838	817	914	1063	1304	1144	1158	1230	1097	1189	1124	1286	1313	1241	1411	1440	315	2060	1145	1248	1229	1309	1280	1439	1367	1228	1560
gene:Zm00001d003223	163	156	170	66	194	146	124	196	132	162	152	154	131	173	170	198	208	194	194	198	230	168	162	170	284	64	408	170	182	186	175	169	190	219	210	231
gene:Zm00001d003224	93	90	96	50	137	124	70	83	63	102	115	122	137	154	125	74	81	77	121	114	118	124	96	121	70	21	114	107	116	123	151	128	161	114	83	118
gene:Zm00001d003226	57	48	38	28	69	45	34	68	34	21	17	17	64	93	68	32	56	44	67	59	51	71	72	81	49	13	74	49	42	33	69	63	78	56	57	69
gene:Zm00001d003227	10	13	11	8	32	36	2	3	1	16	18	21	34	26	28	4	5	1	6	10	10	30	32	32	0	0	9	13	11	16	40	37	31	2	5	6
gene:Zm00001d003228	11	9	8	5	6	7	4	2	4	5	9	6	6	8	9	3	6	13	7	16	11	11	7	9	15	7	11	9	10	6	8	14	15	24	18	14
gene:Zm00001d003229	2	1	2	1	0	0	0	0	0	1	2	0	2	0	0	0	0	0	1	0	2	2	2	1	0	1	0	0	0	2	2	1	1	4	2	0
gene:Zm00001d003231	0	0	0	0	0	0	0	0	0	0	0	0	0	0	0	0	0	0	0	0	0	0	0	0	0	0	0	0	0	0	0	0	0	0	0	0
gene:Zm00001d003232	0	0	0	0	0	0	0	0	0	0	0	0	0	0	0	0	0	0	0	0	0	0	0	0	0	0	0	0	0	0	0	0	0	0	0	0
gene:Zm00001d003234	0	0	0	0	0	0	0	0	0	0	1	0	0	0	0	0	0	0	0	0	0	0	0	0	0	0	0	0	0	0	0	0	0	0	0	0
gene:Zm00001d003235	0	0	0	0	0	0	0	0	0	0	0	0	0	0	0	0	0	0	0	0	0	0	0	0	0	0	0	0	0	0	0	0	0	0	0	0
gene:Zm00001d003236	0	0	0	0	0	0	0	0	0	0	0	0	0	0	0	0	0	0	0	0	0	0	0	0	0	0	0	0	0	0	0	0	0	0	0	0
gene:Zm00001d003237	0	0	0	0	0	0	0	0	0	0	0	0	0	0	0	0	0	0	0	0	0	0	0	0	0	0	0	0	0	0	0	0	0	0	0	0
gene:Zm00001d003239	0	0	0	0	0	1	0	0	0	0	0	0	0	0	0	0	0	0	0	0	0	0	0	0	0	0	0	0	0	0	0	0	0	0	0	0
gene:Zm00001d003240	0	0	0	0	0	0	0	0	0	0	0	0	0	0	0	0	0	0	0	0	0	1	0	0	0	0	0	0	0	0	0	0	0	0	0	0
gene:Zm00001d003242	352	306	342	130	387	323	117	201	136	496	458	488	375	438	429	252	225	210	436	427	462	424	385	425	288	72	304	555	634	577	447	495	522	246	233	200
gene:Zm00001d003245	68	62	82	35	84	69	46	62	55	55	45	41	71	89	100	88	101	70	80	54	60	83	96	96	39	9	32	58	61	46	116	112	120	78	75	67
gene:Zm00001d003246	87	104	77	42	139	97	43	102	59	111	100	120	83	117	82	71	62	58	70	61	92	115	102	101	61	23	84	110	130	144	79	102	104	84	82	85
gene:Zm00001d003247	123	134	121	1169	2617	2435	720	960	595	1164	1276	1149	3248	3706	3475	947	952	852	228	244	274	2242	1899	2177	604	170	690	918	1622	1573	2663	2645	3044	697	652	720
gene:Zm00001d003248	200	178	183	156	384	370	108	140	82	232	193	216	240	276	235	207	205	188	217	229	251	426	349	394	195	41	202	193	270	242	344	338	392	117	128	118
gene:Zm00001d003249	64	54	53	3	9	12	15	12	7	9	8	9	11	15	14	58	61	51	64	48	53	13	21	13	13	2	24	46	29	23	17	16	18	26	20	11
gene:Zm00001d003250	1309	1325	1241	460	1205	1145	1043	1488	882	948	964	985	742	946	871	1263	1342	1228	1070	919	1059	1104	1008	1103	1579	395	2173	972	999	973	975	942	1118	1407	1386	1371
gene:Zm00001d003251	72	56	62	60	158	138	5	7	2	176	202	186	123	133	149	13	12	9	75	93	80	120	111	153	11	3	14	126	190	170	117	105	120	13	13	14
gene:Zm00001d003252	831	743	803	52	130	118	21	27	18	1459	1365	1407	134	161	154	30	26	31	557	563	577	178	145	182	62	15	83	819	1092	1078	245	199	252	124	115	117
gene:Zm00001d003254	201	205	236	52	118	99	38	47	33	344	296	370	98	117	89	36	55	60	303	308	342	113	128	128	99	18	97	336	386	404	98	102	165	59	73	71
gene:Zm00001d003255	0	0	0	0	0	0	0	0	0	0	0	0	0	0	0	0	0	0	0	0	0	0	0	0	0	0	0	0	0	0	0	0	0	0	0	0
gene:Zm00001d003256	342	354	310	181	490	472	256	370	208	443	427	420	409	475	406	398	359	380	376	346	370	452	471	455	439	104	530	446	448	439	519	515	538	443	410	396
gene:Zm00001d003257	474	483	487	220	607	596	246	418	217	765	680	770	616	616	612	447	476	407	484	390	393	646	574	687	764	191	916	566	691	718	698	770	749	704	697	675
gene:Zm00001d003258	189	201	214	184	387	398	98	149	59	247	214	226	322	380	313	142	115	133	210	185	212	395	341	379	143	34	199	242	279	259	326	320	326	164	128	146
gene:Zm00001d003259	323	273	359	168	453	449	202	318	163	324	343	307	401	476	413	333	340	288	351	302	359	410	383	434	350	77	500	360	423	383	508	478	516	357	346	453
gene:Zm00001d003261	15	23	23	8	33	19	10	17	9	12	18	13	11	26	20	15	9	14	17	12	17	18	10	9	16	3	17	14	9	9	17	19	20	16	15	22
gene:Zm00001d003262	75	75	94	105	279	269	61	98	36	126	119	142	214	254	208	79	98	66	118	145	170	381	345	413	158	31	178	161	195	200	349	371	382	206	183	177
gene:Zm00001d003264	1	1	0	13	33	33	19	13	13	2	4	1	41	47	45	40	18	28	0	6	2	55	33	44	12	3	12	3	2	2	44	46	52	15	16	15
gene:Zm00001d003265	1438	1415	1597	1626	4283	3879	5555	8181	4671	1780	1644	1889	3643	4217	3962	10189	9875	9259	1768	1656	1729	5582	5457	5900	9124	2160	11169	2346	2959	2925	6102	5842	6710	9209	8624	8320
gene:Zm00001d003266	2	4	4	0	2	0	0	2	0	0	2	2	4	6	6	2	3	4	3	1	3	8	9	6	24	9	26	3	9	5	9	12	10	27	35	19
gene:Zm00001d003267	0	0	0	0	0	0	0	0	0	0	0	0	0	0	1	1	0	0	0	0	0	0	0	0	0	0	0	0	0	0	0	0	0	0	0	0
gene:Zm00001d003268	73	64	53	45	139	150	33	30	15	75	40	65	121	112	120	38	46	34	47	40	52	151	141	151	64	8	60	48	62	42	109	115	133	45	46	38
gene:Zm00001d003269	0	0	0	0	0	0	0	0	0	0	0	0	0	0	0	0	0	0	0	0	0	0	0	0	0	0	0	0	0	0	0	0	0	0	0	0
gene:Zm00001d003271	144	143	122	163	363	364	280	339	240	224	247	205	250	339	329	401	430	339	157	157	157	352	275	350	422	132	384	188	222	233	243	280	329	321	278	341
gene:Zm00001d003272	2	1	0	0	0	0	0	0	0	0	1	0	0	1	0	0	0	0	0	0	0	0	0	0	0	0	0	0	0	0	0	0	0	0	0	0
gene:Zm00001d003273	0	0	0	0	0	0	1	0	0	0	0	0	0	0	0	0	0	0	0	0	1	0	0	0	0	0	0	0	0	0	0	0	0	0	0	0
gene:Zm00001d003274	0	0	0	0	0	0	0	0	0	0	0	0	0	0	0	0	0	0	0	0	0	0	0	0	0	0	0	0	0	0	0	0	0	0	0	0
gene:Zm00001d003275	49	50	50	23	57	61	10	27	11	49	54	54	38	39	57	22	16	14	85	89	88	60	61	66	13	5	10	83	88	82	65	61	66	33	36	29
gene:Zm00001d003276	281	214	247	178	378	381	295	361	256	239	286	268	268	320	324	477	440	440	350	347	399	467	366	451	503	135	434	355	341	315	364	426	480	490	420	382
gene:Zm00001d003277	177	180	189	18	68	46	118	146	81	96	127	118	41	38	64	237	254	288	210	193	223	82	72	55	98	27	121	220	183	181	68	75	72	225	216	276
gene:Zm00001d003278	0	0	0	0	0	0	0	0	0	0	0	0	0	0	0	0	0	1	0	0	0	0	0	0	0	0	0	0	0	1	0	0	0	0	0	0
gene:Zm00001d003279	0	0	0	0	0	0	0	0	0	0	0	0	0	0	0	0	0	0	0	0	0	0	0	0	0	0	0	0	0	0	0	0	0	0	0	0
gene:Zm00001d003280	10	18	12	2	5	7	10	16	12	13	6	11	1	10	2	22	23	16	21	16	24	5	13	9	18	4	15	12	12	17	2	8	5	21	18	22
gene:Zm00001d003281	0	0	0	0	0	0	2	0	0	0	1	0	0	0	0	0	0	1	0	1	1	1	3	2	0	0	0	0	1	0	0	1	0	2	2	1
gene:Zm00001d003282	0	0	0	0	0	0	0	0	0	0	0	0	0	0	0	0	0	0	0	0	0	0	0	0	0	0	0	0	0	0	0	0	0	0	0	0
gene:Zm00001d003283	18	24	23	14	35	26	61	56	47	9	14	15	37	50	48	92	54	58	27	22	23	112	103	97	133	40	114	22	14	14	140	145	140	176	150	132
gene:Zm00001d003284	205	213	240	117	291	288	186	243	161	241	237	231	246	320	316	235	254	201	277	212	265	366	345	392	365	90	538	291	294	278	405	377	393	358	308	311
gene:Zm00001d003287	5	7	5	10	17	15	26	46	24	1	4	3	16	17	19	147	150	130	8	13	9	25	25	31	102	23	90	10	10	10	22	16	35	74	61	60
gene:Zm00001d003288	829	784	852	333	761	739	475	693	450	563	546	555	700	769	743	788	794	693	731	707	757	664	610	642	820	192	1072	642	552	560	686	710	812	712	606	683
gene:Zm00001d003289	1	0	0	0	0	0	3	0	1	1	0	0	0	0	0	0	1	0	0	0	0	0	0	0	0	0	1	0	0	1	0	0	0	1	0	0
gene:Zm00001d003290	0	0	0	1	3	1	0	1	1	0	0	0	0	1	0	0	1	0	2	0	0	2	1	0	0	0	0	0	0	1	0	0	0	0	0	0
gene:Zm00001d003291	177	178	175	53	137	103	68	118	68	81	98	97	112	121	111	100	101	78	157	185	135	103	101	97	81	18	113	141	102	102	105	78	126	80	82	77
gene:Zm00001d003292	479	501	505	636	1546	1433	1317	1825	1114	368	298	349	1045	1275	1118	1447	1372	1236	515	483	561	1200	1030	1271	1776	461	2026	435	339	364	1044	1004	1187	1560	1465	1363
gene:Zm00001d003293	0	1	0	1	3	1	1	3	1	2	0	1	2	0	1	0	3	0	0	2	1	0	1	1	4	0	2	1	3	1	0	2	0	0	0	0
gene:Zm00001d003294	7	4	4	11	15	26	6	4	3	6	4	4	13	26	14	6	5	2	3	5	5	18	10	14	7	2	12	6	2	5	10	12	22	2	4	1
gene:Zm00001d003295	0	0	0	0	0	0	0	0	0	0	0	0	0	0	0	0	0	0	0	0	0	0	0	0	0	0	0	0	0	0	0	0	0	0	0	0
gene:Zm00001d003296	1	1	0	0	2	0	0	0	0	0	0	0	1	0	0	0	0	0	0	0	0	1	0	0	0	0	1	0	1	0	0	0	0	0	0	0
gene:Zm00001d003297	2	0	2	0	0	1	0	2	0	0	0	0	1	2	1	1	2	0	1	0	0	0	1	1	2	1	5	1	2	1	2	4	4	0	0	9
gene:Zm00001d003298	0	4	3	0	1	1	1	3	1	1	1	1	0	1	3	6	3	2	0	0	0	2	0	0	0	0	1	0	0	1	0	0	0	0	0	0
gene:Zm00001d003300	1	2	1	0	0	0	0	0	0	4	2	2	0	0	0	1	0	1	0	1	0	0	0	1	1	0	1	1	0	2	2	0	0	0	0	0
gene:Zm00001d003301	2	2	2	4	7	6	11	13	4	8	12	8	28	32	21	22	17	23	29	44	41	67	51	61	35	9	41	42	22	19	77	79	73	75	60	87
gene:Zm00001d003302	227	228	233	118	298	274	143	231	139	252	207	272	280	302	255	204	206	166	208	184	213	291	298	282	239	67	329	260	210	233	331	271	291	240	221	217
gene:Zm00001d003303	0	1	0	0	0	0	0	0	0	0	0	0	0	0	0	0	0	1	0	0	0	0	0	0	0	0	0	0	0	0	0	0	0	0	0	0
gene:Zm00001d003304	14	10	13	2	1	8	2	2	1	6	5	7	6	12	21	2	0	0	24	31	28	10	10	7	15	3	13	16	2	8	9	19	28	20	16	17
gene:Zm00001d003306	1303	1231	1298	854	1896	1774	1168	1589	1058	951	965	905	1392	1586	1516	1910	1860	1696	1606	1440	1673	2076	1758	2143	1636	443	1589	1453	1188	1153	2207	2182	2465	2320	2045	1717
gene:Zm00001d003307	0	0	0	0	0	0	0	0	0	0	0	0	0	0	0	0	0	0	0	0	0	0	0	0	0	0	0	0	0	0	0	0	0	0	0	0
gene:Zm00001d003308	11	6	12	3	11	12	6	2	3	12	11	7	8	5	10	8	4	10	6	13	20	14	8	13	8	0	18	14	6	5	10	7	10	10	5	10
gene:Zm00001d003309	1412	1332	1350	792	2170	1866	1595	2516	1453	1580	1636	1634	2706	3102	3073	2091	2072	1767	805	679	757	1965	1818	1963	1762	427	2026	1080	1487	1406	2284	2262	2371	1870	1635	2023
gene:Zm00001d003310	10	16	26	2	2	7	3	4	3	5	8	6	7	6	6	9	6	6	11	10	7	4	6	11	7	2	7	4	2	3	5	3	9	9	8	5
gene:Zm00001d003311	462	414	458	29	80	66	208	290	193	355	377	362	50	60	46	290	313	236	256	282	298	108	96	96	152	44	112	283	221	197	50	61	67	139	135	112
gene:Zm00001d003312	2	1	2	3	3	2	1	1	1	1	3	1	2	1	1	2	1	2	27	21	35	39	27	34	26	9	34	36	31	30	30	28	34	29	24	34
gene:Zm00001d003313	100	86	84	64	118	82	53	74	48	80	56	68	83	114	104	80	54	74	79	80	68	103	79	105	88	26	112	69	53	62	90	88	96	89	70	88
gene:Zm00001d003314	40	49	51	39	64	58	51	71	54	44	51	41	56	47	58	80	62	48	64	67	80	48	42	62	26	12	34	47	64	45	54	50	61	47	39	45
gene:Zm00001d003315	0	0	0	0	0	0	0	0	0	0	0	0	0	0	0	0	0	0	0	0	0	0	0	0	0	0	0	0	0	0	0	0	0	0	0	0
gene:Zm00001d003316	0	1	0	0	0	0	0	0	0	0	0	0	0	0	0	0	1	0	0	0	0	0	0	0	0	0	0	0	0	0	0	0	0	0	0	0
gene:Zm00001d003317	52	51	52	104	224	205	80	103	79	62	41	58	178	214	177	81	91	83	43	31	29	206	195	228	87	28	87	32	60	50	180	170	190	99	79	62
gene:Zm00001d003319	2	1	3	2	5	5	2	5	2	2	1	1	3	3	3	5	3	4	0	2	1	1	6	6	4	2	10	3	2	3	6	4	3	1	2	8
gene:Zm00001d003320	0	0	0	0	0	0	0	0	0	0	0	0	0	1	0	0	0	0	0	0	0	0	0	0	0	0	0	0	1	0	0	0	0	0	0	0
gene:Zm00001d003321	1	0	0	0	0	0	0	0	0	0	0	0	0	0	0	0	0	0	0	0	0	0	0	0	0	0	0	0	0	0	0	0	0	0	0	1
gene:Zm00001d003322	2	3	0	0	1	2	2	1	1	2	4	1	0	2	1	2	6	1	1	2	2	1	0	0	5	0	3	0	1	1	0	0	0	3	3	3
gene:Zm00001d003324	0	0	0	0	0	0	0	0	0	0	0	0	0	0	0	0	0	0	0	0	0	0	0	0	0	0	0	0	0	0	0	0	0	0	0	0
gene:Zm00001d003328	179	166	155	104	262	230	140	199	142	145	177	160	171	224	239	226	215	172	200	182	187	202	202	244	214	51	310	165	206	187	217	223	258	218	201	197
gene:Zm00001d003329	362	332	349	254	621	547	158	241	150	371	364	351	537	621	541	289	286	250	411	361	352	655	620	705	397	79	506	400	368	424	656	654	777	348	349	409
gene:Zm00001d003331	0	0	1	0	0	0	0	0	0	0	0	0	0	0	0	0	0	0	0	0	1	0	0	0	0	0	0	0	0	0	0	0	0	0	0	0
gene:Zm00001d003332	0	0	0	0	0	0	0	0	0	0	0	0	0	0	0	0	0	0	0	0	0	0	0	0	0	0	0	0	0	0	0	0	0	0	0	0
gene:Zm00001d003333	544	546	548	297	912	801	756	1054	608	252	253	278	730	911	787	1035	1081	972	496	562	532	813	844	851	1152	329	1579	372	260	296	995	913	990	1128	981	1067
gene:Zm00001d003334	66	59	61	55	97	86	61	86	70	50	44	48	76	87	97	107	119	108	63	66	68	99	83	123	123	23	138	76	77	61	120	103	129	95	86	89
gene:Zm00001d003335	0	0	0	0	0	0	0	0	0	0	0	0	0	0	0	0	0	0	0	0	0	0	0	0	0	0	0	0	0	0	0	0	0	0	0	0
gene:Zm00001d003336	0	0	0	0	0	0	0	0	0	0	1	0	0	0	0	0	0	0	0	0	0	0	0	0	0	0	0	0	0	0	0	0	1	0	0	0
gene:Zm00001d003341	0	0	0	0	0	0	0	0	0	0	0	0	0	0	0	0	0	0	0	0	0	0	0	0	0	0	0	0	0	0	0	0	0	0	0	0
gene:Zm00001d003342	0	0	0	0	0	0	0	0	0	0	0	0	0	0	0	0	0	0	0	0	0	0	0	0	0	0	0	0	0	0	0	0	0	0	0	0
gene:Zm00001d003343	0	1	3	0	0	0	1	3	0	0	0	0	1	1	0	0	1	0	1	1	3	1	1	1	5	0	1	0	0	1	0	2	4	3	1	5
gene:Zm00001d003344	0	0	0	0	0	0	0	0	0	0	0	0	0	0	0	0	0	0	0	0	0	0	0	0	0	0	0	0	0	0	0	0	0	0	0	0
gene:Zm00001d003345	47	39	42	19	41	41	18	22	14	47	57	57	30	31	37	32	32	34	56	57	45	34	34	50	37	7	40	55	73	67	74	49	68	41	31	31
gene:Zm00001d003346	53	55	55	22	69	58	82	155	81	62	49	65	59	56	55	151	135	125	65	70	71	58	59	58	142	42	128	81	66	71	65	63	65	137	130	121
gene:Zm00001d003347	103	84	88	72	155	164	43	44	34	117	123	147	142	178	152	56	73	55	67	62	71	157	139	173	56	17	122	94	153	152	183	181	212	90	58	72
gene:Zm00001d003349	73	78	75	10	27	24	12	31	14	56	49	47	21	18	29	19	29	30	42	43	50	36	33	44	45	7	52	55	62	50	25	20	28	28	27	30
gene:Zm00001d003352	95	69	96	60	155	153	67	94	58	114	98	112	170	165	156	210	177	171	51	50	53	229	178	208	106	21	150	52	80	80	227	201	253	115	93	101
gene:Zm00001d003353	0	0	0	0	1	0	1	1	0	2	2	0	1	0	1	15	13	16	0	0	1	0	4	2	6	1	2	3	2	0	0	3	6	3	3	3
gene:Zm00001d003354	50	43	54	21	36	48	30	53	34	45	55	68	47	64	41	48	54	64	52	49	60	38	54	58	51	18	79	67	56	74	53	58	54	55	52	71
gene:Zm00001d003355	0	0	0	2	9	11	5	5	5	2	0	0	3	6	2	44	40	40	1	0	0	15	6	8	15	1	11	1	1	3	8	10	8	14	10	10
gene:Zm00001d003356	19	17	24	98	216	224	198	315	227	72	77	76	235	280	273	1117	1199	1122	39	46	44	385	294	399	342	87	384	99	100	147	469	416	455	213	165	212
gene:Zm00001d003357	0	0	0	0	0	1	0	0	0	0	0	0	0	0	0	0	0	0	0	0	0	0	0	0	0	0	0	0	0	0	0	0	0	0	0	0
gene:Zm00001d003358	82	63	81	206	448	441	155	236	121	516	476	540	610	626	648	478	487	453	178	206	207	378	317	422	187	51	209	484	741	774	570	558	667	147	134	130
gene:Zm00001d003359	2	0	2	3	1	1	4	3	0	3	1	3	1	2	4	2	2	1	4	1	3	4	4	2	1	0	0	3	4	1	2	6	3	1	5	2
gene:Zm00001d003363	2	3	3	1	2	2	2	0	1	1	2	3	3	7	8	3	9	3	0	4	0	0	1	0	1	0	0	4	1	2	3	3	2	0	0	1
gene:Zm00001d003364	0	0	0	0	0	0	0	0	0	0	0	0	0	0	0	0	0	0	0	0	0	0	0	0	0	0	0	0	0	0	0	0	0	0	0	0
gene:Zm00001d003365	0	0	0	0	1	0	1	0	0	1	0	0	0	1	0	12	19	14	2	0	1	2	1	2	3	0	0	0	0	0	0	2	0	3	0	1
gene:Zm00001d003366	15	17	11	7	16	9	9	11	7	12	23	28	11	16	8	8	16	9	0	0	0	0	0	0	0	0	0	0	0	0	0	0	0	0	1	0
gene:Zm00001d003367	0	0	0	0	0	0	0	0	0	0	0	0	0	0	0	0	0	0	1	0	0	0	0	1	0	0	0	0	0	0	0	0	0	1	0	0
gene:Zm00001d003368	0	0	1	0	0	1	0	0	0	0	0	0	0	0	1	0	0	0	1	0	0	0	1	0	2	0	2	0	2	0	0	1	0	1	0	0
gene:Zm00001d003369	194	178	183	177	398	345	327	462	272	152	128	159	327	432	341	465	394	399	199	153	176	299	331	305	431	125	571	153	137	136	348	381	371	422	351	367
gene:Zm00001d003370	0	0	0	0	1	0	0	0	0	0	0	0	0	0	0	0	0	1	0	0	1	0	0	0	1	0	0	0	0	0	1	0	0	0	0	1
gene:Zm00001d003372	86	78	86	52	155	135	49	86	44	92	60	68	67	99	91	78	76	79	91	86	110	138	123	128	71	6	118	82	89	72	122	118	115	102	81	127
gene:Zm00001d003373	928	872	983	634	1623	1573	322	455	247	1258	1157	1362	1570	1835	1625	430	475	449	1024	940	1014	925	889	942	432	102	600	1003	1140	1064	1237	1177	1334	405	390	371
gene:Zm00001d003374	0	0	0	0	0	1	0	0	0	0	0	0	0	0	0	0	0	0	0	1	3	1	1	0	1	0	1	1	0	0	0	0	0	0	0	2
gene:Zm00001d003375	0	0	0	0	0	0	0	0	0	0	0	0	0	0	0	0	0	0	0	0	0	0	0	0	0	0	0	0	0	0	0	0	0	0	0	0
gene:Zm00001d003376	39	38	27	34	96	68	46	103	59	65	48	58	87	101	92	79	73	102	58	51	58	125	111	126	128	31	180	68	84	62	112	116	133	103	98	101
gene:Zm00001d003377	0	0	0	0	0	0	0	0	0	0	0	0	0	0	0	0	0	0	0	0	0	0	0	0	0	0	0	0	0	0	0	0	0	0	0	0
gene:Zm00001d003378	28	24	19	51	140	107	16	12	8	37	37	40	82	110	94	17	21	14	30	16	25	116	106	105	19	4	33	20	34	26	121	112	118	20	17	23
gene:Zm00001d003379	1	2	4	0	0	0	0	0	0	1	0	2	0	0	0	0	0	2	2	3	5	1	0	3	1	0	1	4	1	0	0	2	1	2	2	1
gene:Zm00001d003380	21	24	26	0	0	0	0	0	0	0	0	0	0	1	0	2	1	0	2	3	2	0	0	1	0	0	0	1	0	0	0	0	0	0	1	1
gene:Zm00001d003381	28	27	43	13	43	44	12	12	6	10	29	16	34	42	32	11	14	9	18	9	22	46	35	41	14	6	12	15	9	13	49	68	56	16	13	18
gene:Zm00001d003382	214	224	223	183	493	469	277	435	243	223	272	269	446	582	537	445	455	418	180	214	206	469	474	506	494	102	621	219	280	296	464	417	510	388	327	427
gene:Zm00001d003383	0	0	0	0	0	0	0	0	0	0	0	0	0	0	0	0	0	0	0	0	0	0	0	0	0	0	0	0	0	0	0	0	0	0	0	0
gene:Zm00001d003386	159	138	150	56	108	106	60	102	55	105	116	118	93	119	129	126	137	126	82	89	110	100	107	96	150	44	152	132	112	138	127	103	161	133	126	91
gene:Zm00001d003389	0	0	0	0	0	0	0	0	0	0	0	0	0	0	0	0	0	0	0	0	0	1	0	0	0	0	0	0	0	0	0	0	0	0	0	0
gene:Zm00001d003390	14	11	8	3	5	3	4	4	4	8	10	21	7	5	5	5	0	6	16	21	21	5	0	6	4	0	1	11	9	12	5	10	3	4	3	2
gene:Zm00001d003392	4	4	2	5	8	6	3	4	3	3	1	4	4	8	3	4	4	4	2	7	6	8	8	2	10	2	5	2	3	2	6	9	7	9	3	4
gene:Zm00001d003393	627	676	713	336	845	711	369	614	376	616	656	663	664	781	710	584	589	523	637	586	711	819	670	746	574	174	723	698	734	693	770	745	864	642	568	649
gene:Zm00001d003394	673	713	739	375	914	824	330	470	284	701	638	652	704	833	774	438	465	422	747	671	776	888	793	906	508	141	641	705	774	829	903	905	990	561	482	490
gene:Zm00001d003395	619	676	650	54	147	118	113	140	74	349	360	327	136	166	157	136	161	144	432	455	495	169	126	173	118	32	175	367	265	253	171	160	199	147	132	139
gene:Zm00001d003396	0	0	0	0	0	0	0	0	0	0	0	0	0	0	0	0	0	0	0	0	0	0	0	0	0	0	0	0	0	0	0	0	0	0	0	0
gene:Zm00001d003397	0	0	0	0	0	0	0	0	0	0	0	0	0	0	0	0	0	0	0	0	0	0	0	0	0	0	0	0	0	0	0	0	0	0	0	0
gene:Zm00001d003398	389	356	408	212	482	414	855	1365	788	516	534	562	396	475	472	1130	1161	1019	497	440	523	359	311	385	745	212	858	569	758	821	386	390	377	950	852	915
gene:Zm00001d003399	5	0	5	1	1	2	1	0	3	1	2	4	1	0	2	2	3	1	1	2	1	2	0	2	2	2	0	0	0	3	1	0	2	0	1	1
gene:Zm00001d003400	11	4	10	3	4	2	1	2	0	5	5	8	4	6	4	2	2	1	5	10	2	3	5	6	6	1	10	7	3	4	6	2	4	3	5	7
gene:Zm00001d003401	6936	6772	7575	1774	4307	4112	2189	3106	1850	7531	7269	7350	4483	5056	5013	4421	4403	4156	7593	7034	7805	4198	3836	4425	3170	741	3303	8393	9421	9101	6393	6440	7108	4481	4172	3716
gene:Zm00001d003403	1	0	0	0	0	0	0	0	0	1	0	0	0	0	0	0	0	0	0	0	0	0	0	0	0	0	0	0	0	0	0	0	0	0	0	0
gene:Zm00001d003404	891	839	931	298	762	657	512	655	346	672	618	650	593	746	666	715	705	703	1099	1070	1140	759	658	739	954	270	906	940	856	838	831	813	899	847	706	729
gene:Zm00001d003405	18	14	13	25	33	43	11	19	9	16	16	18	52	54	51	17	34	20	27	31	39	31	36	35	21	8	29	35	17	18	42	36	33	20	29	31
gene:Zm00001d003406	9	6	16	5	9	11	18	25	20	0	0	0	3	9	5	13	9	18	6	2	3	2	4	6	10	3	6	2	1	0	3	3	0	6	9	3
gene:Zm00001d003408	0	1	0	0	0	0	1	0	1	0	0	0	1	1	1	0	0	0	1	0	0	0	0	0	0	1	2	2	1	1	2	1	1	2	1	0
gene:Zm00001d003409	0	1	1	1	1	3	0	2	1	3	1	4	2	3	2	1	3	2	2	2	4	4	3	2	0	1	1	2	2	2	5	3	4	3	3	6
gene:Zm00001d003411	176	194	194	306	692	639	169	262	122	314	297	299	549	648	610	322	333	251	253	241	289	579	543	608	340	85	446	307	414	345	706	675	819	379	342	305
gene:Zm00001d003412	1	0	1	0	0	0	0	0	0	0	0	0	0	1	0	0	0	1	0	0	0	0	0	1	0	0	0	0	0	2	0	0	0	0	0	0
gene:Zm00001d003414	20	25	24	13	28	34	4	12	8	16	18	23	22	19	33	13	13	9	22	18	16	56	35	39	19	6	29	11	16	12	31	26	29	14	18	15
gene:Zm00001d003415	167	177	182	66	155	154	65	108	67	159	149	175	118	170	153	113	122	96	162	147	171	172	161	165	118	34	156	178	210	184	184	187	192	156	143	119
gene:Zm00001d003417	0	0	0	0	0	0	0	0	0	0	0	0	0	0	0	0	0	0	0	0	0	1	0	0	0	0	0	0	0	0	0	0	0	2	0	0
gene:Zm00001d003418	0	0	0	1	0	0	0	0	0	0	0	0	0	0	0	0	0	0	0	0	0	0	0	0	0	0	0	0	0	0	0	0	0	1	0	0
gene:Zm00001d003419	0	0	0	0	0	0	0	0	0	0	0	0	0	1	1	1	0	0	0	0	0	0	0	0	0	0	0	0	0	0	0	1	0	0	1	0
gene:Zm00001d003420	7	2	2	6	16	18	6	3	4	7	5	8	26	24	16	13	14	12	7	6	3	21	21	32	19	3	12	4	10	4	28	26	27	11	12	10
gene:Zm00001d003422	27	15	31	33	59	56	45	67	39	20	11	13	34	50	44	44	28	31	69	48	70	54	60	90	69	19	71	42	12	21	70	49	69	59	59	61
gene:Zm00001d003423	4	9	5	3	22	14	2	1	3	0	4	5	10	9	14	6	2	0	4	2	3	10	14	15	3	1	11	6	4	8	6	10	9	3	4	5
gene:Zm00001d003425	0	0	1	1	5	2	0	0	0	0	0	1	0	2	4	0	0	1	0	1	0	2	7	5	4	1	3	1	0	0	4	1	2	0	1	2
gene:Zm00001d003426	1555	1532	1607	840	2141	1935	1063	1535	967	1736	1571	1732	1810	2119	1746	1584	1679	1561	1624	1523	1659	2166	1978	2350	1616	326	1940	1692	1789	1805	2213	2192	2570	1722	1650	2066
gene:Zm00001d003427	94	86	90	35	93	83	34	47	27	48	47	49	52	64	79	50	39	30	77	79	110	65	78	69	47	10	59	44	41	46	109	78	75	55	43	45
gene:Zm00001d003428	126	114	103	85	176	120	109	133	81	107	108	107	132	125	161	153	162	149	140	112	128	147	142	134	206	40	226	109	104	107	129	156	130	172	192	163
gene:Zm00001d003429	136412	129235	139481	28258	67593	60713	48175	70122	43060	87300	92790	86052	56767	62962	62234	63530	64245	56694	92748	91204	100604	50886	43850	48052	57475	15956	54263	80891	78849	71903	55654	56357	61907	52066	45346	49150
gene:Zm00001d003430	687	644	727	356	904	801	720	1037	613	505	514	578	643	697	655	880	873	804	555	565	596	699	620	729	668	180	967	533	430	432	654	635	755	862	762	789
gene:Zm00001d003431	0	0	0	1	1	4	1	9	1	0	0	1	0	1	2	0	4	1	2	2	2	1	3	5	7	4	9	0	0	0	0	2	2	3	1	4
gene:Zm00001d003432	49	40	38	21	38	45	22	29	12	35	27	28	38	46	36	19	21	17	28	35	32	65	54	72	30	13	35	45	32	40	65	79	80	51	37	41
gene:Zm00001d003434	14	15	15	2	13	15	33	46	31	13	19	10	11	14	9	72	37	68	40	32	38	99	70	99	85	32	141	45	35	38	53	76	76	134	101	121
gene:Zm00001d003435	4	3	6	2	7	4	1	4	1	12	1	5	13	6	5	5	5	2	0	0	0	0	1	0	1	0	0	0	0	0	0	0	0	0	0	0
gene:Zm00001d003436	0	0	0	0	0	0	0	0	0	0	0	0	0	0	0	0	0	0	0	0	0	0	0	0	0	0	0	0	0	0	0	0	0	0	0	0
gene:Zm00001d003438	625	570	643	122	293	270	243	354	223	477	451	476	223	263	277	325	327	290	688	645	740	383	322	387	531	133	513	718	755	677	463	477	479	682	580	560
gene:Zm00001d003439	0	0	0	0	1	1	0	0	0	0	1	2	1	0	0	0	0	0	0	1	0	0	0	0	0	0	0	0	0	0	0	0	0	0	0	0
gene:Zm00001d003443	0	0	0	0	0	0	0	0	0	0	0	0	0	0	0	0	0	0	0	0	0	0	0	0	0	0	0	0	0	0	0	0	0	0	0	0
gene:Zm00001d003445	2	0	2	2	5	0	1	2	1	1	0	1	1	0	2	1	2	2	0	0	0	0	0	0	0	0	0	0	0	0	0	0	1	0	0	0
gene:Zm00001d003446	420	465	487	286	658	625	365	502	317	381	413	377	473	533	545	549	508	489	331	304	367	635	572	679	643	182	789	345	306	270	569	560	634	722	622	586
gene:Zm00001d003447	0	0	0	0	0	0	1	0	0	0	1	0	1	0	1	0	0	1	0	1	0	4	1	0	0	2	3	2	0	0	3	4	2	1	1	3
gene:Zm00001d003448	144	162	137	38	99	97	45	72	39	137	103	136	86	114	108	73	63	62	230	211	242	374	359	428	359	87	452	185	199	192	321	312	392	288	276	357
gene:Zm00001d003451	1	0	0	0	0	0	0	0	0	0	0	0	0	0	0	0	0	0	0	1	0	0	0	0	0	0	0	0	0	0	0	0	0	0	0	0
gene:Zm00001d003452	8	13	12	22	34	35	22	35	25	11	11	18	19	32	42	32	36	32	18	23	16	19	27	14	9	2	13	10	13	14	21	11	24	18	18	29
gene:Zm00001d003457	542	509	541	230	559	451	204	303	192	195	203	218	492	524	523	385	388	369	237	274	300	594	490	592	450	121	393	203	147	134	572	615	684	390	328	319
gene:Zm00001d003459	4780	4574	5002	1658	4084	3851	5222	7466	4526	2924	2846	2896	3018	3600	3357	7934	7887	7378	3735	3634	4008	2859	2485	2781	8302	2026	10881	3079	2408	2298	2836	2800	3087	6395	5716	6120
gene:Zm00001d003460	478	531	518	207	565	516	332	439	245	554	473	501	437	544	458	598	641	578	410	363	456	546	538	569	613	130	760	457	447	460	572	546	654	610	547	628
gene:Zm00001d003462	727	719	688	355	906	815	406	550	333	716	671	668	717	835	829	567	471	494	578	594	676	709	627	768	425	115	623	630	721	692	798	735	850	506	519	520
gene:Zm00001d003463	12	24	16	1	4	1	2	6	1	21	21	30	3	2	4	0	0	3	38	24	29	3	8	5	3	1	4	35	47	50	7	7	6	3	0	1
gene:Zm00001d003464	70	79	91	16	24	30	18	21	11	91	69	84	41	44	45	13	15	22	53	42	61	11	32	32	17	5	23	59	53	56	32	18	31	22	26	23
gene:Zm00001d003468	334	330	357	264	627	549	456	677	359	247	257	261	414	544	482	495	506	394	317	310	352	506	469	496	852	233	870	234	164	150	414	407	474	689	600	669
gene:Zm00001d003469	45	50	43	21	47	54	14	14	12	27	30	41	36	52	40	17	17	20	57	66	73	52	30	47	18	12	23	37	46	42	54	63	76	32	27	26
gene:Zm00001d003470	6707	6486	6686	2212	5425	5290	3159	4554	2735	6577	6278	6563	4774	5575	5118	4424	4308	4076	6682	6217	6612	5002	4782	5369	3956	891	6213	6517	6317	6653	4652	4573	5150	4187	3864	3555
gene:Zm00001d003471	48	51	49	47	99	104	42	49	30	55	53	49	92	101	102	54	61	52	3	4	12	16	13	14	6	1	4	7	7	10	13	17	17	9	6	5
gene:Zm00001d003472	21	23	27	13	22	20	18	26	12	20	22	20	30	26	25	29	21	23	33	16	35	37	35	31	27	10	28	34	34	31	25	32	31	28	24	36
gene:Zm00001d003473	0	0	0	0	0	1	0	0	1	0	2	0	0	1	0	0	0	0	0	1	1	1	0	1	0	1	3	0	0	0	1	1	0	1	0	1
gene:Zm00001d003474	150	151	146	71	171	133	8	13	9	372	373	401	129	152	155	9	12	9	246	223	276	128	131	164	34	13	59	374	548	518	176	159	198	34	30	41
gene:Zm00001d003475	0	0	0	0	0	0	0	0	0	0	0	0	0	0	0	0	0	0	0	0	0	0	0	0	0	0	0	0	0	0	0	0	0	0	0	0
gene:Zm00001d003476	396	436	400	198	538	512	270	416	218	553	545	604	431	621	476	444	450	420	501	507	563	660	602	649	619	178	1023	682	862	938	648	617	691	459	473	543
gene:Zm00001d003477	1516	1397	1525	1347	3040	2777	1977	2897	1592	2170	2235	2279	2473	2770	2625	2586	2730	2435	2225	1978	2165	3027	2775	2926	2242	552	2119	2195	2451	2321	3181	2975	3290	2285	2097	2237
gene:Zm00001d003479	1	1	1	0	2	3	1	2	2	0	1	1	1	0	0	4	2	1	1	3	3	2	3	5	7	2	12	1	0	3	2	2	5	9	4	6
gene:Zm00001d003482	0	0	0	0	0	1	0	0	0	0	3	0	1	0	0	0	0	0	0	2	0	0	0	1	0	0	0	0	0	0	1	1	0	0	0	0
gene:Zm00001d003483	6	9	8	10	24	17	18	24	6	33	42	35	30	30	24	5	3	9	1	4	0	38	38	38	8	3	8	9	14	17	27	32	33	25	18	30
gene:Zm00001d003485	0	0	0	0	0	0	0	0	0	0	1	0	0	0	0	1	1	1	1	1	0	0	0	0	0	0	0	1	0	0	0	0	1	0	0	1
gene:Zm00001d003488	0	0	0	0	0	0	0	0	0	0	0	1	0	0	0	0	0	0	0	0	0	0	0	0	0	0	0	0	0	0	0	0	0	0	0	0
gene:Zm00001d003489	0	0	3	0	4	1	4	0	1	1	0	2	1	0	1	1	1	0	3	2	2	0	1	0	3	0	2	1	0	0	0	0	0	1	0	1
gene:Zm00001d003490	0	0	0	0	0	0	0	0	0	0	0	0	0	0	0	0	0	0	0	0	0	0	0	0	0	0	0	0	0	0	0	0	0	0	0	0
gene:Zm00001d003491	317	309	296	166	432	391	202	323	191	385	331	374	373	519	447	317	355	323	371	356	365	437	422	446	438	115	626	392	414	464	506	443	592	387	333	489
gene:Zm00001d003492	1	1	2	7	18	22	10	10	9	3	5	5	35	26	28	19	21	24	2	2	1	27	30	35	24	11	25	2	4	6	36	32	54	21	9	23
gene:Zm00001d003493	687	683	681	365	966	855	617	919	523	699	648	626	703	824	798	950	1003	929	736	738	835	839	766	850	1105	245	1167	768	883	923	882	823	965	1077	986	852
gene:Zm00001d003494	0	0	0	0	0	0	0	0	0	0	0	0	0	0	0	0	0	0	0	0	0	0	0	0	0	0	0	0	0	0	0	0	0	0	0	0
gene:Zm00001d003495	191	211	214	250	654	615	317	473	303	276	251	254	522	696	548	572	603	523	332	291	313	597	551	633	566	142	701	286	291	305	613	536	681	525	428	629
gene:Zm00001d003496	0	0	0	0	0	0	0	0	0	0	0	0	0	0	0	0	0	0	0	0	0	0	0	0	0	0	0	0	0	0	0	0	0	0	0	0
gene:Zm00001d003497	0	0	0	0	0	0	0	0	0	0	0	0	0	0	0	0	0	0	0	0	0	0	0	0	0	0	0	0	0	0	0	0	0	0	0	0
gene:Zm00001d003499	4	5	5	4	17	11	4	10	8	7	12	9	13	14	13	8	9	4	12	10	8	21	25	26	10	4	10	8	10	9	15	30	27	9	14	13
gene:Zm00001d003500	97	77	83	22	70	68	25	56	26	78	69	80	67	68	70	49	45	42	62	67	73	103	83	100	71	18	55	68	73	95	113	96	77	50	71	69
gene:Zm00001d003501	1	0	2	4	7	2	0	0	0	4	3	2	5	11	2	0	2	4	0	1	3	6	8	10	5	0	12	2	4	2	10	10	20	5	2	3
gene:Zm00001d003502	13	14	18	16	31	40	13	22	13	17	18	24	26	31	35	33	34	26	7	11	13	27	36	41	30	11	33	14	15	16	35	24	45	32	39	30
gene:Zm00001d003504	709	702	756	18	28	45	47	71	51	70	88	74	48	38	36	195	191	185	243	277	315	31	32	32	78	20	149	184	51	52	56	66	74	97	92	101
gene:Zm00001d003505	0	1	1	0	1	1	0	3	2	0	0	1	0	0	0	11	7	7	1	2	1	6	5	2	7	4	2	3	5	3	2	4	2	5	4	9
gene:Zm00001d003508	103	93	106	113	279	274	214	339	164	114	159	117	232	284	283	374	381	337	89	87	95	367	313	391	413	94	408	104	164	153	418	400	434	435	388	404
gene:Zm00001d003509	349	350	341	110	302	268	291	449	253	114	129	93	237	289	266	522	529	475	162	150	163	282	282	315	445	99	566	144	103	105	304	294	338	443	389	441
gene:Zm00001d003510	3	1	4	4	12	10	9	13	12	6	3	3	11	11	6	20	17	15	2	1	3	10	10	11	10	4	12	4	3	3	22	12	15	17	10	17
gene:Zm00001d003511	28	33	36	27	83	65	31	27	19	56	36	62	81	84	63	36	42	35	30	39	35	48	72	70	35	13	39	33	42	26	80	61	60	40	17	24
gene:Zm00001d003512	6696	6437	7056	109	234	238	289	480	271	2026	2110	2162	219	271	230	463	472	420	7858	7131	7741	291	273	277	728	160	906	5249	2423	2286	360	350	355	715	641	818
gene:Zm00001d003513	340	330	374	8	12	13	9	11	10	103	92	120	12	16	7	14	19	14	324	301	389	12	14	11	1	2	4	270	131	113	16	11	9	25	24	21
gene:Zm00001d003514	0	0	0	0	0	0	0	0	0	0	0	0	0	0	0	0	0	0	0	0	0	0	0	0	0	0	0	0	0	0	0	0	0	0	0	0
gene:Zm00001d003515	0	0	0	0	0	0	0	0	0	0	0	0	0	0	0	0	0	0	1	0	0	0	0	0	0	0	0	1	0	0	0	0	0	0	1	0
gene:Zm00001d003516	0	0	1	0	0	0	0	0	0	0	0	0	0	0	0	0	0	0	0	1	2	1	0	0	1	0	2	0	0	1	0	0	0	1	0	0
gene:Zm00001d003517	0	0	0	0	0	0	0	0	0	0	0	0	0	0	0	0	0	0	0	0	0	0	0	0	0	0	0	0	0	0	0	0	0	0	0	0
gene:Zm00001d003518	439	375	422	223	553	512	415	649	395	515	513	563	517	609	559	773	742	667	613	532	528	560	544	580	673	186	895	530	633	580	659	576	671	660	609	604
gene:Zm00001d003519	0	0	0	0	0	0	0	0	0	0	0	0	0	0	0	0	0	0	0	0	0	0	0	0	0	0	0	0	0	0	0	0	0	0	0	0
gene:Zm00001d003520	0	0	0	0	0	0	0	0	0	0	0	0	0	0	0	0	0	0	0	0	0	0	0	0	0	0	0	0	0	0	0	0	0	0	0	0
gene:Zm00001d003521	0	0	0	0	1	2	0	0	1	0	0	0	0	0	0	0	0	0	1	0	0	0	0	0	0	0	0	0	0	0	0	0	2	1	0	0
gene:Zm00001d003522	1	0	0	0	0	0	0	0	0	0	0	0	0	0	0	0	1	0	0	1	2	0	0	0	0	0	0	2	0	0	0	1	0	1	1	0
gene:Zm00001d003523	0	0	0	0	0	0	0	0	0	0	0	0	0	0	0	0	0	0	0	1	0	0	0	0	0	0	0	0	1	0	0	0	0	0	0	0
gene:Zm00001d003524	23	17	18	59	173	180	83	110	66	45	45	33	165	211	213	243	309	275	43	45	62	190	222	256	173	26	179	36	34	32	292	279	307	170	188	176
gene:Zm00001d003525	158	161	146	91	265	215	104	137	93	161	162	178	200	291	235	146	165	143	214	201	217	180	201	217	180	47	275	185	181	171	239	224	302	175	126	230
gene:Zm00001d003529	3	1	1	1	5	2	3	4	4	3	6	2	0	3	3	6	6	12	1	1	2	4	2	4	18	1	12	2	2	5	1	0	1	9	7	14
gene:Zm00001d003530	8	7	16	0	0	2	0	1	0	11	8	9	1	2	3	1	2	0	11	11	14	4	7	7	2	1	0	22	7	17	11	8	7	4	9	6
gene:Zm00001d003531	1	0	2	0	0	0	0	0	0	0	0	0	0	1	0	1	0	0	6	1	7	1	0	2	0	0	1	1	2	0	1	2	2	1	2	0
gene:Zm00001d003533	127	99	111	21	52	33	30	48	32	50	40	55	42	59	62	73	91	67	67	56	83	53	50	52	47	25	75	47	42	39	70	63	57	63	61	64
gene:Zm00001d003534	139	172	153	22	75	75	53	84	69	47	48	57	69	73	83	85	67	83	93	82	80	50	47	68	58	12	89	68	46	43	81	63	78	63	69	65
gene:Zm00001d003535	0	0	0	0	0	0	0	0	0	0	0	0	0	0	0	0	0	0	0	0	0	0	0	0	0	0	0	0	0	0	0	0	0	0	0	0
gene:Zm00001d003538	18	14	13	1	1	0	0	0	1	2	4	6	3	0	2	2	2	5	3	8	12	2	2	1	1	0	2	8	2	11	1	1	5	0	2	0
gene:Zm00001d003539	386	394	359	375	882	803	239	388	242	467	429	500	831	952	855	486	481	440	375	335	381	918	775	1019	616	145	826	403	503	491	807	821	882	552	465	490
gene:Zm00001d003540	320	319	368	109	368	294	228	331	203	345	305	305	241	281	262	332	310	309	373	346	364	369	362	405	424	102	720	386	368	351	330	322	381	375	372	374
gene:Zm00001d003543	2	0	0	6	16	11	0	1	0	3	1	1	12	8	7	3	3	5	1	1	3	20	12	18	5	0	1	1	5	2	12	14	14	5	1	3
gene:Zm00001d003544	1	3	1	0	0	1	0	0	1	1	1	3	2	1	3	1	1	1	3	1	3	4	2	2	1	0	1	1	1	1	6	6	2	4	1	1
gene:Zm00001d003545	0	0	0	0	0	1	0	0	1	0	0	0	0	0	1	0	0	0	0	3	1	1	1	1	0	0	0	1	1	0	3	0	3	1	2	2
gene:Zm00001d003546	89	87	94	49	144	122	43	91	60	88	90	85	121	131	125	78	116	109	121	76	97	148	164	188	143	20	179	105	97	83	127	176	124	89	99	103
gene:Zm00001d003549	9	7	6	3	9	6	8	11	9	1	5	4	11	11	7	5	4	6	6	3	5	4	2	5	7	4	8	8	3	0	10	12	11	10	5	13
gene:Zm00001d003550	0	0	0	0	0	0	0	0	0	0	0	0	0	0	0	0	0	0	0	0	0	0	0	0	0	0	0	0	0	0	0	0	0	0	0	0
gene:Zm00001d003551	0	0	0	0	0	0	0	0	0	0	0	1	0	0	0	0	0	0	0	0	0	0	0	0	0	0	0	0	0	0	0	0	0	0	0	0
gene:Zm00001d003552	2978	2874	3153	1175	2660	2490	2511	3470	2141	2212	2282	2304	1727	2054	1856	3283	3234	2973	2802	2629	2947	1698	1582	1751	3600	904	4289	2478	2277	2361	1373	1389	1644	2605	2333	2197
gene:Zm00001d003553	11	11	11	2	1	2	30	42	25	0	0	0	3	5	3	22	24	16	9	2	5	7	2	4	21	9	28	4	0	1	0	0	1	20	12	24
gene:Zm00001d003554	0	0	0	0	0	0	0	0	0	1	0	0	0	0	0	0	0	0	1	0	1	0	0	0	0	0	0	1	0	0	0	0	0	0	0	0
gene:Zm00001d003555	1	3	1	0	2	7	1	2	2	2	2	2	1	1	2	0	3	3	5	5	2	2	5	3	0	0	6	2	4	6	4	5	2	3	7	2
gene:Zm00001d003556	300	275	282	225	534	518	447	754	413	243	248	249	382	438	428	722	683	664	370	395	370	528	457	611	851	180	1120	334	259	255	495	437	583	729	741	800
gene:Zm00001d003559	2586	2560	2751	510	1213	1176	17094	25901	14531	502	519	555	703	822	699	24621	24570	22893	3776	3504	3906	950	917	988	15526	4077	15493	2110	526	466	845	810	854	23238	20965	21418
gene:Zm00001d003563	2	4	3	1	0	0	41	60	41	4	0	0	1	1	2	120	113	93	4	4	2	0	3	2	41	15	36	0	3	3	2	1	3	89	81	62
gene:Zm00001d003566	61	53	43	28	94	91	48	64	39	67	59	55	65	80	78	72	72	65	58	42	43	85	72	68	93	17	114	63	57	65	76	63	97	67	58	55
gene:Zm00001d003567	0	0	0	0	0	0	0	0	0	0	0	0	0	0	0	0	0	0	0	0	0	0	0	0	1	0	0	0	0	1	0	0	1	0	0	0
gene:Zm00001d003569	1	2	3	1	5	1	1	2	0	3	1	3	3	3	3	1	1	4	0	1	0	5	1	3	7	3	3	2	1	1	1	4	0	3	1	4
gene:Zm00001d003571	0	0	2	0	1	2	0	0	0	0	1	0	4	1	2	0	0	0	0	2	0	3	1	2	3	1	2	1	0	0	4	0	0	0	0	1
gene:Zm00001d003572	464	429	490	244	654	553	436	654	418	628	610	535	595	726	642	1011	1139	1083	583	501	565	661	634	709	821	211	1147	539	538	541	858	774	861	903	843	962
gene:Zm00001d003573	0	0	0	0	0	0	0	0	0	0	0	0	0	0	0	0	0	0	0	0	0	0	0	0	0	0	0	0	0	0	0	0	0	0	0	0
gene:Zm00001d003574	0	0	0	0	0	0	0	0	0	0	0	0	0	0	0	0	0	0	0	0	0	0	0	0	0	0	0	0	0	0	0	0	0	0	0	0
gene:Zm00001d003575	28	27	41	9	16	17	0	0	3	11	3	8	15	21	15	5	7	4	24	20	30	18	14	19	4	1	3	16	10	9	13	22	22	2	4	4
gene:Zm00001d003577	0	0	0	0	0	0	0	0	0	0	0	0	0	0	0	0	0	0	0	0	0	0	0	0	0	0	0	0	0	0	0	0	0	0	0	0
gene:Zm00001d003578	0	0	0	0	0	0	0	0	0	2	0	0	0	0	0	0	0	0	0	0	0	0	0	0	0	0	0	0	0	0	0	0	0	0	0	0
gene:Zm00001d003579	0	0	0	0	0	0	0	0	0	0	0	0	0	0	0	0	0	0	0	0	0	0	0	0	0	0	0	0	0	0	0	0	0	0	0	0
gene:Zm00001d003581	0	0	0	1	0	0	0	0	1	0	0	0	0	0	1	0	0	0	0	0	0	0	0	0	0	0	0	0	0	0	0	0	0	0	0	0
gene:Zm00001d003583	0	0	0	0	0	0	0	0	0	0	0	0	0	0	0	0	0	0	0	0	0	0	0	0	0	0	0	0	0	0	0	0	0	0	0	0
gene:Zm00001d003584	749	754	783	380	1009	851	351	477	281	612	546	565	788	867	894	510	524	474	611	549	597	1400	1178	1412	819	200	1018	545	540	482	1210	1147	1314	524	472	547
gene:Zm00001d003588	1	0	0	0	1	1	2	0	2	0	0	0	0	1	1	1	0	2	0	1	0	0	0	0	1	0	0	0	1	0	1	0	0	2	2	0
gene:Zm00001d003589	938	944	936	336	873	699	317	508	274	777	865	881	567	649	626	352	351	336	706	700	771	706	596	754	649	148	874	723	713	779	801	800	883	547	471	587
gene:Zm00001d003590	308	284	298	126	334	305	123	197	129	260	239	271	314	342	339	197	223	181	252	219	234	307	301	342	293	47	335	245	272	242	316	313	373	234	265	311
gene:Zm00001d003592	0	0	0	0	0	0	0	0	0	0	0	0	0	0	0	0	0	0	0	0	0	0	0	0	0	0	0	0	0	0	0	0	0	0	0	0
gene:Zm00001d003593	2	8	5	11	25	17	13	17	12	4	1	0	9	12	9	24	23	23	1	3	2	21	9	18	14	2	12	3	5	2	14	6	14	6	4	2
gene:Zm00001d003594	0	0	0	0	0	0	0	0	0	0	0	0	0	0	0	0	0	0	0	0	0	0	0	0	0	0	0	0	0	0	0	0	0	0	0	0
gene:Zm00001d003598	79	77	69	13	56	39	14	19	12	22	33	25	30	42	30	30	35	38	12	6	9	51	25	32	58	9	47	16	7	13	28	24	40	41	31	24
gene:Zm00001d003599	0	0	0	0	0	0	0	0	0	0	0	0	0	0	0	0	0	1	0	0	0	0	0	0	0	0	0	0	0	0	0	0	0	0	0	0
gene:Zm00001d003600	0	0	1	0	0	0	0	0	0	0	0	0	0	0	0	0	0	0	0	0	0	0	0	0	1	0	0	0	0	0	0	0	0	0	0	0
gene:Zm00001d003601	3309	3176	3331	907	2407	2129	2160	3173	1856	1367	1347	1408	1936	2371	2118	3793	3950	3441	2416	2250	2385	2983	2721	3005	4248	1027	5510	2090	1565	1490	3180	3096	3487	4881	4376	4847
gene:Zm00001d003602	1759	1675	1667	1957	4741	4547	981	1506	809	5253	4913	5137	4618	5382	4897	1471	1442	1317	1216	1038	1159	2261	2100	2220	1127	275	1462	1562	1794	1791	2313	2108	2443	1312	1178	1308
gene:Zm00001d003603	38	21	35	18	41	43	34	57	24	33	22	22	42	52	47	42	52	40	27	32	36	37	34	33	64	23	57	23	16	19	43	39	63	49	38	33
gene:Zm00001d003604	0	1	0	0	0	0	0	1	0	0	0	1	0	0	0	0	0	0	0	0	0	0	0	0	0	0	0	0	0	0	0	0	0	0	0	0
gene:Zm00001d003605	0	0	0	0	0	0	0	0	0	0	0	0	0	0	0	0	0	0	0	0	0	0	0	0	0	0	0	0	0	0	0	0	0	0	0	0
gene:Zm00001d003606	20	14	12	5	12	11	13	8	10	12	18	14	11	13	12	15	18	21	9	10	10	17	18	14	8	1	11	9	12	11	16	13	14	11	21	19
gene:Zm00001d003607	80	86	82	116	268	218	247	336	193	145	134	150	197	240	219	321	346	300	103	86	102	246	229	221	274	65	349	114	139	157	229	215	214	281	255	310
gene:Zm00001d003610	156	147	158	78	219	162	113	167	104	169	162	200	173	238	158	170	198	158	0	0	0	0	0	0	0	0	0	0	0	0	0	0	0	0	0	0
gene:Zm00001d003611	806	727	792	539	1416	1309	692	1044	577	1023	954	1084	1240	1463	1339	1108	1127	1014	995	957	1068	1531	1355	1626	1345	311	1898	1184	1232	1291	1533	1538	1616	1204	1171	1366
gene:Zm00001d003612	553	553	555	226	550	508	218	367	233	342	315	346	446	515	466	377	387	365	422	407	431	539	521	583	159	37	207	383	359	342	595	537	601	415	364	441
gene:Zm00001d003613	1115	1172	1250	577	1475	1397	705	1050	624	954	868	950	1225	1544	1338	993	1009	988	1175	1080	1152	1404	1425	1537	1385	355	1742	1126	1153	1052	1623	1442	1732	1157	997	1155
gene:Zm00001d003614	14	13	14	12	37	28	20	32	23	10	13	17	26	43	28	21	20	30	31	24	37	58	41	54	33	7	24	22	20	5	47	46	49	33	31	29
gene:Zm00001d003615	1738	1766	1922	1111	2755	2438	5066	7847	4457	1462	1471	1472	2010	2560	2191	5868	5951	5410	2598	2509	2620	2541	2319	2610	8786	2195	10551	2346	2362	2473	2690	2456	2701	9302	8536	8435
gene:Zm00001d003616	1707	1621	1813	1280	3094	2769	1767	2649	1487	2514	2335	2451	2113	2577	2310	1292	1425	1283	2709	2688	2956	3168	2780	3186	3433	988	3574	2899	2997	3027	3177	2932	3518	2381	2107	2694
gene:Zm00001d003617	32	29	26	32	68	45	32	45	29	66	49	47	50	52	44	41	51	45	25	19	35	51	40	44	31	18	53	38	42	41	54	55	49	29	29	29
gene:Zm00001d003618	139	137	152	567	1238	1170	521	832	489	388	407	449	956	1177	1094	959	993	892	200	215	209	1150	1029	1233	718	183	1036	342	490	505	1239	1167	1368	837	794	879
gene:Zm00001d003619	0	0	0	0	0	0	0	0	0	0	0	0	0	0	0	0	0	0	0	0	0	0	0	0	0	0	0	0	0	0	0	0	0	0	0	0
gene:Zm00001d003620	0	0	0	0	0	0	0	0	0	0	5	0	1	0	0	2	0	0	17	24	15	33	24	21	40	11	57	13	21	33	29	22	31	24	16	35
gene:Zm00001d003621	305	301	355	301	774	711	274	443	268	296	282	323	317	395	364	663	659	625	348	356	327	770	697	786	517	129	729	286	277	218	618	614	666	439	418	457
gene:Zm00001d003622	0	0	0	2	0	0	0	0	0	0	0	0	0	0	0	0	0	0	2	1	1	4	5	6	1	0	0	4	2	4	4	10	6	1	4	1
gene:Zm00001d003624	0	0	0	0	0	2	2	3	1	1	1	1	3	2	1	2	4	2	5	1	3	7	2	6	1	0	0	3	2	1	2	6	3	2	2	2
gene:Zm00001d003625	0	0	0	0	0	0	0	0	0	0	0	0	0	0	0	0	0	0	0	0	0	0	0	0	0	0	0	0	0	0	0	0	0	0	0	0
gene:Zm00001d003626	4	4	5	8	18	17	10	8	9	7	5	9	19	17	26	10	16	5	10	4	2	12	16	11	8	3	11	3	8	7	21	11	15	8	7	5
gene:Zm00001d003627	0	0	0	0	0	0	0	0	0	0	0	1	0	0	0	0	0	0	0	0	0	1	0	0	0	0	0	0	1	0	0	0	0	0	0	0
gene:Zm00001d003628	1	0	0	0	0	0	0	0	0	0	0	0	0	0	0	0	4	0	0	0	0	0	0	0	0	0	3	1	0	0	3	2	4	0	0	0
gene:Zm00001d003629	0	0	0	0	0	0	0	0	0	0	0	0	0	0	0	0	0	0	0	0	0	0	0	0	0	0	0	0	0	0	0	0	0	0	0	0
gene:Zm00001d003630	98	129	114	63	141	149	51	83	44	154	129	153	106	129	136	70	83	73	69	92	95	125	121	113	132	33	170	138	175	191	115	113	127	121	95	94
gene:Zm00001d003631	3	3	2	2	0	1	0	0	0	3	1	2	3	1	1	0	0	2	0	3	2	1	1	0	0	0	1	1	0	1	1	2	2	0	0	0
gene:Zm00001d003632	2303	2274	2376	1201	2891	2540	2089	3099	1874	1834	1888	1920	1948	2313	2125	2986	2979	2820	1519	1563	1600	2688	2512	2718	3995	1087	4553	1600	1766	1761	2595	2526	2690	3767	3378	3996
gene:Zm00001d003635	0	0	0	0	0	0	0	0	0	0	0	0	0	0	0	0	0	0	0	0	0	0	0	0	0	0	0	0	1	0	0	0	0	0	0	0
gene:Zm00001d003636	0	0	0	0	0	0	0	0	0	0	0	0	0	0	0	0	0	0	0	0	0	0	0	0	0	0	0	0	0	0	0	0	0	0	0	0
gene:Zm00001d003637	0	0	0	0	0	0	0	0	0	0	0	0	0	0	0	0	0	0	0	0	0	0	0	0	0	0	0	0	0	0	0	0	0	0	0	0
gene:Zm00001d003638	1	0	0	1	0	0	1	1	1	1	1	5	0	1	1	1	1	1	3	6	7	6	6	11	6	0	9	9	6	6	20	13	8	7	7	12
gene:Zm00001d003639	0	0	0	0	0	0	0	0	0	0	0	0	0	1	0	0	0	0	0	0	0	0	0	0	0	0	0	0	0	0	0	0	0	0	0	0
gene:Zm00001d003640	179	187	202	115	267	279	62	78	54	201	229	215	247	273	290	88	89	87	146	169	186	250	233	268	100	19	152	201	249	243	280	277	347	138	95	107
gene:Zm00001d003641	1	0	0	0	0	0	0	1	0	0	0	0	0	0	0	0	0	0	1	2	1	0	0	1	2	1	23	2	4	0	1	1	0	0	2	0
gene:Zm00001d003643	1283	1228	1356	599	1571	1376	548	839	521	1243	1211	1210	1239	1359	1336	972	994	872	1871	1850	1942	2648	2532	2729	1631	364	2538	2169	2361	2314	2402	2344	2621	1936	1908	1974
gene:Zm00001d003644	57	54	51	51	140	97	44	68	36	59	39	57	107	154	131	78	63	68	49	47	63	108	145	135	95	23	138	55	75	85	163	150	171	92	98	139
gene:Zm00001d003645	2	0	0	0	0	0	0	0	0	0	0	1	0	0	0	0	1	0	0	0	0	0	0	2	1	0	1	0	0	0	0	0	0	0	1	1
gene:Zm00001d003646	0	0	0	0	0	0	0	0	0	0	0	0	0	0	0	0	0	0	0	1	0	0	0	0	0	0	0	0	0	0	0	0	0	1	0	0
gene:Zm00001d003648	12	18	17	1	3	4	14	21	12	4	3	3	1	1	2	16	21	19	42	38	28	2	1	3	14	4	26	24	6	6	4	5	7	18	17	21
gene:Zm00001d003649	84	103	102	45	156	127	67	90	54	72	71	79	107	122	132	124	117	120	131	99	108	178	146	167	171	45	234	97	65	66	176	168	188	157	175	247
gene:Zm00001d003650	0	0	0	1	1	0	0	0	0	0	0	1	0	0	0	0	0	0	0	0	1	0	0	0	0	0	0	0	0	0	0	0	0	0	0	0
gene:Zm00001d003651	0	0	0	0	0	0	0	0	0	0	0	0	0	0	0	0	0	0	0	0	0	0	0	0	0	0	0	0	0	0	1	0	0	0	0	0
gene:Zm00001d003652	492	488	452	268	644	599	221	369	221	798	709	776	585	628	578	346	373	340	571	579	582	634	596	644	560	132	808	809	946	983	648	620	828	459	483	606
gene:Zm00001d003653	1334	1310	1434	539	1473	1317	563	871	456	1366	1319	1324	1261	1567	1404	962	987	871	995	953	1072	1464	1305	1551	1396	361	1551	1149	1256	1316	1506	1414	1544	1062	926	895
gene:Zm00001d003654	132	155	135	102	246	260	63	81	71	408	399	426	280	324	304	83	82	84	122	108	118	313	311	359	138	29	216	231	343	364	325	346	372	141	134	109
gene:Zm00001d003655	157	179	146	253	637	548	208	310	212	290	297	319	455	496	477	332	307	302	139	136	154	551	549	571	221	42	308	209	273	264	543	483	564	306	269	348
gene:Zm00001d003656	0	0	0	0	0	0	0	0	0	0	0	0	0	0	0	0	0	0	0	0	0	0	0	0	0	0	0	0	0	0	0	0	0	0	0	0
gene:Zm00001d003657	0	1	0	0	1	1	0	3	1	3	4	2	1	2	3	9	4	4	2	2	2	3	8	3	3	1	2	3	3	1	3	6	3	3	6	1
gene:Zm00001d003658	45	41	51	13	55	27	22	27	14	21	29	32	38	43	31	35	23	17	26	26	37	55	46	34	27	6	55	24	31	27	42	41	31	25	30	22
gene:Zm00001d003659	111	94	95	28	66	66	38	43	24	59	46	60	94	91	92	40	74	67	72	67	86	99	105	110	100	26	98	60	75	63	129	102	141	84	70	77
gene:Zm00001d003660	17	19	22	13	43	43	18	25	16	24	26	17	20	26	30	24	27	26	15	7	15	33	35	39	36	9	38	19	25	22	35	37	43	22	25	22
gene:Zm00001d003661	0	0	0	0	0	0	0	0	0	0	0	4	0	0	0	0	0	0	0	0	0	0	0	0	0	0	0	0	0	0	0	0	0	0	0	0
gene:Zm00001d003662	0	0	0	0	0	0	0	0	0	0	0	0	0	0	0	0	0	0	0	0	0	0	0	0	0	0	0	0	0	0	0	0	0	0	0	0
gene:Zm00001d003663	658	640	637	405	924	833	288	412	241	486	483	471	819	1017	965	415	470	420	484	454	504	1010	899	1029	608	163	983	519	509	543	1127	1074	1295	592	519	541
gene:Zm00001d003664	1099	1019	1122	772	1843	1752	582	805	529	1303	1244	1248	1725	1883	1789	1155	1050	973	720	665	719	2031	1850	2101	1106	249	1618	1009	1280	1234	2165	2118	2395	1222	1103	1227
gene:Zm00001d003666	9	8	9	0	0	1	0	0	0	3	2	0	1	0	0	0	0	1	1	2	2	0	0	0	0	0	0	1	1	0	0	0	0	0	0	0
gene:Zm00001d003667	193	189	182	145	313	325	178	249	161	181	182	155	336	418	379	284	253	248	103	78	90	421	426	481	342	57	570	129	171	170	383	416	476	307	238	250
gene:Zm00001d003668	42	30	33	19	35	25	9	6	9	21	29	32	44	43	38	12	6	14	14	10	11	49	41	40	24	8	29	13	17	17	55	63	59	28	25	34
gene:Zm00001d003669	38	39	29	14	45	43	4	24	13	35	32	33	43	68	54	27	14	18	24	23	33	60	26	48	17	4	8	30	35	28	54	61	47	16	11	17
gene:Zm00001d003670	34	24	31	33	48	43	13	35	12	12	11	12	44	33	45	25	23	15	27	30	34	65	70	72	90	22	59	19	17	18	92	71	90	58	48	87
gene:Zm00001d003671	461	367	431	51	129	101	232	302	185	146	140	142	106	115	116	392	389	339	329	311	334	145	94	142	302	86	285	209	122	110	172	162	180	383	382	356
gene:Zm00001d003672	235	233	251	94	245	212	102	133	91	125	145	115	183	158	190	170	164	126	180	141	175	219	179	231	122	28	155	152	125	123	177	198	209	115	106	98
gene:Zm00001d003673	109	114	129	49	121	123	21	24	20	106	87	122	109	94	116	37	41	28	68	85	73	109	96	103	49	20	81	77	76	58	148	142	159	63	62	67
gene:Zm00001d003674	14	15	14	51	138	118	109	152	88	20	14	17	68	79	68	188	175	140	23	17	23	118	121	129	289	66	356	12	21	23	123	104	128	174	173	230
gene:Zm00001d003675	10	18	14	40	75	91	82	119	84	7	7	13	45	86	70	121	124	98	15	12	13	102	103	111	96	28	158	8	20	13	95	73	91	159	121	192
gene:Zm00001d003676	1272	1178	1358	674	1610	1424	2018	3024	1883	1000	994	998	907	1065	947	2305	2450	2180	981	980	996	1238	1062	1179	2397	701	2460	899	963	869	837	794	911	2435	2097	2634
gene:Zm00001d003677	0	0	0	0	1	0	0	0	0	1	0	0	0	1	0	0	0	1	0	0	1	0	0	0	0	0	0	0	0	0	0	0	0	0	0	0
gene:Zm00001d003678	128	126	130	109	261	231	200	296	171	131	133	142	192	243	184	240	232	254	142	138	135	237	224	285	391	113	487	117	133	168	208	192	242	329	270	382
gene:Zm00001d003679	249	275	246	176	480	380	215	345	200	292	300	313	364	477	392	343	415	394	258	233	228	353	376	396	399	119	584	255	272	318	369	364	430	375	345	429
gene:Zm00001d003680	128	111	112	45	108	114	60	77	44	78	97	81	114	150	114	91	86	97	69	78	74	110	108	121	129	22	169	64	80	79	110	104	125	89	66	47
gene:Zm00001d003682	0	0	0	0	0	0	0	0	0	0	0	0	0	0	0	0	0	0	0	0	0	0	0	0	0	0	0	0	0	0	0	0	0	0	0	0
gene:Zm00001d003683	276	314	305	86	272	217	98	154	76	205	199	219	213	271	226	191	206	140	186	171	206	248	224	254	168	35	162	171	133	156	217	281	251	137	143	122
gene:Zm00001d003684	102	85	109	154	301	289	71	109	56	167	168	190	308	329	326	134	147	83	136	120	152	324	311	347	78	30	97	220	312	278	373	335	409	106	88	121
gene:Zm00001d003685	238	262	282	146	377	352	99	172	87	252	265	248	298	354	333	187	154	171	207	223	217	373	310	325	166	36	218	235	267	251	327	333	354	165	142	160
gene:Zm00001d003689	8	13	13	3	11	8	8	9	5	12	12	10	4	7	11	9	8	4	8	7	9	13	17	14	12	7	5	13	15	12	15	13	14	3	7	8
gene:Zm00001d003690	2	3	4	2	6	3	2	1	0	0	0	4	1	4	6	0	8	1	1	1	0	5	5	2	1	0	4	0	5	2	2	5	3	1	1	1
gene:Zm00001d003691	0	0	21	0	0	0	0	0	0	0	0	0	0	0	0	0	0	0	0	0	0	0	0	0	0	0	0	0	0	0	1	0	1	0	0	0
gene:Zm00001d003693	0	0	1	0	0	0	0	0	0	0	0	0	1	1	0	0	0	0	0	0	0	0	0	0	0	0	0	0	0	0	0	0	1	0	0	0
gene:Zm00001d003695	0	0	0	0	0	0	0	0	0	0	0	0	0	0	0	1	0	0	0	0	0	0	0	0	0	0	0	0	0	0	0	0	0	0	0	1
gene:Zm00001d003696	0	0	0	0	0	0	0	0	0	0	0	0	0	0	0	0	0	0	0	0	0	0	0	0	0	0	0	0	0	0	0	0	0	0	0	0
gene:Zm00001d003698	2	2	1	0	5	7	2	5	2	5	4	6	4	5	5	5	7	1	0	0	0	0	0	0	0	0	0	0	0	0	0	0	0	0	0	0
gene:Zm00001d003699	0	0	0	0	0	0	0	0	0	0	0	0	0	0	0	0	0	0	0	0	0	0	0	0	0	0	0	0	0	0	0	0	0	0	0	0
gene:Zm00001d003701	0	0	0	0	0	0	0	0	0	0	0	0	0	0	0	0	0	0	0	0	0	0	0	0	0	0	0	0	0	0	0	0	0	0	0	0
gene:Zm00001d003702	1	0	2	0	0	0	0	0	0	0	1	0	0	0	1	0	0	0	1	1	2	0	0	2	0	0	0	0	0	3	0	1	0	0	0	0
gene:Zm00001d003703	0	0	0	0	0	0	0	0	0	0	0	0	0	0	0	0	0	0	0	0	0	0	0	0	0	0	0	0	0	0	0	0	0	0	0	0
gene:Zm00001d003705	0	0	0	0	0	0	0	0	0	0	0	0	0	0	0	0	0	0	0	0	0	0	0	0	0	0	0	0	0	0	0	0	0	0	0	0
gene:Zm00001d003706	0	0	0	1	0	0	0	0	0	0	0	0	0	0	0	0	0	0	0	0	0	0	0	0	0	0	0	0	0	0	0	0	0	0	0	0
gene:Zm00001d003707	3	1	0	0	0	0	0	0	0	0	2	0	0	0	0	0	0	0	0	0	0	0	0	0	0	0	0	0	0	0	0	0	0	0	0	0
gene:Zm00001d003709	24	16	9	2	3	1	0	1	1	9	10	13	8	5	12	2	1	0	17	14	20	5	7	8	1	0	0	10	12	14	7	9	10	1	0	2
gene:Zm00001d003710	337	304	295	139	373	324	176	266	158	237	209	235	278	386	300	255	309	269	287	275	281	393	373	477	395	127	643	299	244	257	455	369	460	409	342	415
gene:Zm00001d003712	3863	3747	4032	1125	2710	2392	666	891	615	6663	6886	6585	2514	2878	2857	1658	1737	1540	4128	4298	4636	4593	4027	4543	1699	482	1935	4610	5100	5153	4887	5139	5534	1943	1694	1853
gene:Zm00001d003713	744	784	842	207	587	555	356	533	312	762	759	809	538	630	559	605	564	532	754	728	835	583	601	663	486	118	681	794	877	864	605	624	653	571	509	629
gene:Zm00001d003714	0	0	0	0	0	0	0	0	0	0	0	0	0	0	0	0	0	0	0	0	0	0	0	0	0	0	0	0	0	0	0	0	0	0	0	0
gene:Zm00001d003715	3363	3003	3283	1536	3650	3343	2465	3482	2171	2827	2626	2776	2810	3300	3150	3463	3519	3363	2683	2474	2738	2702	2499	2862	4253	1033	5581	2515	2439	2413	3063	3153	3390	2949	2735	3181
gene:Zm00001d003716	0	1	0	0	0	0	0	0	0	0	0	0	0	0	0	0	0	0	2	0	0	0	0	0	0	0	0	0	0	0	0	0	0	0	0	0
gene:Zm00001d003717	0	0	0	0	0	0	0	0	0	0	0	0	0	0	0	0	0	0	0	0	0	0	0	0	0	0	0	0	0	0	0	0	0	0	0	0
gene:Zm00001d003718	0	0	0	1	1	0	0	1	0	0	0	0	1	1	1	0	0	0	0	0	0	0	1	0	1	0	3	0	0	0	2	1	2	0	0	4
gene:Zm00001d003719	9	6	5	1	1	7	0	0	1	7	4	4	5	9	5	1	0	0	0	3	2	1	1	0	2	0	0	2	0	1	6	7	5	2	0	0
gene:Zm00001d003722	0	0	0	0	0	0	0	0	0	0	0	0	0	0	0	0	0	0	0	0	0	0	0	0	0	0	0	0	0	0	0	0	0	0	0	0
gene:Zm00001d003723	0	0	0	0	0	0	0	0	0	0	0	0	0	0	0	0	0	0	0	0	0	1	0	0	0	0	0	0	0	0	0	0	0	0	0	0
gene:Zm00001d003724	4	0	2	0	5	2	0	0	0	6	2	4	1	2	4	1	0	1	2	4	4	2	4	1	1	0	8	9	4	6	3	4	4	3	2	2
gene:Zm00001d003725	0	0	0	0	0	0	0	0	0	0	0	0	0	0	0	0	0	0	0	0	0	0	1	0	0	0	0	0	0	0	0	0	1	0	0	0
gene:Zm00001d003726	0	0	0	0	0	0	0	0	0	0	0	0	0	0	0	0	0	0	0	0	0	0	0	0	0	0	0	0	0	0	0	0	0	0	0	0
gene:Zm00001d003727	0	0	0	0	0	1	0	0	1	0	0	0	0	0	0	1	2	2	0	0	0	0	1	0	1	0	0	0	1	0	0	0	1	0	0	0
gene:Zm00001d003728	1	3	3	5	4	10	8	14	5	2	2	4	7	16	6	6	11	8	4	4	3	13	9	12	6	3	10	1	2	3	13	18	10	14	5	16
gene:Zm00001d003729	333	367	368	125	348	320	33	56	32	722	739	796	361	380	373	65	72	35	370	369	418	346	271	343	74	24	105	606	808	888	372	350	396	78	55	59
gene:Zm00001d003730	1	1	2	0	0	0	0	0	0	0	0	1	0	0	1	1	1	0	0	1	1	1	1	1	0	0	0	0	0	0	1	1	0	0	1	0
gene:Zm00001d003733	0	0	0	0	0	0	0	0	0	0	0	0	0	0	0	0	0	0	0	0	0	0	0	0	0	0	0	0	0	0	0	0	0	0	0	0
gene:Zm00001d003735	0	0	0	0	0	0	7	0	3	0	0	0	0	0	0	0	0	0	0	8	0	0	0	0	0	0	0	0	0	0	0	0	0	0	0	0
gene:Zm00001d003736	0	0	0	0	0	0	0	0	0	0	0	1	0	0	0	0	0	0	1	0	1	0	0	1	1	0	0	0	0	1	0	1	1	2	0	0
gene:Zm00001d003739	0	0	0	0	0	0	0	0	0	0	0	0	0	0	0	0	0	0	0	0	0	0	0	0	0	0	0	0	0	0	0	0	0	0	0	0
gene:Zm00001d003740	0	0	0	0	0	0	0	0	0	0	0	0	0	0	0	0	0	0	0	0	0	0	0	0	0	0	0	0	0	0	0	0	0	0	0	0
gene:Zm00001d003741	0	0	0	0	0	0	0	0	0	0	0	0	0	0	0	0	0	0	0	0	0	0	0	0	0	0	0	0	0	0	0	0	0	0	0	0
gene:Zm00001d003742	163	153	157	50	113	111	135	246	150	84	75	79	121	135	132	489	548	506	168	163	181	150	152	168	326	72	429	125	72	91	212	227	243	359	358	365
gene:Zm00001d003743	34	40	28	2	8	4	8	12	10	4	3	1	8	6	5	21	19	8	13	14	16	9	7	10	11	4	9	15	5	2	5	6	3	12	8	8
gene:Zm00001d003744	0	0	0	0	0	0	0	0	0	0	0	0	0	0	0	0	0	0	0	0	0	0	0	0	0	0	0	0	0	0	0	0	0	0	0	0
gene:Zm00001d003745	0	0	0	0	0	0	0	0	0	0	0	0	0	0	0	0	0	0	0	0	0	0	0	0	0	0	0	0	0	0	0	0	0	0	0	0
gene:Zm00001d003746	0	0	0	0	0	0	0	0	0	0	0	0	0	0	0	0	0	0	0	0	0	0	0	0	0	0	0	0	0	0	0	0	0	0	0	0
gene:Zm00001d003747	1	0	5	3	0	1	0	1	1	1	0	1	3	5	3	0	4	0	0	0	2	3	3	2	2	1	7	2	3	1	4	1	2	1	0	3
gene:Zm00001d003749	0	0	0	0	0	0	0	0	0	2	0	0	0	1	0	0	0	0	2	0	1	1	1	0	1	0	0	0	0	0	0	0	0	1	0	0
gene:Zm00001d003750	1926	2001	2013	26	34	31	408	593	345	187	195	200	6	19	10	775	762	710	1676	1549	1708	24	31	24	624	133	807	895	124	134	14	19	19	532	484	547
gene:Zm00001d003751	7	8	5	2	5	3	0	0	0	7	3	5	13	8	11	1	0	2	2	6	5	1	1	1	0	1	0	2	2	1	8	6	14	1	2	1
gene:Zm00001d003753	0	2	0	0	0	0	0	0	0	1	0	0	1	0	0	0	0	0	0	0	0	1	1	2	0	0	0	0	0	0	0	0	0	1	0	0
gene:Zm00001d003754	0	0	0	0	0	0	0	0	0	0	0	0	0	0	0	0	0	0	0	0	0	0	0	0	1	0	0	0	0	0	0	0	0	0	1	0
gene:Zm00001d003755	7	6	7	1	10	5	3	1	0	1	10	6	7	10	10	3	1	8	4	4	6	3	9	10	5	3	10	8	6	5	9	5	9	1	5	3
gene:Zm00001d003756	1050	1016	1101	226	556	534	568	879	549	565	602	586	385	451	446	876	874	804	1191	1118	1309	625	553	590	1202	306	1185	941	690	686	571	574	626	810	756	651
gene:Zm00001d003757	157	147	167	2	10	2	0	0	0	53	52	76	21	28	32	2	1	0	107	104	101	32	39	31	29	3	30	101	109	95	100	116	115	22	23	26
gene:Zm00001d003758	12	8	12	10	29	31	12	15	11	11	11	17	30	32	33	41	51	46	0	0	0	1	0	0	0	0	0	0	0	0	0	0	0	0	0	0
gene:Zm00001d003759	0	0	0	0	0	0	0	0	0	0	0	0	0	0	0	0	0	0	0	0	0	0	0	0	0	0	0	0	0	0	0	0	0	0	0	0
gene:Zm00001d003760	8	5	10	1	0	0	0	0	0	3	2	3	3	9	13	0	1	1	10	7	6	7	11	4	4	4	6	11	19	8	28	38	35	5	4	3
gene:Zm00001d003761	0	0	0	0	0	0	0	0	0	0	0	0	0	0	0	0	0	0	0	0	0	0	0	0	0	0	0	0	0	0	0	0	0	0	0	0
gene:Zm00001d003762	0	0	0	0	2	1	0	0	0	0	0	0	0	1	1	0	0	0	0	0	0	1	0	1	2	1	0	0	0	0	0	0	1	1	0	0
gene:Zm00001d003763	3	1	2	3	5	5	3	6	3	2	2	3	2	4	2	7	5	5	8	5	4	4	5	5	13	1	13	4	5	2	9	4	8	4	8	5
gene:Zm00001d003765	11	10	17	13	21	13	5	4	3	8	4	8	9	27	17	5	2	4	17	12	11	28	20	13	6	0	3	11	11	9	21	22	20	6	4	7
gene:Zm00001d003767	59589	58093	67682	9710	24878	22113	20639	28275	16588	57045	57079	53702	21096	24497	24659	31190	30626	28218	53705	51013	57653	32598	26860	31656	30910	8315	23222	58477	67276	64723	34884	36293	37441	29893	26620	25622
gene:Zm00001d003768	0	0	0	0	0	0	0	0	0	0	0	0	0	0	0	0	0	0	1	0	0	2	1	1	1	0	0	1	0	0	0	0	0	0	0	1
gene:Zm00001d003769	2	2	3	2	0	0	1	1	2	1	1	0	1	2	0	0	1	0	0	1	0	1	2	0	2	1	0	2	0	0	2	4	1	1	1	0
gene:Zm00001d003770	4	4	8	13	22	27	8	5	4	10	4	9	27	32	32	3	4	5	8	7	7	25	42	42	8	2	26	9	4	8	25	30	23	5	6	8
gene:Zm00001d003772	0	1	0	0	0	0	0	0	0	0	0	0	0	0	0	0	0	0	0	1	0	0	0	0	0	0	0	0	0	0	0	0	0	0	0	0
gene:Zm00001d003773	664	654	665	735	1644	1543	939	1385	821	867	837	836	1388	1502	1502	1569	1455	1369	939	938	972	1828	1709	1775	1949	465	2330	1009	1145	1126	1834	1700	1917	1753	1553	1853
gene:Zm00001d003774	0	0	0	0	0	0	0	0	0	0	0	0	0	0	0	0	0	0	0	0	0	0	0	0	0	0	0	0	0	0	0	0	0	0	0	0
gene:Zm00001d003775	1	1	5	2	4	2	0	4	1	3	4	1	1	3	6	1	2	4	0	1	4	1	3	9	3	2	2	1	1	3	5	5	6	2	4	3
gene:Zm00001d003776	0	0	0	0	0	0	0	0	0	0	0	0	0	0	0	0	0	0	0	0	0	0	0	0	0	0	0	0	0	0	0	0	0	0	0	0
gene:Zm00001d003777	0	0	0	0	0	0	0	0	0	0	0	0	0	0	0	0	0	0	0	0	0	0	0	0	0	0	1	0	0	0	0	0	0	0	0	0
gene:Zm00001d003778	55	62	52	50	113	139	21	44	24	56	48	65	99	104	107	85	86	63	69	53	70	112	123	117	48	13	86	54	45	50	123	117	111	65	57	82
gene:Zm00001d003779	0	0	0	0	0	0	0	0	0	0	0	0	0	0	0	0	1	0	0	0	0	0	0	0	0	0	0	0	0	0	0	0	0	0	0	0
gene:Zm00001d003780	0	0	0	0	0	0	0	0	0	0	0	0	0	0	0	0	0	0	0	0	0	0	0	0	0	0	0	0	0	0	0	0	0	0	0	0
gene:Zm00001d003781	427	468	456	376	956	839	475	696	396	344	322	307	659	904	769	656	720	636	671	565	674	652	567	613	1106	337	851	487	284	253	697	709	841	634	552	664
gene:Zm00001d003782	0	0	0	0	0	0	0	0	0	0	0	0	0	0	0	0	0	0	0	0	0	0	0	0	0	0	0	0	0	0	0	0	0	0	0	0
gene:Zm00001d003783	0	0	0	0	0	0	0	0	0	0	0	0	0	0	0	0	0	0	0	0	0	0	0	0	0	0	0	0	0	0	0	0	0	0	0	0
gene:Zm00001d003784	124	122	128	71	158	159	114	131	96	58	48	58	97	121	112	163	158	165	95	93	90	139	136	139	283	80	365	110	105	110	146	154	155	172	185	214
gene:Zm00001d003785	33	31	34	16	34	34	20	28	23	34	22	30	21	56	24	47	36	40	60	46	37	61	56	58	86	25	111	52	42	43	35	47	60	40	42	71
gene:Zm00001d003786	11	9	12	15	45	27	25	43	16	12	6	1	32	57	34	23	31	23	29	28	31	46	59	62	60	11	53	16	12	13	32	46	50	37	31	57
gene:Zm00001d003788	0	0	0	0	0	0	0	0	0	0	0	0	0	0	0	0	0	0	0	0	0	0	0	0	0	0	0	0	0	0	0	0	0	0	0	0
gene:Zm00001d003789	0	0	0	0	0	0	0	0	0	0	0	0	0	0	0	0	0	0	0	0	0	0	0	0	0	0	0	0	0	0	0	0	0	0	0	0
gene:Zm00001d003790	10	5	5	7	12	15	8	11	6	9	14	9	9	13	4	17	11	14	6	1	4	22	15	13	13	7	34	5	8	16	18	11	8	26	15	24
gene:Zm00001d003791	0	0	0	0	0	0	0	1	0	0	0	0	0	0	0	0	0	0	0	0	0	0	0	0	0	0	0	0	0	0	0	0	0	0	0	0
gene:Zm00001d003792	0	0	0	0	0	0	0	0	0	0	0	0	0	0	0	0	0	0	0	0	0	0	0	0	0	0	0	0	0	0	0	0	0	0	0	0
gene:Zm00001d003793	2	5	2	4	4	10	3	2	5	6	8	3	1	1	1	6	5	4	1	0	1	1	4	0	0	0	1	0	0	3	0	4	2	0	1	1
gene:Zm00001d003794	9	5	7	3	9	11	9	12	7	2	6	5	12	16	12	16	12	21	12	8	4	26	8	15	15	1	23	10	9	5	16	12	11	12	17	19
gene:Zm00001d003796	0	0	0	0	0	28	0	0	0	0	0	0	1	0	0	0	0	0	0	1	0	1	0	0	0	0	0	0	0	0	1	1	0	0	0	0
gene:Zm00001d003797	47	58	54	30	65	48	20	32	21	44	35	32	62	33	72	32	45	33	55	50	54	49	33	36	27	6	17	46	45	49	58	38	44	39	27	40
gene:Zm00001d003799	0	0	0	0	0	0	0	0	0	0	0	0	0	0	0	0	0	0	0	0	0	0	0	0	0	0	0	0	0	0	0	0	0	0	0	0
gene:Zm00001d003800	360	351	386	106	249	237	131	193	108	380	381	338	167	222	218	130	142	112	577	563	619	201	215	238	236	64	212	522	462	486	204	190	220	230	186	211
gene:Zm00001d003801	0	0	0	0	0	0	0	0	0	0	0	0	0	0	0	0	0	0	0	0	0	0	0	0	0	0	0	0	0	0	0	0	0	0	0	0
gene:Zm00001d003804	0	0	0	0	0	0	0	0	0	0	0	0	0	0	0	0	0	0	0	0	0	0	0	0	0	0	0	0	0	0	0	0	0	0	0	0
gene:Zm00001d003806	0	0	0	0	0	0	0	0	0	0	0	0	0	0	0	0	0	0	0	0	0	0	0	0	0	0	0	0	0	0	0	0	0	0	0	0
gene:Zm00001d003807	269	288	275	141	402	344	314	528	338	288	252	229	308	389	302	507	562	518	331	305	332	352	324	389	617	135	883	321	297	251	381	350	375	600	514	596
gene:Zm00001d003808	0	0	0	0	0	0	0	0	0	0	0	0	0	0	0	0	0	0	0	0	0	0	0	0	0	0	0	0	0	0	0	0	0	0	0	0
gene:Zm00001d003809	0	0	2	0	0	0	0	0	0	0	0	3	0	0	0	0	0	0	0	0	2	0	0	0	0	0	0	0	0	13	0	0	0	1	0	0
gene:Zm00001d003810	0	0	0	0	0	0	0	0	0	0	0	0	0	0	0	0	0	0	0	0	0	0	0	0	0	0	0	0	0	0	0	0	0	0	0	0
gene:Zm00001d003811	0	0	0	0	0	0	0	0	0	0	0	0	0	0	0	0	0	0	0	0	0	0	0	0	0	0	0	0	0	0	0	0	0	0	0	0
gene:Zm00001d003812	349	338	340	205	405	420	147	242	114	427	399	367	398	476	384	168	171	156	485	437	453	486	401	489	218	67	328	465	454	466	437	424	487	225	197	193
gene:Zm00001d003813	257	246	232	191	511	480	218	299	175	329	285	304	401	482	414	301	345	277	266	269	316	457	400	472	362	72	463	340	321	351	416	420	459	333	278	362
gene:Zm00001d003814	5	4	7	1	5	1	1	6	0	6	5	4	3	6	4	3	5	7	0	0	0	0	0	0	0	0	0	0	0	0	0	0	0	0	0	0
gene:Zm00001d003817	23387	22918	24322	2947	7929	6991	3886	6098	3472	16697	15951	17107	6526	7460	7371	6371	6421	5787	21967	19937	21528	4538	4408	4669	4706	1158	5475	17407	13885	12420	5896	5582	6092	6758	6154	7670
gene:Zm00001d003818	0	0	0	1	1	2	0	0	0	0	0	0	0	1	0	1	0	1	0	0	0	0	0	0	0	0	0	0	0	0	0	0	0	0	0	0
gene:Zm00001d003819	0	0	0	0	0	0	0	0	0	0	0	0	0	0	1	1	0	0	0	0	0	1	1	0	0	0	1	0	0	1	0	0	0	0	0	0
gene:Zm00001d003820	0	0	2	1	0	0	0	8	2	0	0	0	0	0	0	0	0	1	0	0	0	0	0	0	0	0	0	0	0	0	0	0	0	0	0	0
gene:Zm00001d003822	162	167	170	113	276	215	72	108	75	200	186	197	220	222	235	125	138	130	201	181	184	296	273	283	170	46	276	208	225	240	263	296	310	155	154	135
gene:Zm00001d003823	0	0	0	0	0	0	0	0	0	0	0	0	0	0	0	0	0	0	0	0	0	0	0	0	0	0	0	0	0	0	0	0	0	0	0	0
gene:Zm00001d003824	0	0	0	0	0	0	0	0	0	0	0	0	0	0	0	0	0	0	0	0	0	0	0	0	0	0	0	0	0	0	0	0	0	0	0	0
gene:Zm00001d003825	0	0	0	0	0	0	0	0	0	0	0	0	0	0	0	0	0	0	0	0	0	0	0	0	0	0	0	0	0	0	0	0	0	0	0	0
gene:Zm00001d003826	0	0	0	0	0	0	0	0	0	0	0	0	0	0	0	0	0	0	0	0	0	0	0	0	0	0	0	0	0	0	0	0	0	0	0	0
gene:Zm00001d003828	0	0	0	0	0	0	0	0	0	0	0	0	0	0	0	0	0	0	0	0	0	0	0	0	0	0	0	0	0	0	0	0	0	0	0	0
gene:Zm00001d003829	0	1	2	2	6	1	0	0	1	0	0	1	2	1	4	2	1	0	1	0	1	5	4	3	1	1	2	0	1	0	4	5	3	2	3	0
gene:Zm00001d003830	77	82	79	15	28	30	19	19	9	73	70	63	30	38	45	44	43	29	76	75	75	40	24	35	20	8	19	79	61	75	54	47	56	32	32	14
gene:Zm00001d003833	86	81	76	103	197	203	52	85	46	233	207	222	180	190	172	143	155	128	104	116	148	418	394	411	371	106	417	147	250	225	527	468	569	477	414	389
gene:Zm00001d003835	0	0	0	0	0	0	0	0	0	0	0	0	0	0	0	0	0	0	0	0	0	0	0	0	0	0	0	0	0	0	0	0	0	0	0	0
gene:Zm00001d003836	155	154	155	118	259	223	125	193	115	174	174	182	182	208	209	217	203	191	170	191	179	284	282	301	333	85	430	216	249	239	295	276	287	267	246	274
[truncated: 37,325 more rows]
